# Supplementary material for: tRNA as an assembly chaperone for a macromolecular transcription-processing complex
Source: Springer Nature journal article supplement (doi:10.1038/s41594-025-01653-y), 2025-09-04
Supplement: MOESM1 [file 41594_2025_1653_MOESM1_ESM.pdf › 41594_2025_1653_MOESM1_ESM.pdf]

# **tRNA as an assembly chaperone for a macromolecular transcription-processing complex**

---

In the format provided by the  
authors and unedited

| Anticodon   | XXX                                                           |
|-------------|---------------------------------------------------------------|
| Gln-TTG-1-1 | GGUCCCAUGGUGUAAUGGUUAGCACUCUGGACUUUGAAUCCAGCGA-UCCGAGUUCAAAU  |
| Gln-CTG-6-1 | GGCCCCAUGGUGUAAUGGUUAGCACUCUGGACUCUGAAUCCAGCGA-UCCGAGUUCAAAU  |
| Gln-TTG-3-1 | GGCCCCAUGGUGUAAUGGUUAGCACUCUGGACUUUGAAUCCAGCGA-UCCGAGUUCAAAU  |
| Gln-TTG-3-2 | GGCCCCAUGGUGUAAUGGUUAGCACUCUGGACUUUGAAUCCAGCGA-UCCGAGUUCAAAU  |
| Gln-TTG-3-3 | GGCCCCAUGGUGUAAUGGUUAGCACUCUGGACUUUGAAUCCAGCGA-UCCGAGUUCAAAU  |
| Gln-TTG-4-1 | GGUCCCAUGGUGUAAUGGUUAGCACUCUGGGCUUUGAAUCCAGCAA-UCCGAGUUCGAAU  |
| Gln-TTG-2-1 | GGUCCCAUGGUGUAAUGGUUAGCACUCUGGACUUUGAAUCCAGCAA-UCCGAGUUCGAAU  |
| Gln-CTG-5-1 | GGUCCCAUGGUGUAAUGGUUAGCACUCUGGACUCUGAAUCCGGUAA-UCCGAGUUCAAAU  |
| Gln-CTG-7-1 | GGUCCCAUGGUGUAAUGGUUAGCACUCUGGACUCUGAAUCCAGCCA-UCUGAGUUCGAGU  |
| Gln-CTG-3-1 | GGUCCCAUGGUGUAAUGGUUAGCACUCUGGACUCUGAAUCCAGCGA-UCCGAGUUCGAGU  |
| Gln-CTG-3-2 | GGUCCCAUGGUGUAAUGGUUAGCACUCUGGACUCUGAAUCCAGCGA-UCCGAGUUCGAGU  |
| Gln-CTG-4-1 | GGUCCCAUGGUGUAAUGGUUAGCACUCUGGACUCUGAAUCCAGCGA-UCCGAGUUCGAGU  |
| Gln-CTG-4-2 | GGUCCCAUGGUGUAAUGGUUAGCACUCUGGACUCUGAAUCCAGCGA-UCCGAGUUCGAGU  |
| Gln-CTG-1-1 | GGUCCCAUGGUGUAAUGGUUAGCACUCUGGACUCUGAAUCCAGCGA-UCCGAGUUCAAAU  |
| Gln-CTG-1-2 | GGUCCCAUGGUGUAAUGGUUAGCACUCUGGACUCUGAAUCCAGCGA-UCCGAGUUCAAAU  |
| Gln-CTG-1-3 | GGUCCCAUGGUGUAAUGGUUAGCACUCUGGACUCUGAAUCCAGCGA-UCCGAGUUCAAAU  |
| Gln-CTG-1-4 | GGUCCCAUGGUGUAAUGGUUAGCACUCUGGACUCUGAAUCCAGCGA-UCCGAGUUCAAAU  |
| Gln-CTG-1-5 | GGUCCCAUGGUGUAAUGGUUAGCACUCUGGACUCUGAAUCCAGCGA-UCCGAGUUCAAAU  |
| Gln-CTG-2-1 | GGUCCCAUGGUGUAAUGGUUAGCACUCUGGACUCUGAAUCCAGCGA-UCCGAGUUCGAGU  |
| Arg-CCG-2-1 | GACCCAGUGGCCUAAUGGAUAAGGCAUACGCCUCCGGAGCUGGGGAUUGUGGGUUCGAGU  |
| Arg-ACG-1-1 | GGGCCAGUGGCGCAAUGGAUAACGCGUCUGACUACGGAUCAGAAGAUUCCAGGUUCGACU  |
| Arg-ACG-1-2 | GGGCCAGUGGCGCAAUGGAUAACGCGUCUGACUACGGAUCAGAAGAUUCCAGGUUCGACU  |
| Arg-ACG-1-3 | GGGCCAGUGGCGCAAUGGAUAACGCGUCUGACUACGGAUCAGAAGAUUCCAGGUUCGACU  |
| Arg-ACG-2-1 | GGGCCAGUGGCGCAAUGGAUAACGCGUCUGACUACGGAUCAGAAGAUUCUAGGUUCGACU  |
| Arg-ACG-2-2 | GGGCCAGUGGCGCAAUGGAUAACGCGUCUGACUACGGAUCAGAAGAUUCUAGGUUCGACU  |
| Arg-ACG-2-3 | GGGCCAGUGGCGCAAUGGAUAACGCGUCUGACUACGGAUCAGAAGAUUCUAGGUUCGACU  |
| Arg-ACG-2-4 | GGGCCAGUGGCGCAAUGGAUAACGCGUCUGACUACGGAUCAGAAGAUUCUAGGUUCGACU  |
| Arg-TCG-5-1 | GACCACGUGGCCUAAUGGAUAAGGCGUCUGACUUCGGAUCAGAAGAUUGAGGGUUCGAAU  |
| Arg-TCG-2-1 | GACCACGUGGCCUAAUGGAUAAGGCGUCUGACUUCGGAUCAGAAGAUUGAGGGUUCGAAU  |
| Arg-TCG-4-1 | GACCACGUGGCCUAAUGGAUAAGGCGUCUGACUUCGGAUCAGAAGAUUGAGGGUUCGAAU  |
| Arg-CCG-1-1 | GGCCGCGUGGCCUAAUGGAUAAGGCGUCUGAUUCCGGAUCAGAAGAUUGAGGGUUCGAGU  |
| Arg-CCG-1-2 | GGCCGCGUGGCCUAAUGGAUAAGGCGUCUGAUUCCGGAUCAGAAGAUUGAGGGUUCGAGU  |
| Arg-CCG-1-3 | GGCCGCGUGGCCUAAUGGAUAAGGCGUCUGAUUCCGGAUCAGAAGAUUGAGGGUUCGAGU  |
| Arg-TCG-3-1 | GACCCGUGUGGCCUAAUGGAUAAGGCGUCUGACUUCGGAUCAGAAGAUUGAGGGUUCGAGU |
| Arg-TCG-6-1 | GGCCGUGUGGCCUAAUGGAUAAGGCGUCUGACUUCGGAUCAAAAGAUUGCAGGUUUGAGU  |
| Arg-TCG-1-1 | GGCCGCGUGGCCUAAUGGAUAAGGCGUCUGACUUCGGAUCAGAAGAUUGCAGGUUUCGAGU |

\*        \*\*\*        \*\*\*\*\*        \*        \*        \*        \*        \*        \*        \*        \*        \*

|             |               |
|-------------|---------------|
| Gln-TTG-1-1 | CUCGGUGGGACCU |
| Gln-TTG-3-1 | CUCGGUGGGACCU |
| Gln-TTG-3-2 | CUCGGUGGGACCU |
| Gln-TTG-3-3 | CUCGGUGGGACCU |
| Gln-TTG-4-1 | CUUGGUGGGACCU |
| Gln-TTG-2-1 | CUCGGUGGGACCU |
| Gln-CTG-5-1 | CUCGGUGGAACCU |
| Gln-CTG-7-1 | CUCUGUGGAACCU |
| Gln-CTG-3-1 | CUCGGUGGAACCU |
| Gln-CTG-3-2 | CUCGGUGGAACCU |
| Gln-CTG-4-1 | CUCGGUGGAACCU |
| Gln-CTG-4-2 | CUCGGUGGAACCU |
| Gln-CTG-1-1 | CUCGGUGGAACCU |
| Gln-CTG-1-2 | CUCGGUGGAACCU |
| Gln-CTG-1-3 | CUCGGUGGAACCU |
| Gln-CTG-1-4 | CUCGGUGGAACCU |
| Gln-CTG-1-5 | CUCGGUGGAACCU |
| Gln-CTG-2-1 | CUCGGUGGAACCU |
| Arg-CCG-2-1 | CCCAUCUGGGUCG |
| Arg-ACG-1-1 | CCUGGCUGGCUCG |
| Arg-ACG-1-2 | CCUGGCUGGCUCG |
| Arg-ACG-1-3 | CCUGGCUGGCUCG |
| Arg-ACG-2-1 | CCUGGCUGGCUCG |
| Arg-ACG-2-2 | CCUGGCUGGCUCG |
| Arg-ACG-2-3 | CCUGGCUGGCUCG |
| Arg-ACG-2-4 | CCUGGCUGGCUCG |
| Arg-TCG-5-1 | CCCUUCGUGGUUG |
| Arg-TCG-2-1 | CCCUCCGUGGUUA |
| Arg-TCG-4-1 | CCCUUCGUGGUUA |
| Arg-CCG-1-1 | CCCUUCGUGGUCG |
| Arg-CCG-1-2 | CCCUUCGUGGUCG |
| Arg-CCG-1-3 | CCCUUCGUGGUCG |
| Arg-TCG-3-1 | CCCUUCGUGGUCG |
| Arg-TCG-6-1 | UCUGCCACGGUCG |
| Arg-TCG-1-1 | CCUGCCGCGGUCG |
