# Supplementary material for: tRNA as an assembly chaperone for a macromolecular transcription-processing complex
Source: Springer Nature journal article supplement (doi:10.1038/s41594-025-01653-y), 2025-09-04

Fig.1B

Core vRNAP with tRNA<sup>Gln/Arg</sup>\_1

10%

30%

1 2 3 4 5 6 7 8 9 10 11 12 13 14 15 16 17 18 19 20 21

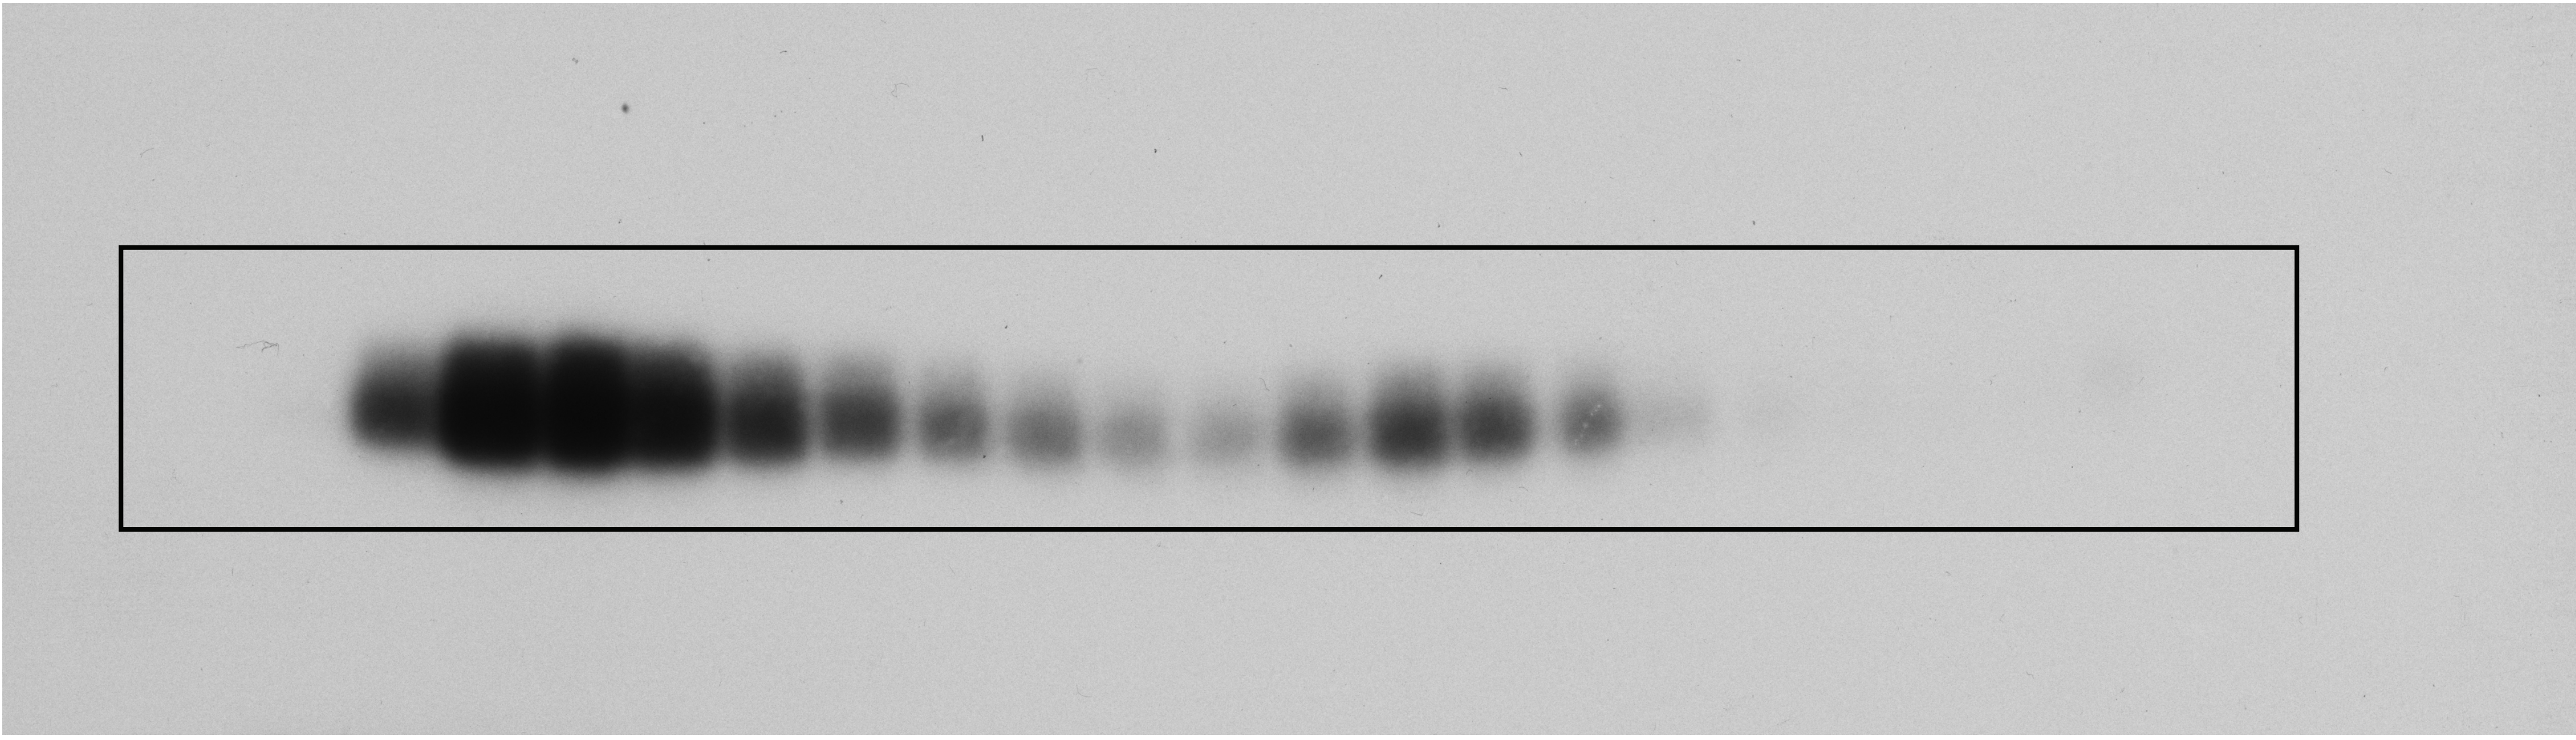

10%

Core vRNAP with tRNA<sup>Gln/Arg</sup>\_2

30%

1 2 3 4 5 6 7 8 9 10 11 12 13 14 15 16 17 18 19 20 21

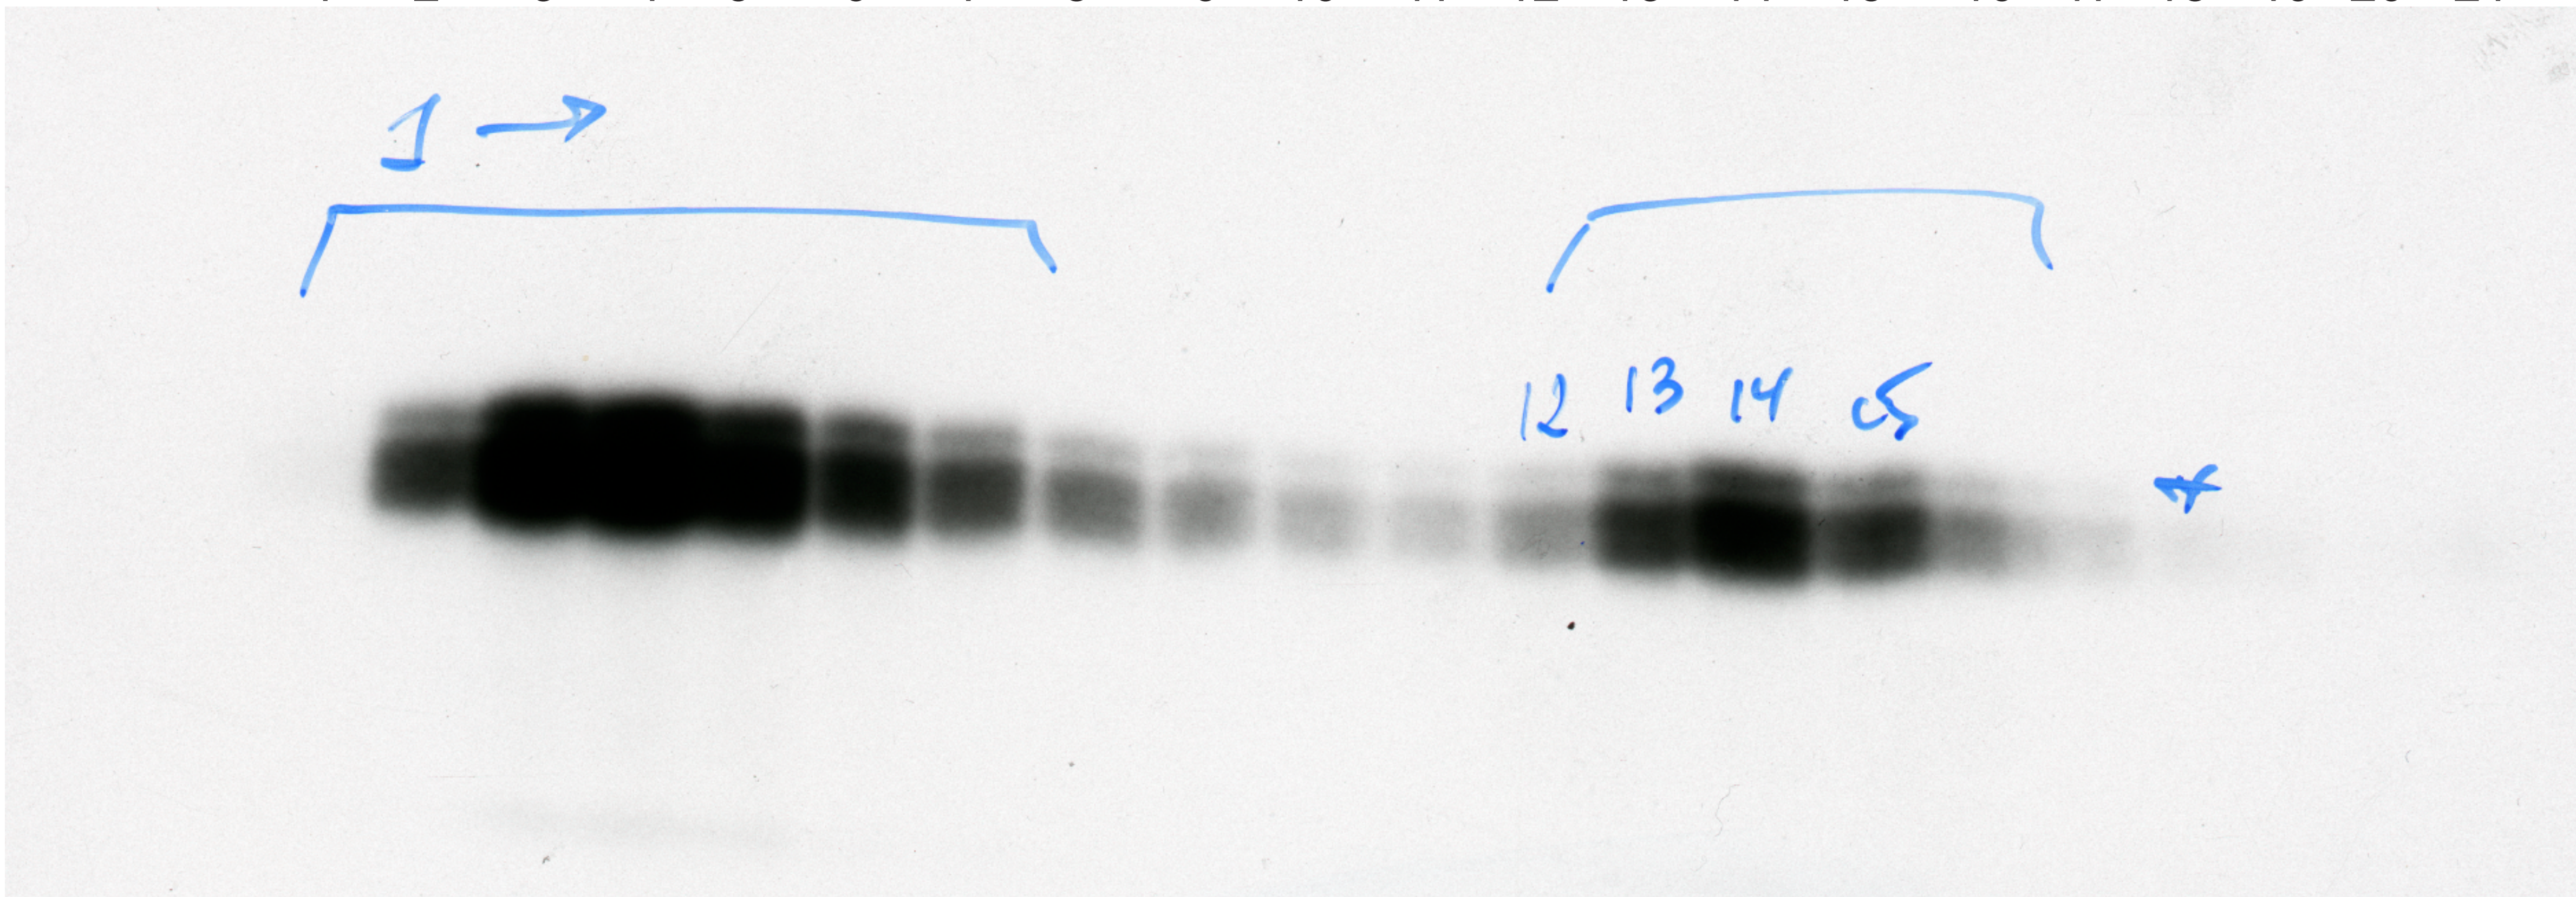

Core vRNAP with tRNA<sup>Gln/Arg</sup>\_3

10%

30%

1 2 3 4 5 6 7 8 9 10 11 12 13 14 15 16 17 18 19 20 21

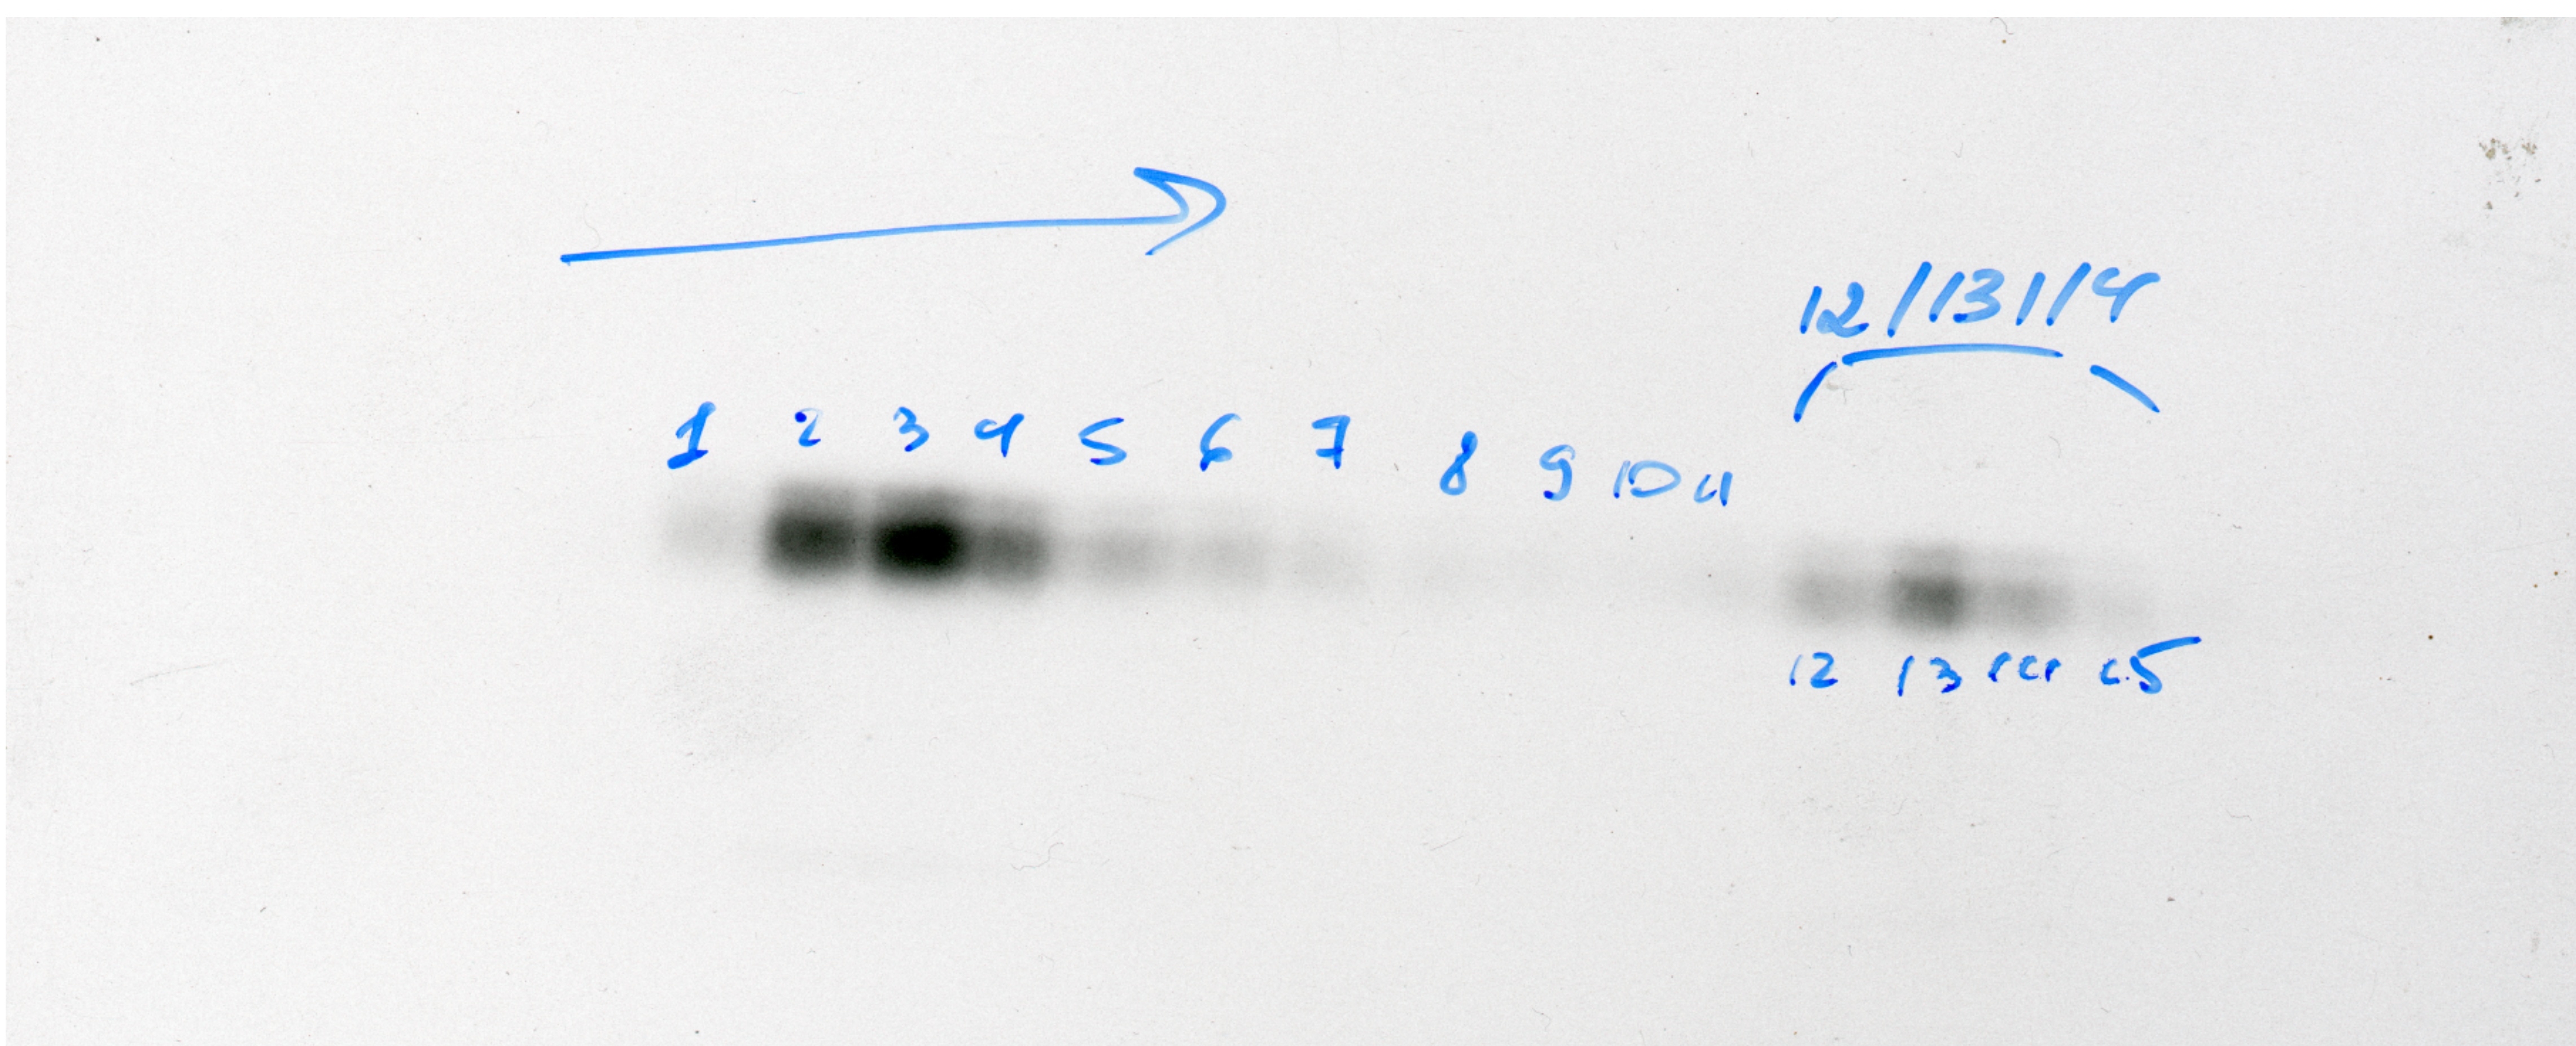



Fig.1B

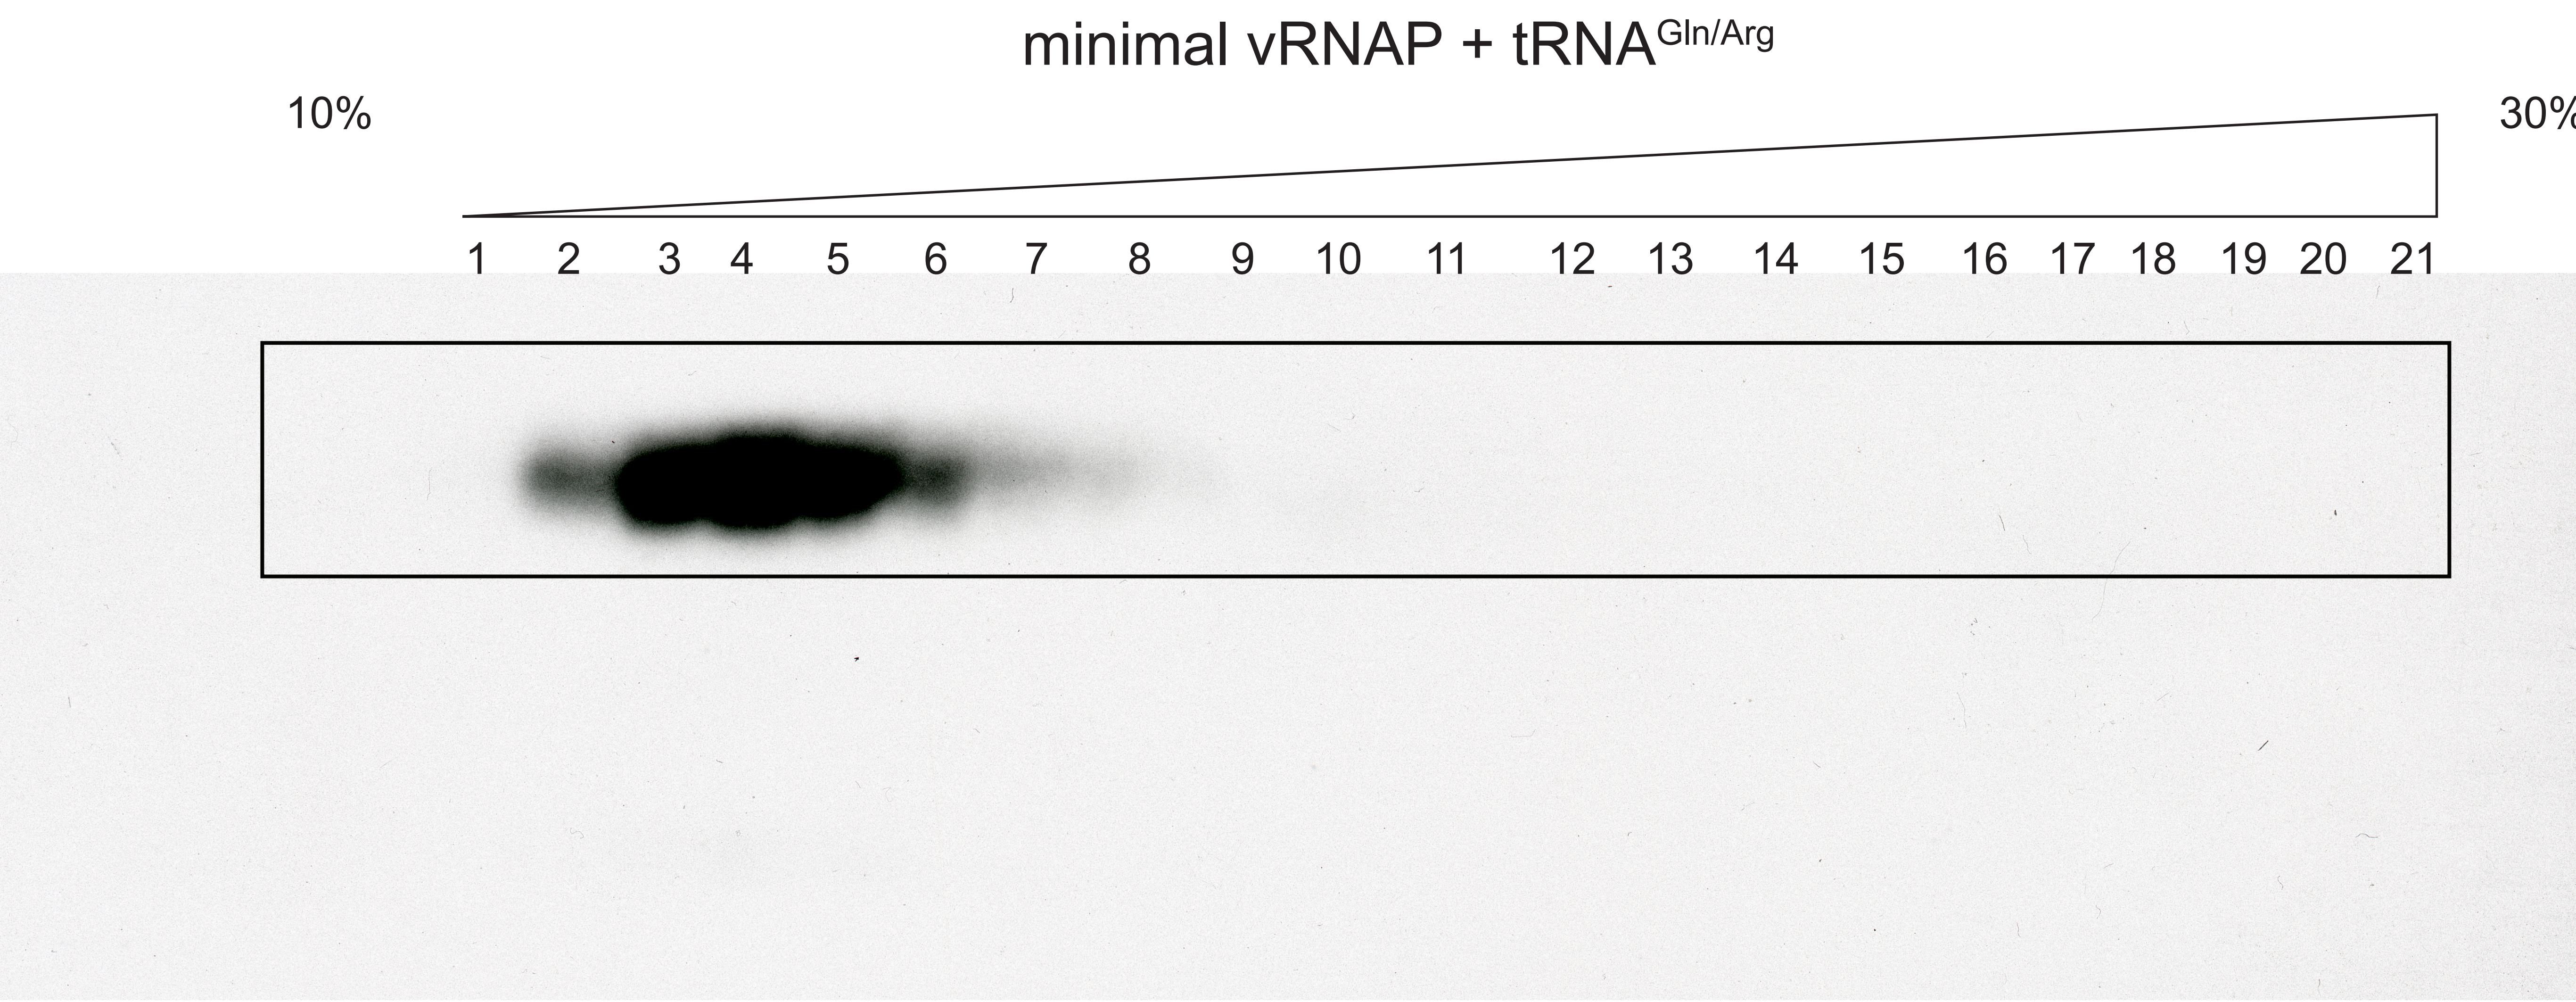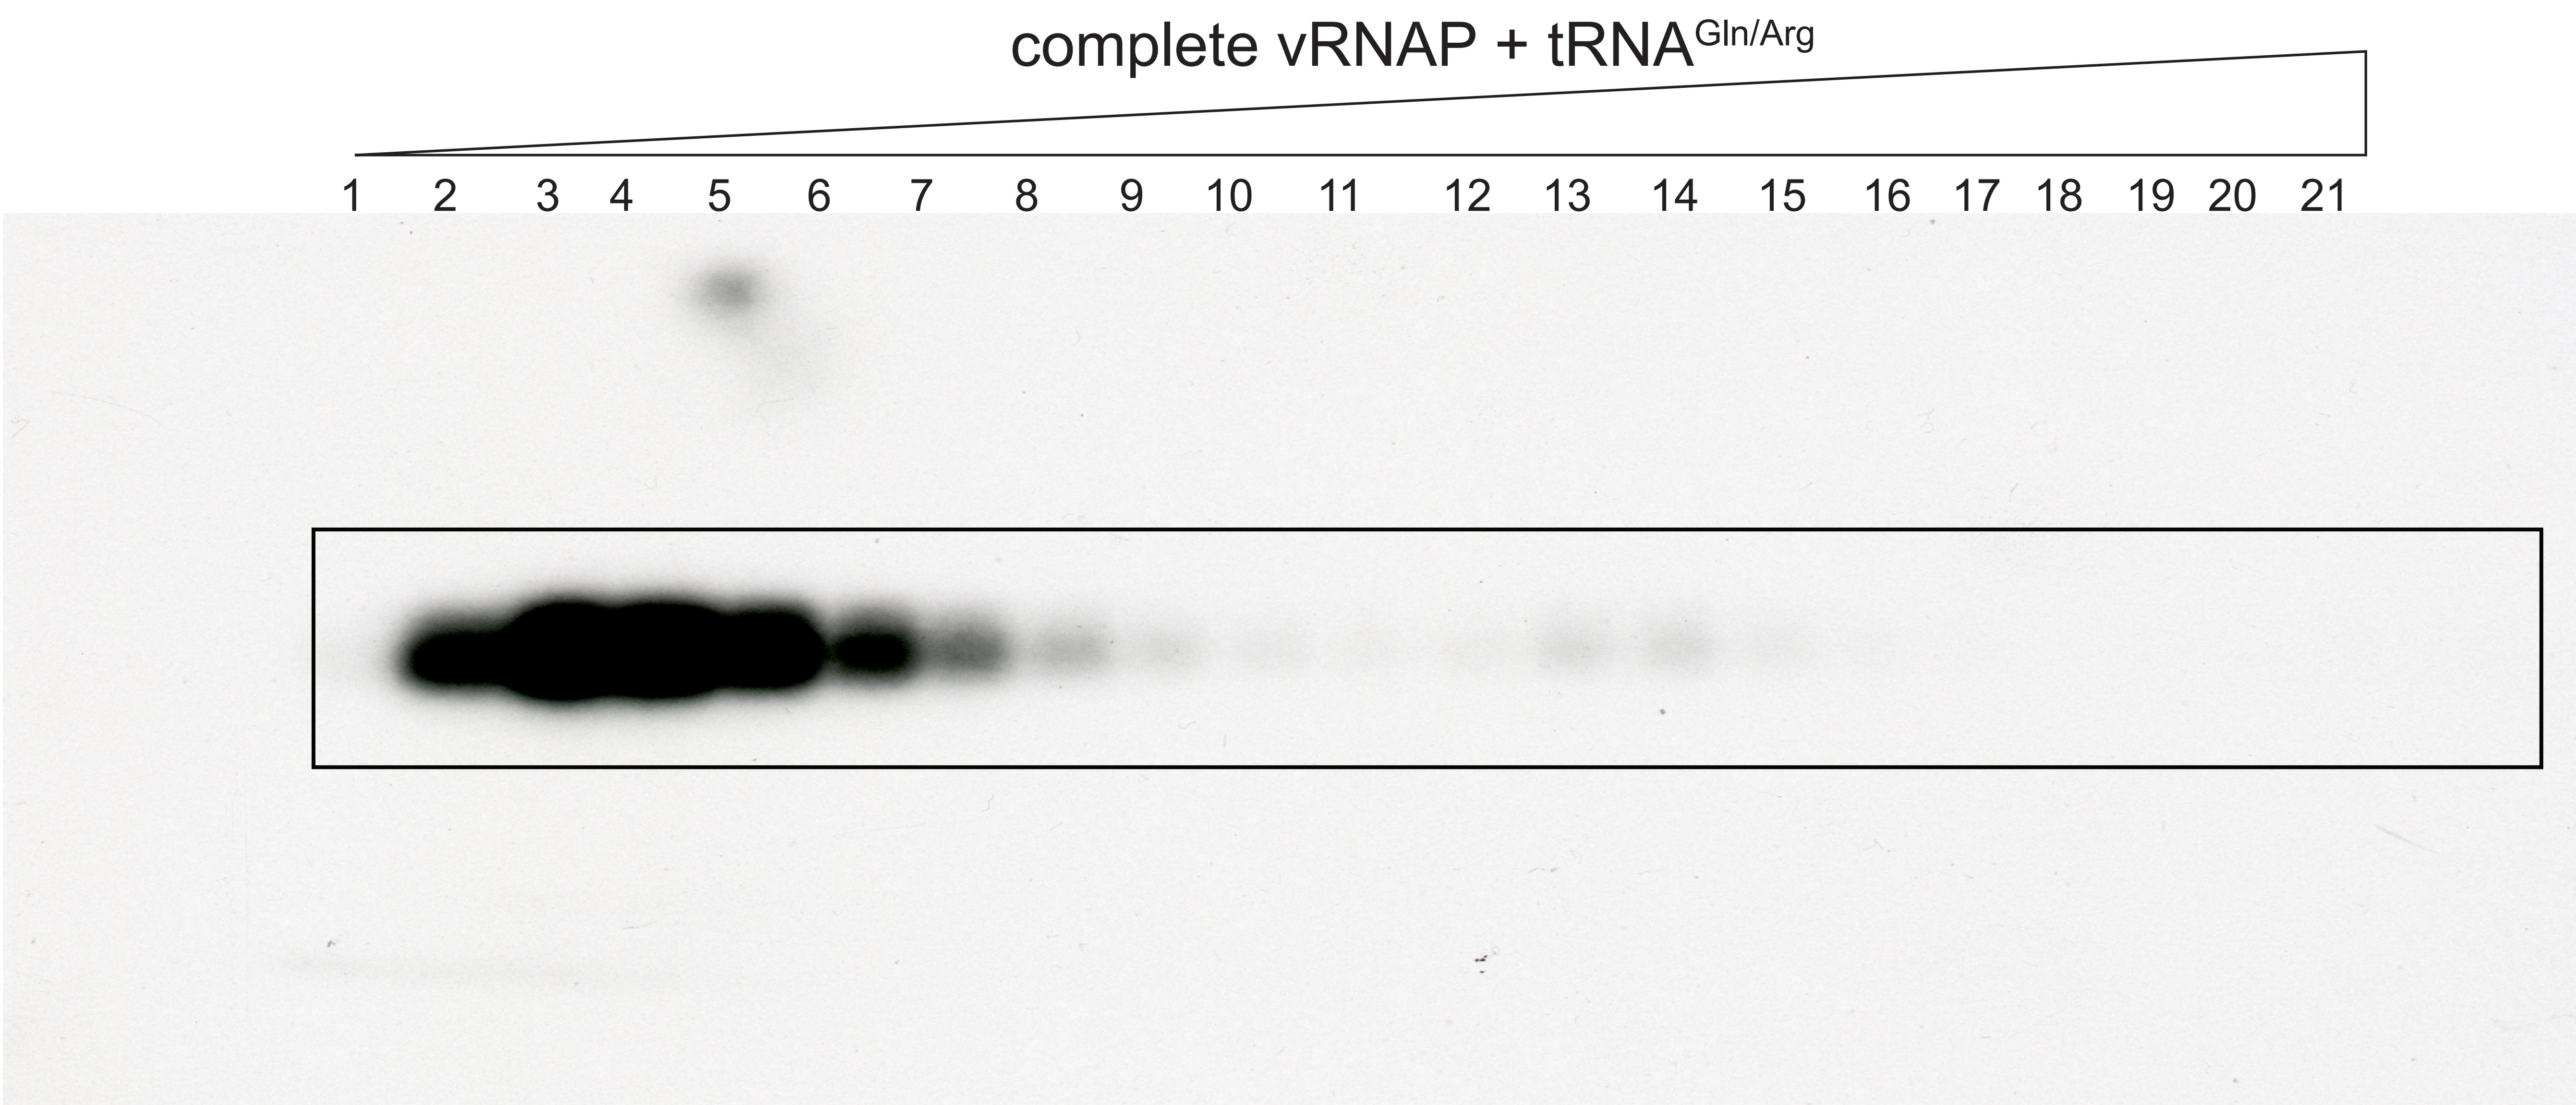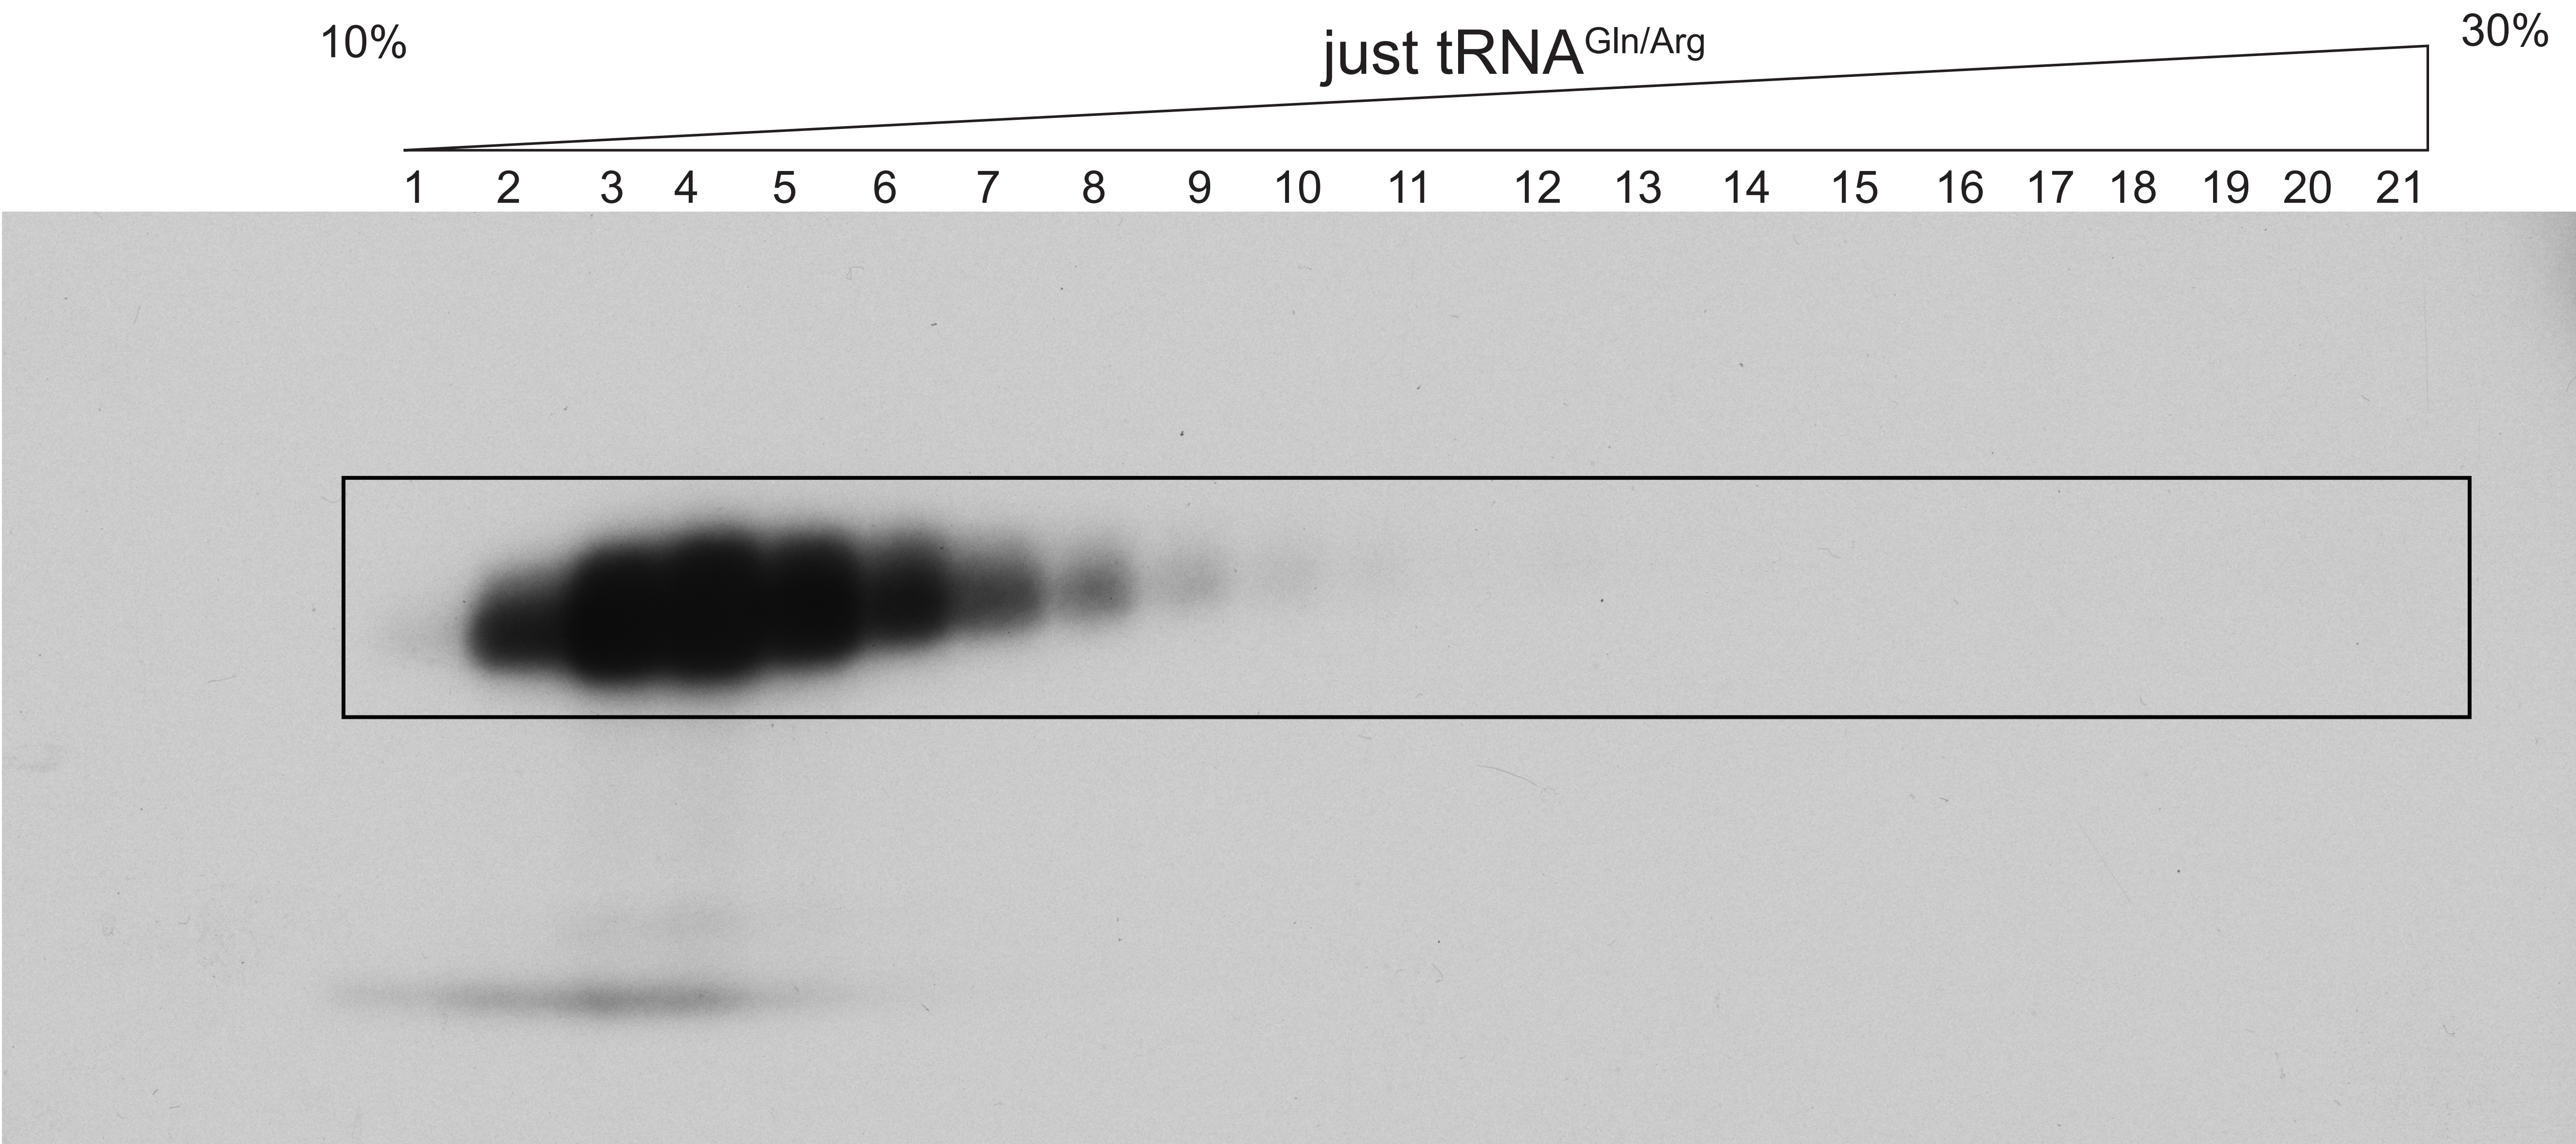



Fig.1C

Shift assay\_Core vRNAP/tRNA<sup>Gln/Arg</sup>/E11/CE/NPH-I

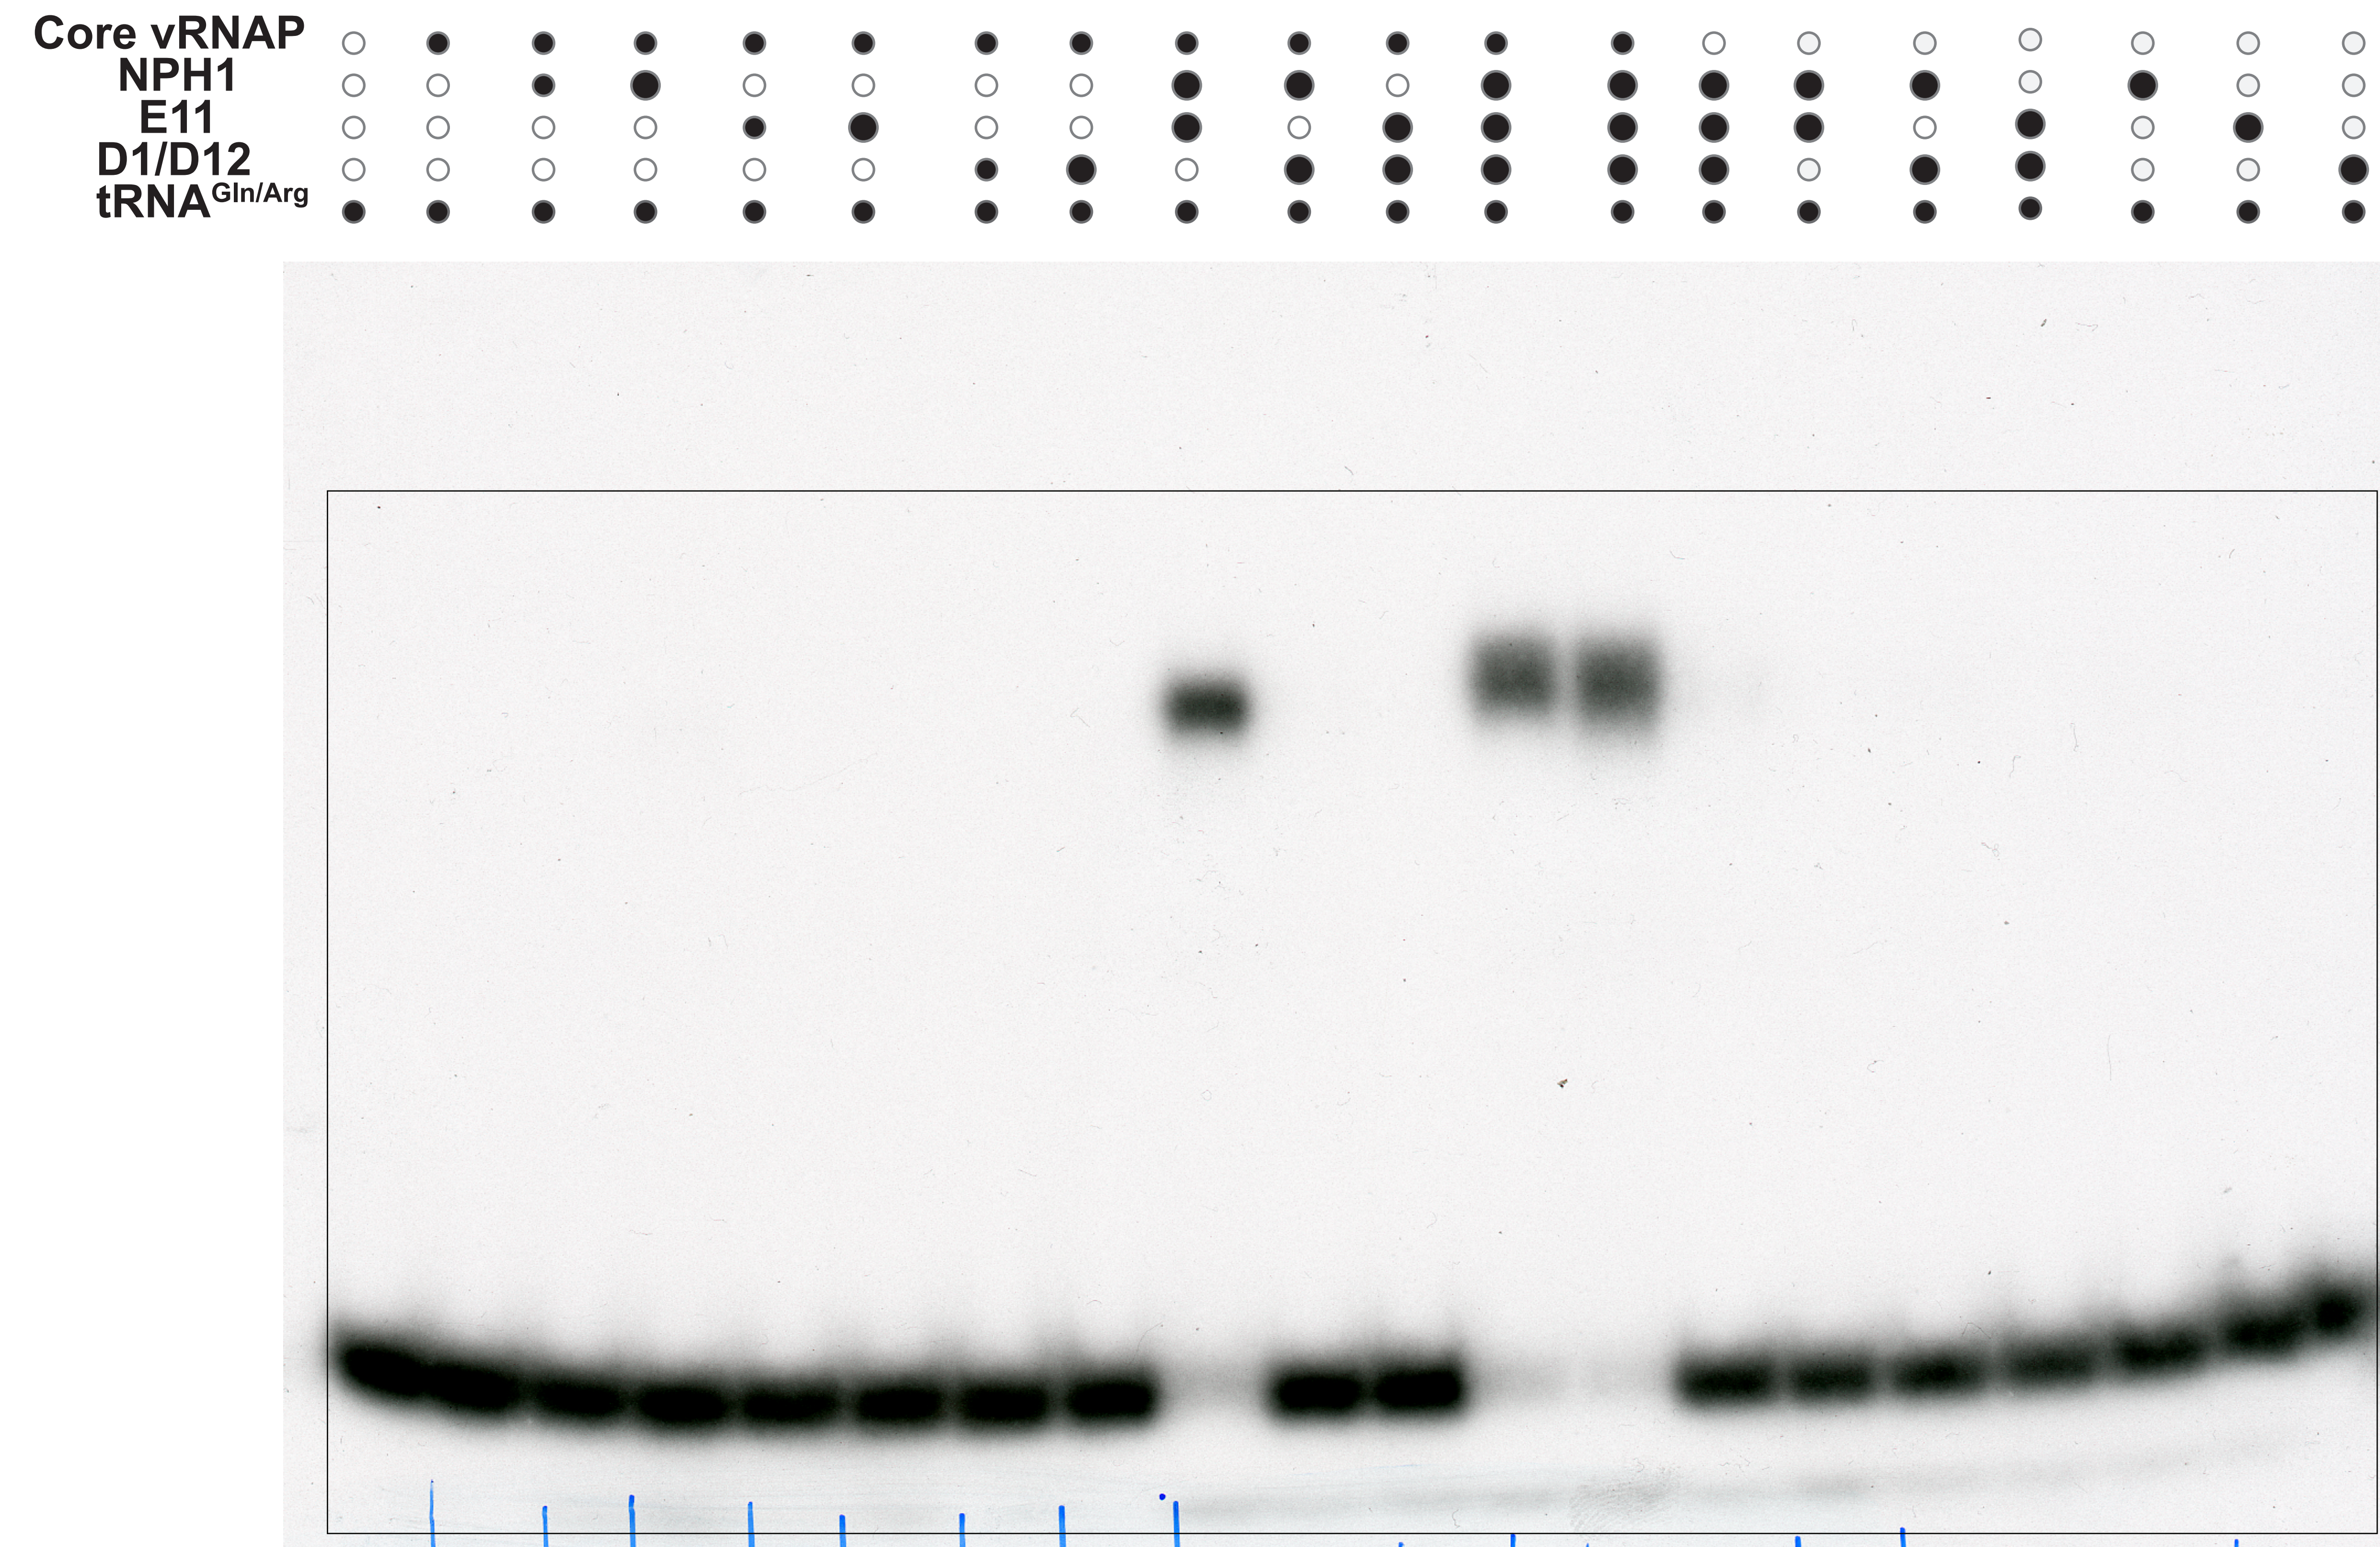

Shift assay\_Core vRNAP/tRNA<sup>Gln/Arg</sup>/E11/CE/NPH-I\_2

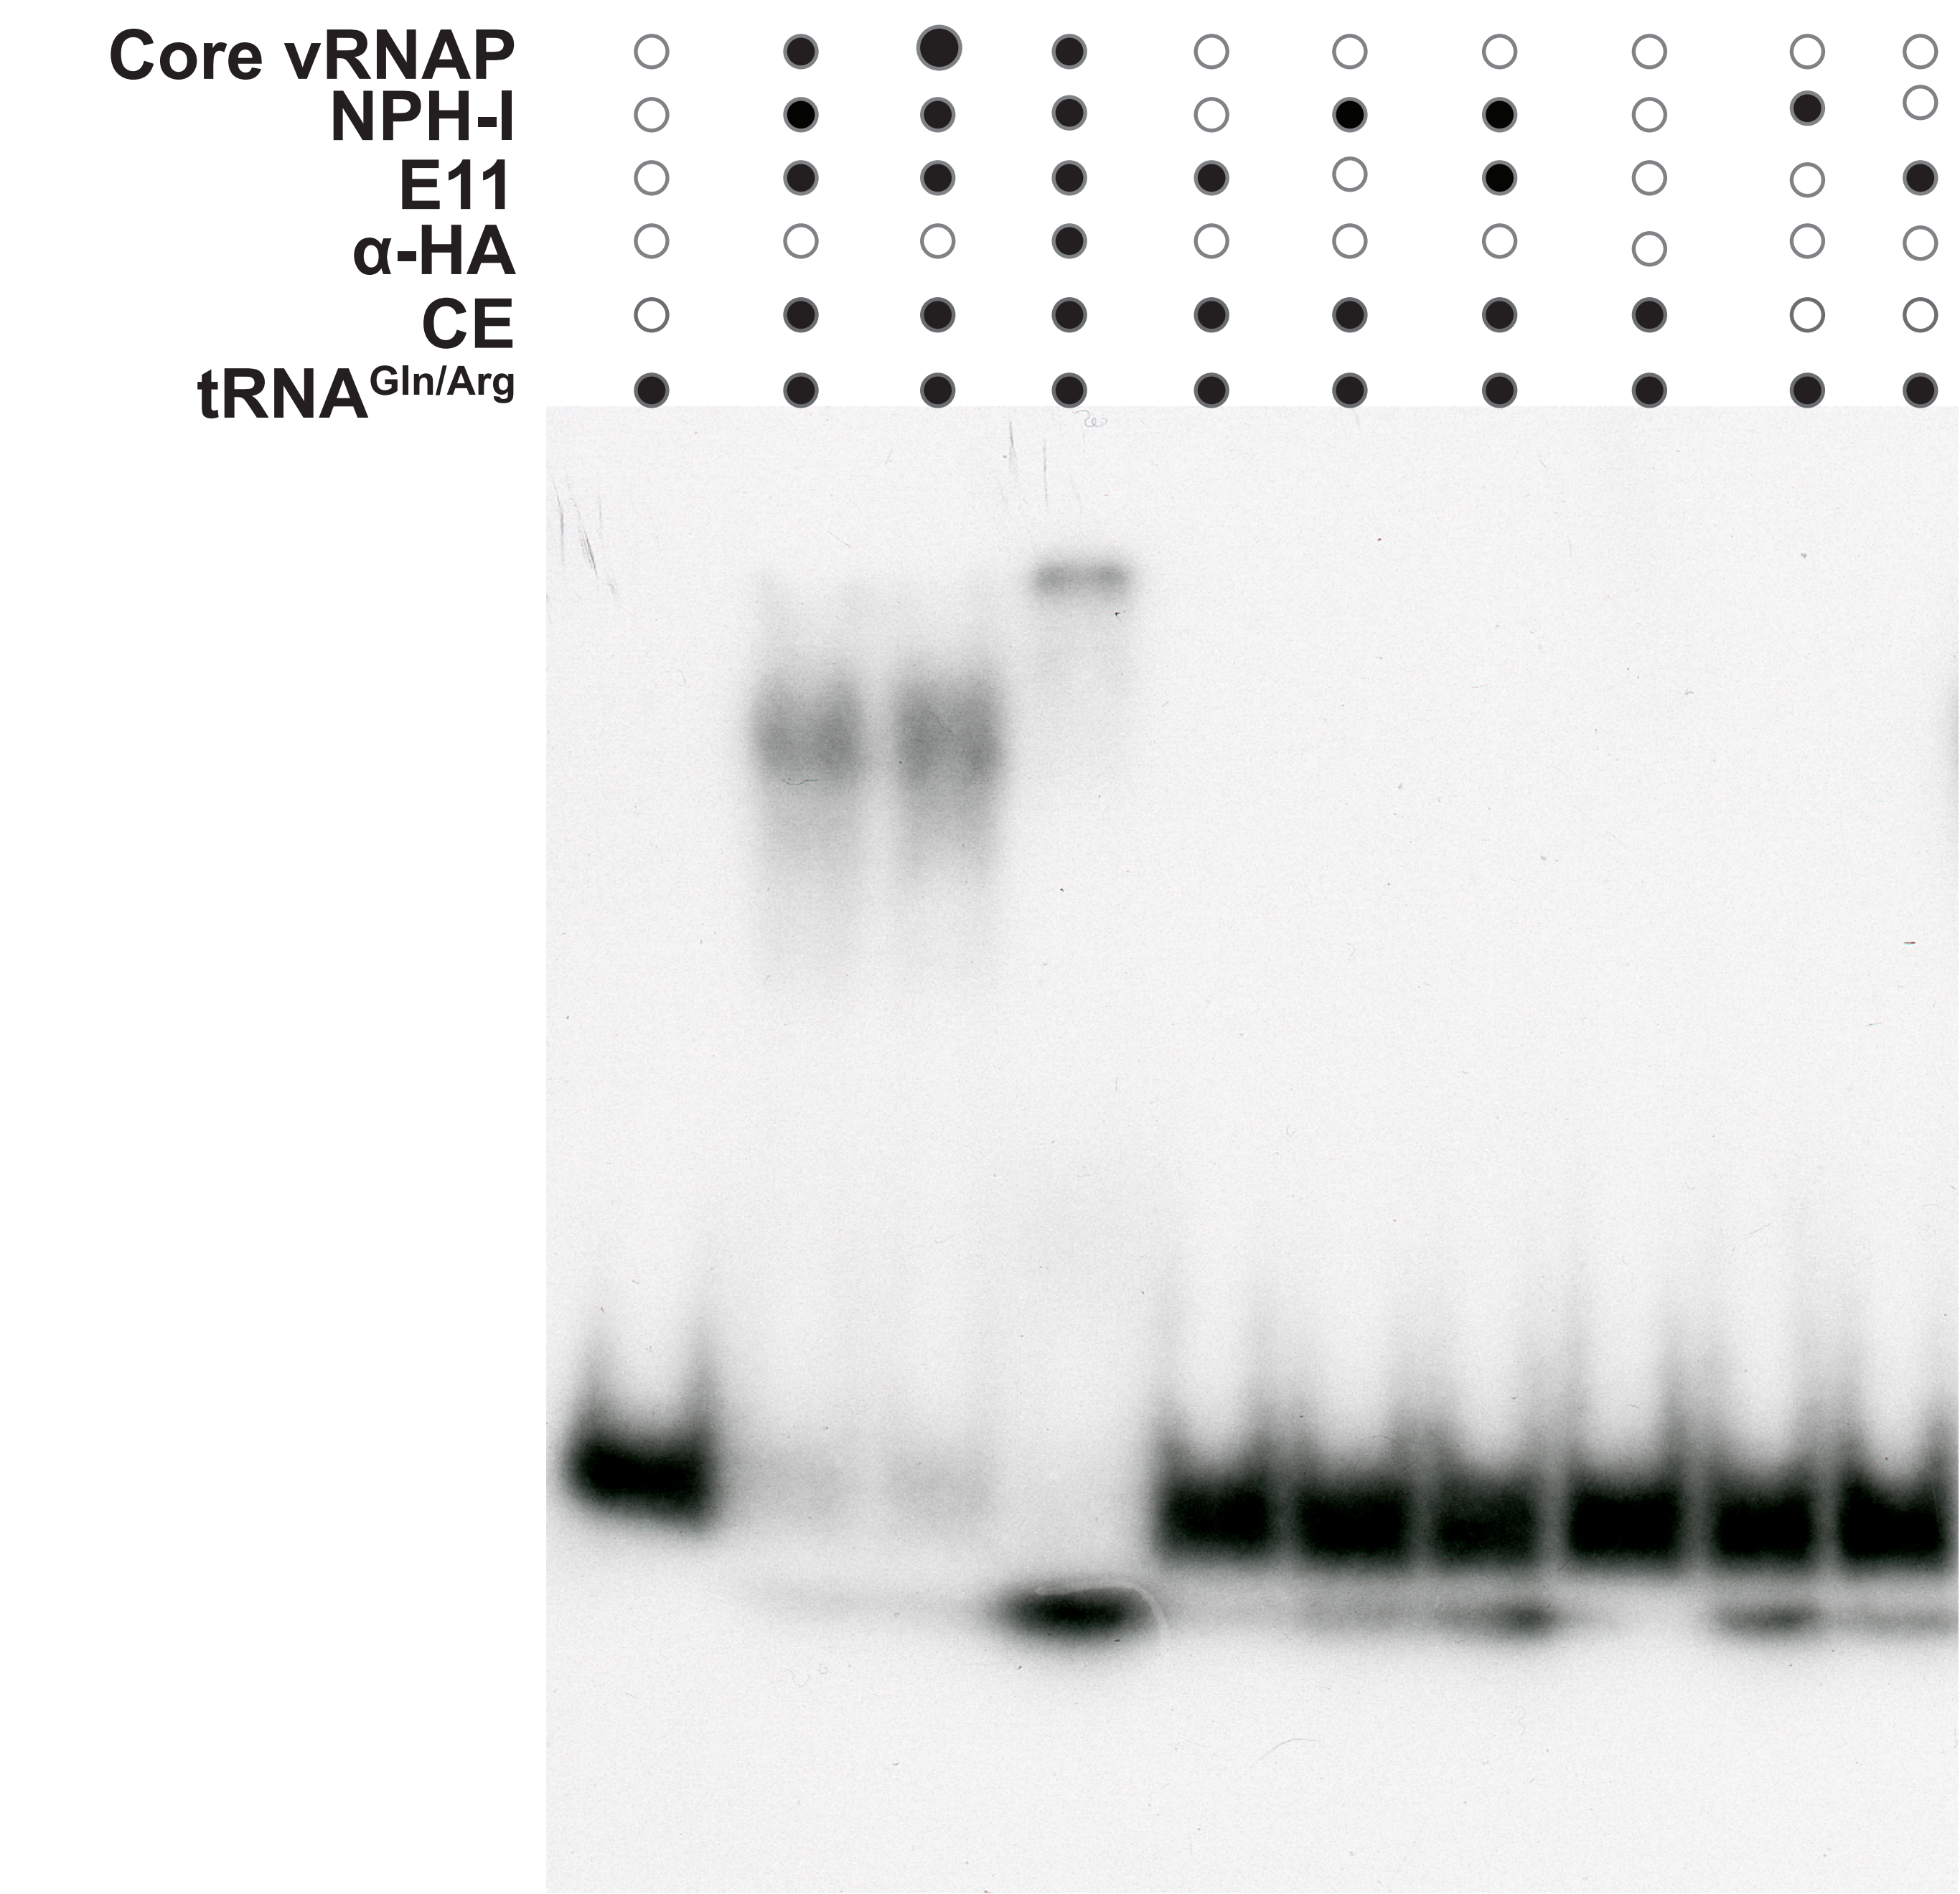

Shift assay\_Core vRNAP/tRNA<sup>Gln/Arg</sup>/E11/CE/NPH-I\_3

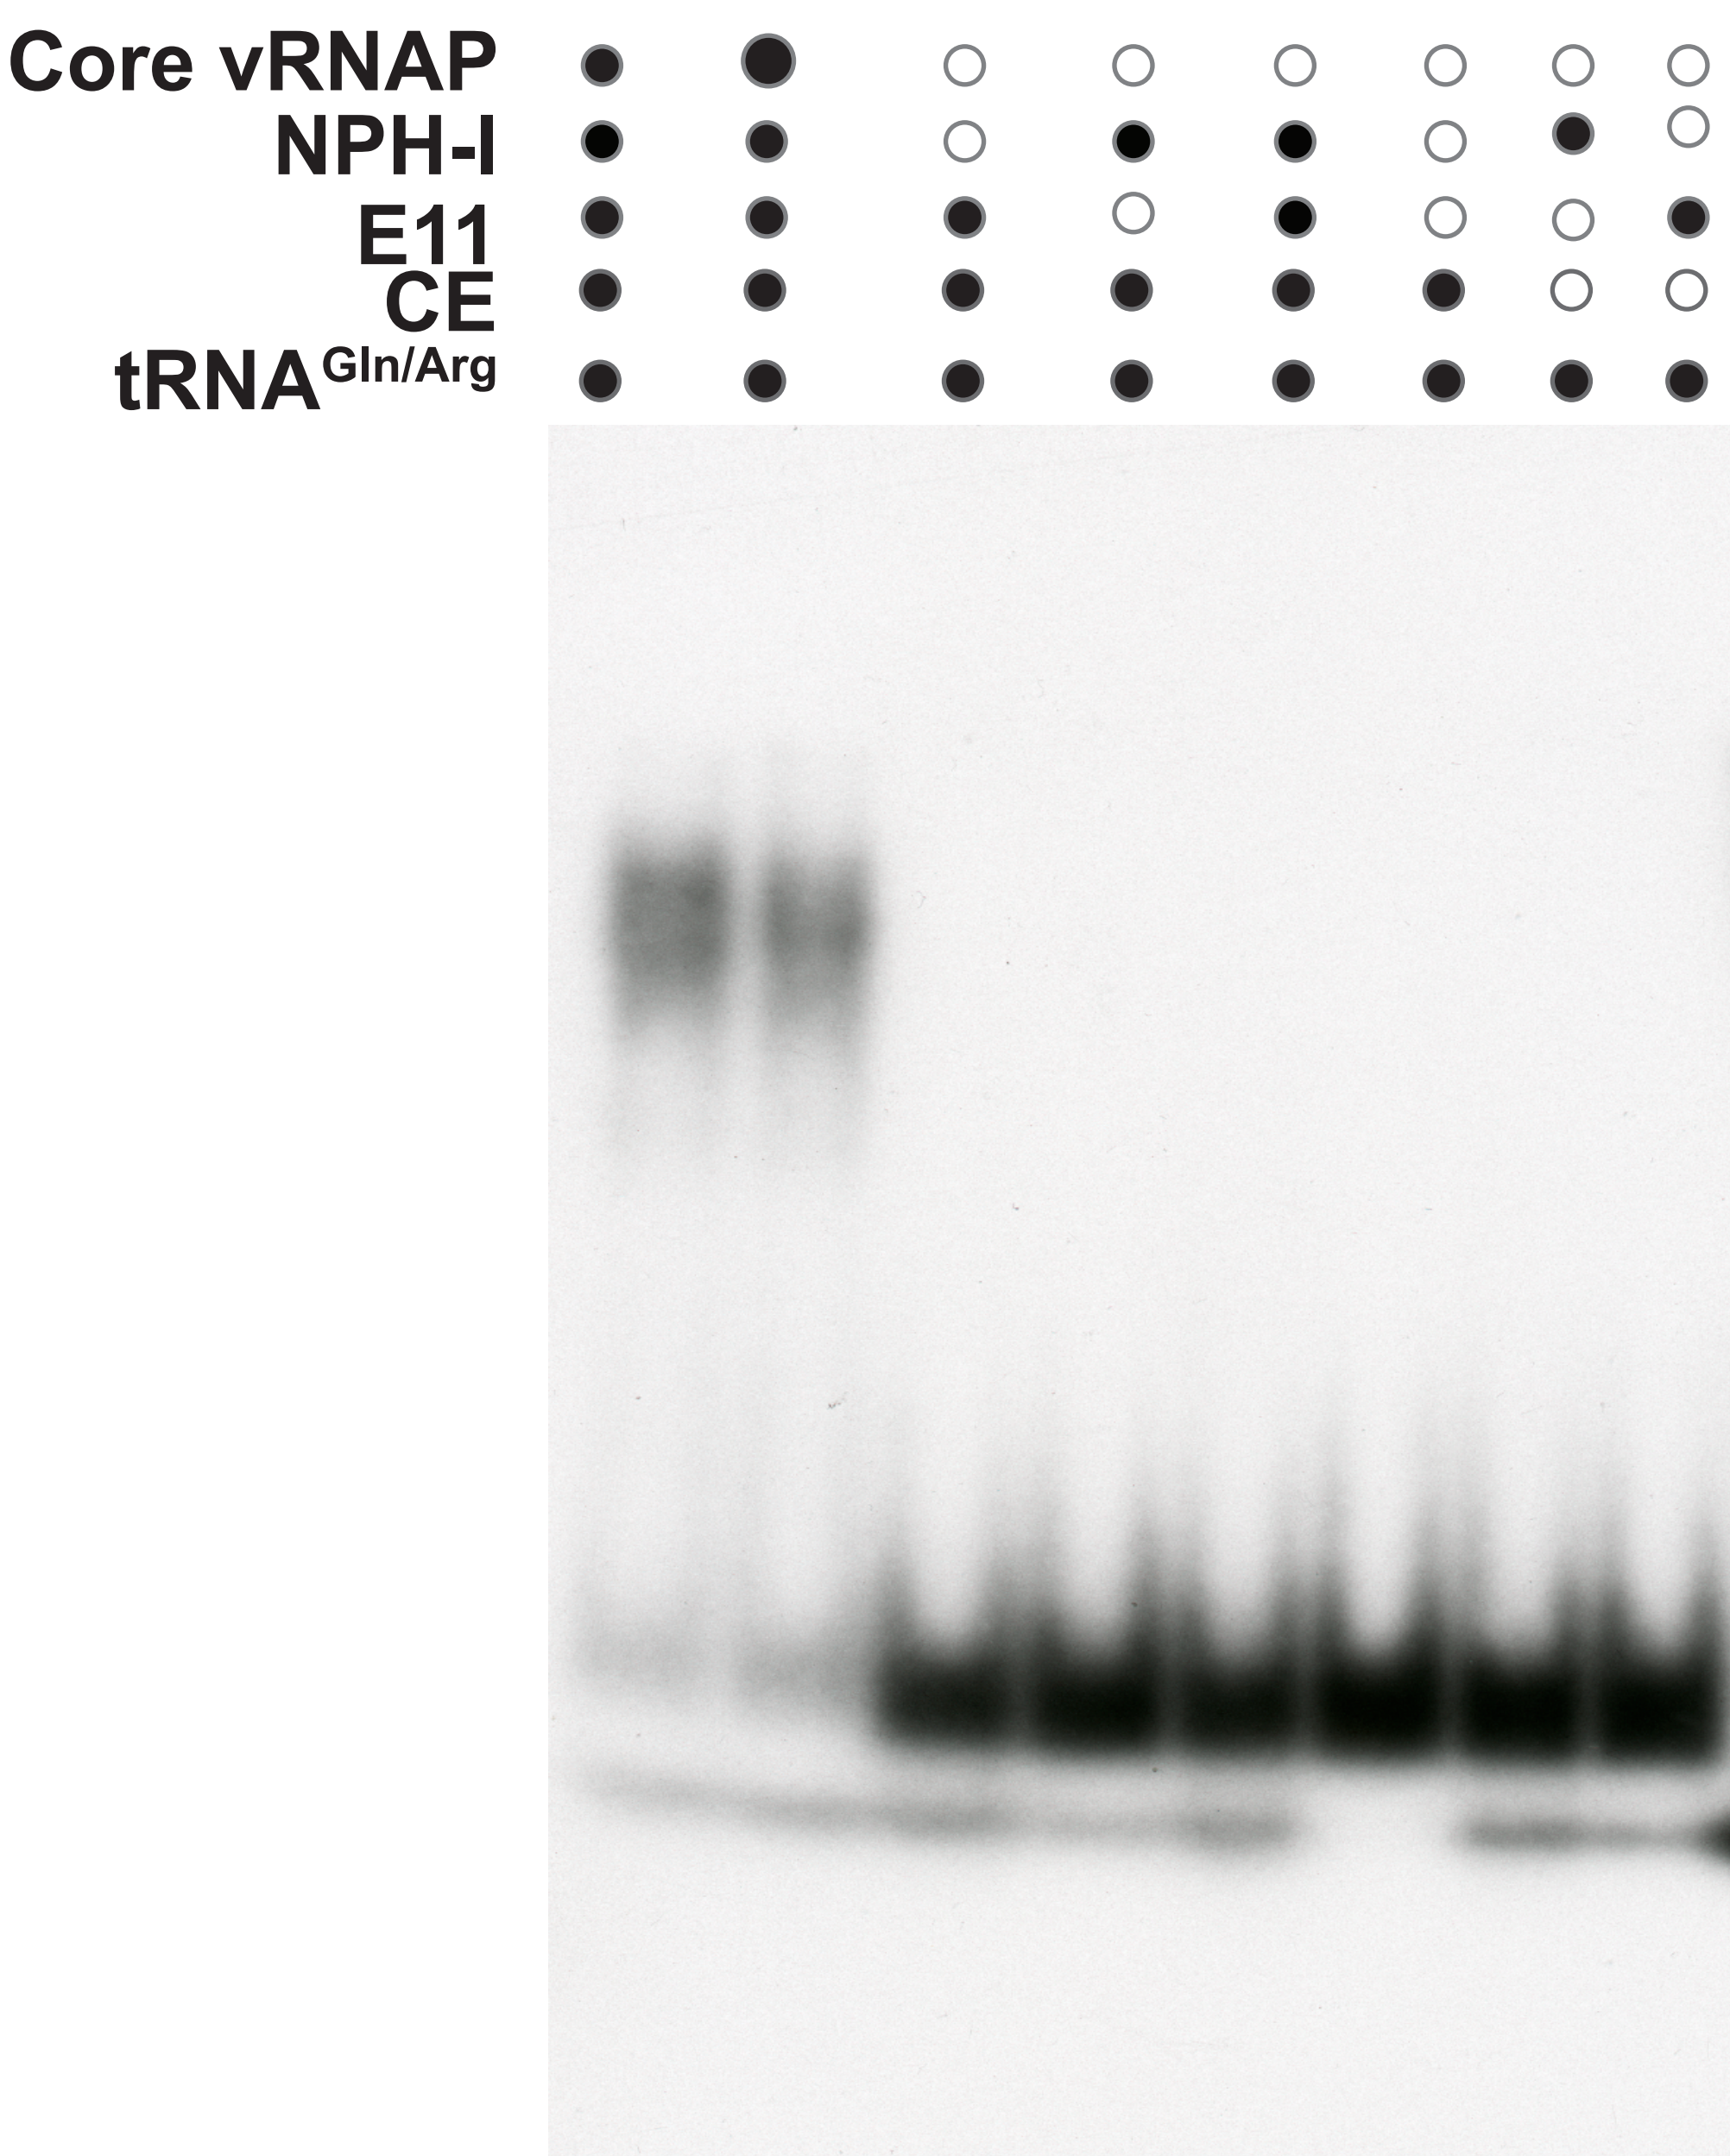

Shift assay\_Core vRNAP/tRNA<sup>Gln/Arg</sup>/E11/CE/NPH-I\_4

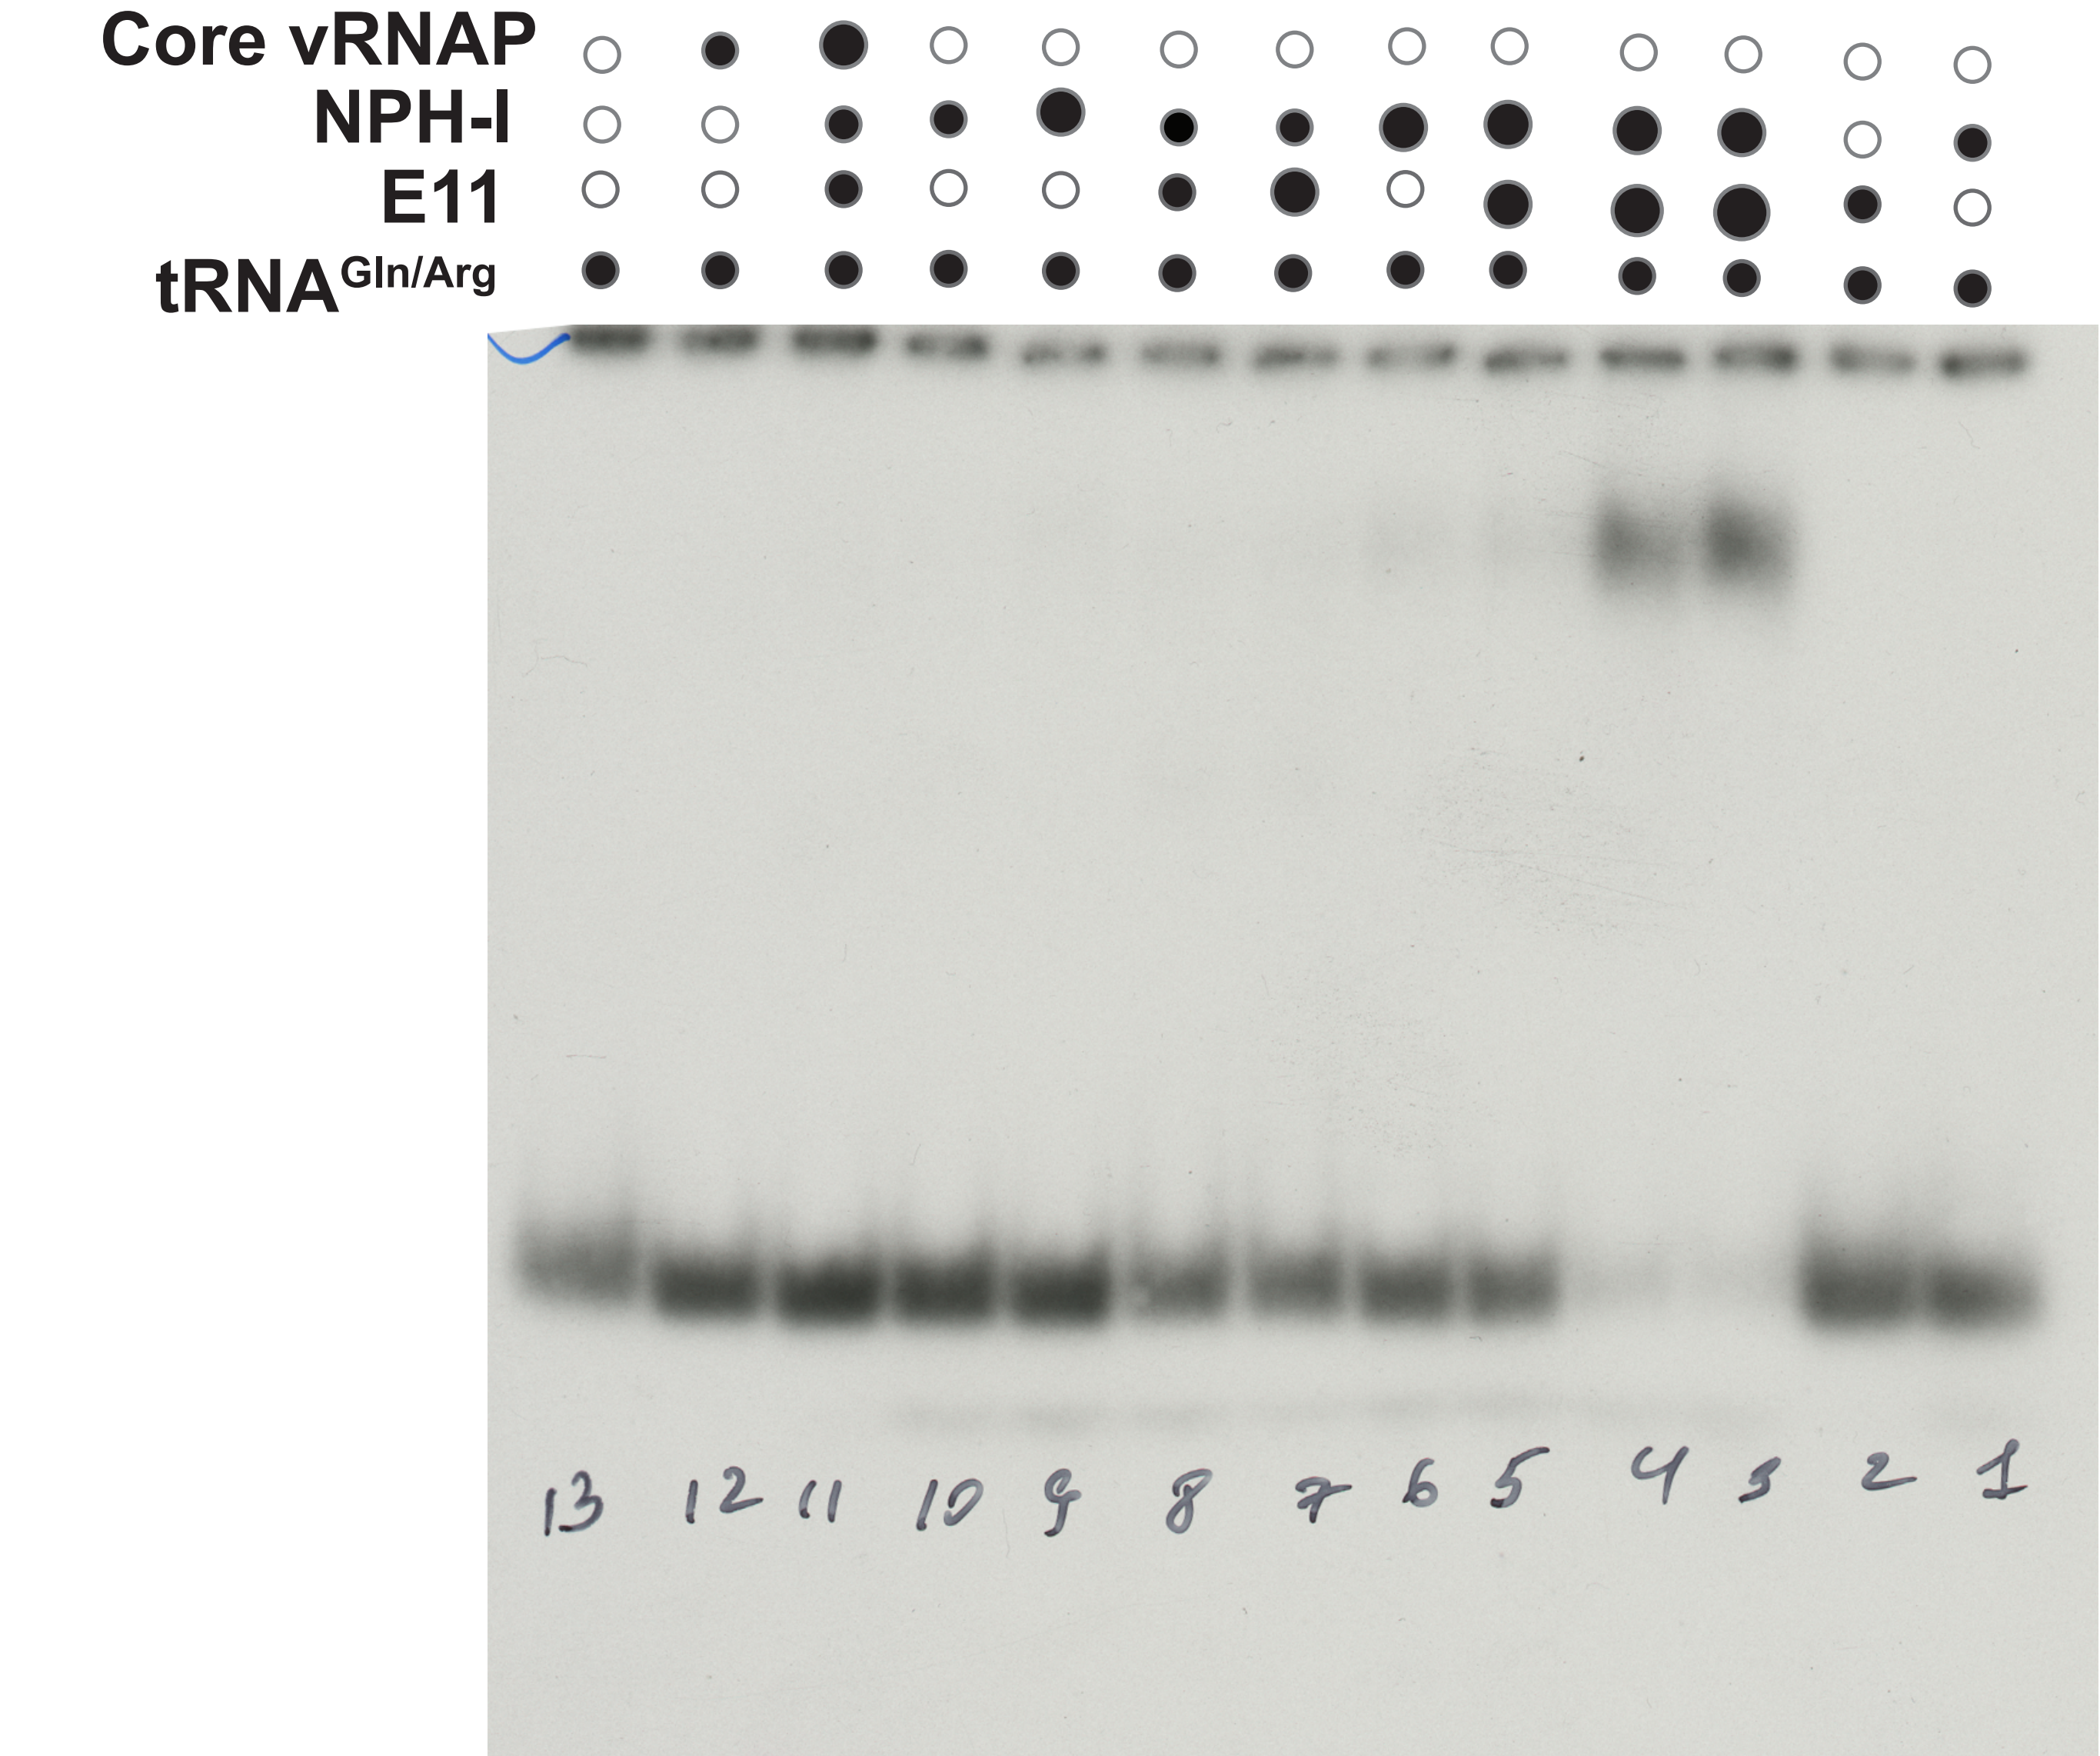

Supplement: MOESM8 [file 41594_2025_1653_MOESM8_ESM.pdf › 41594_2025_1653_MOESM8_ESM.pdf]
