# Supplementary material for: tRNA as an assembly chaperone for a macromolecular transcription-processing complex
Source: Springer Nature journal article supplement (doi:10.1038/s41594-025-01653-y), 2025-09-04

Fig. 6A

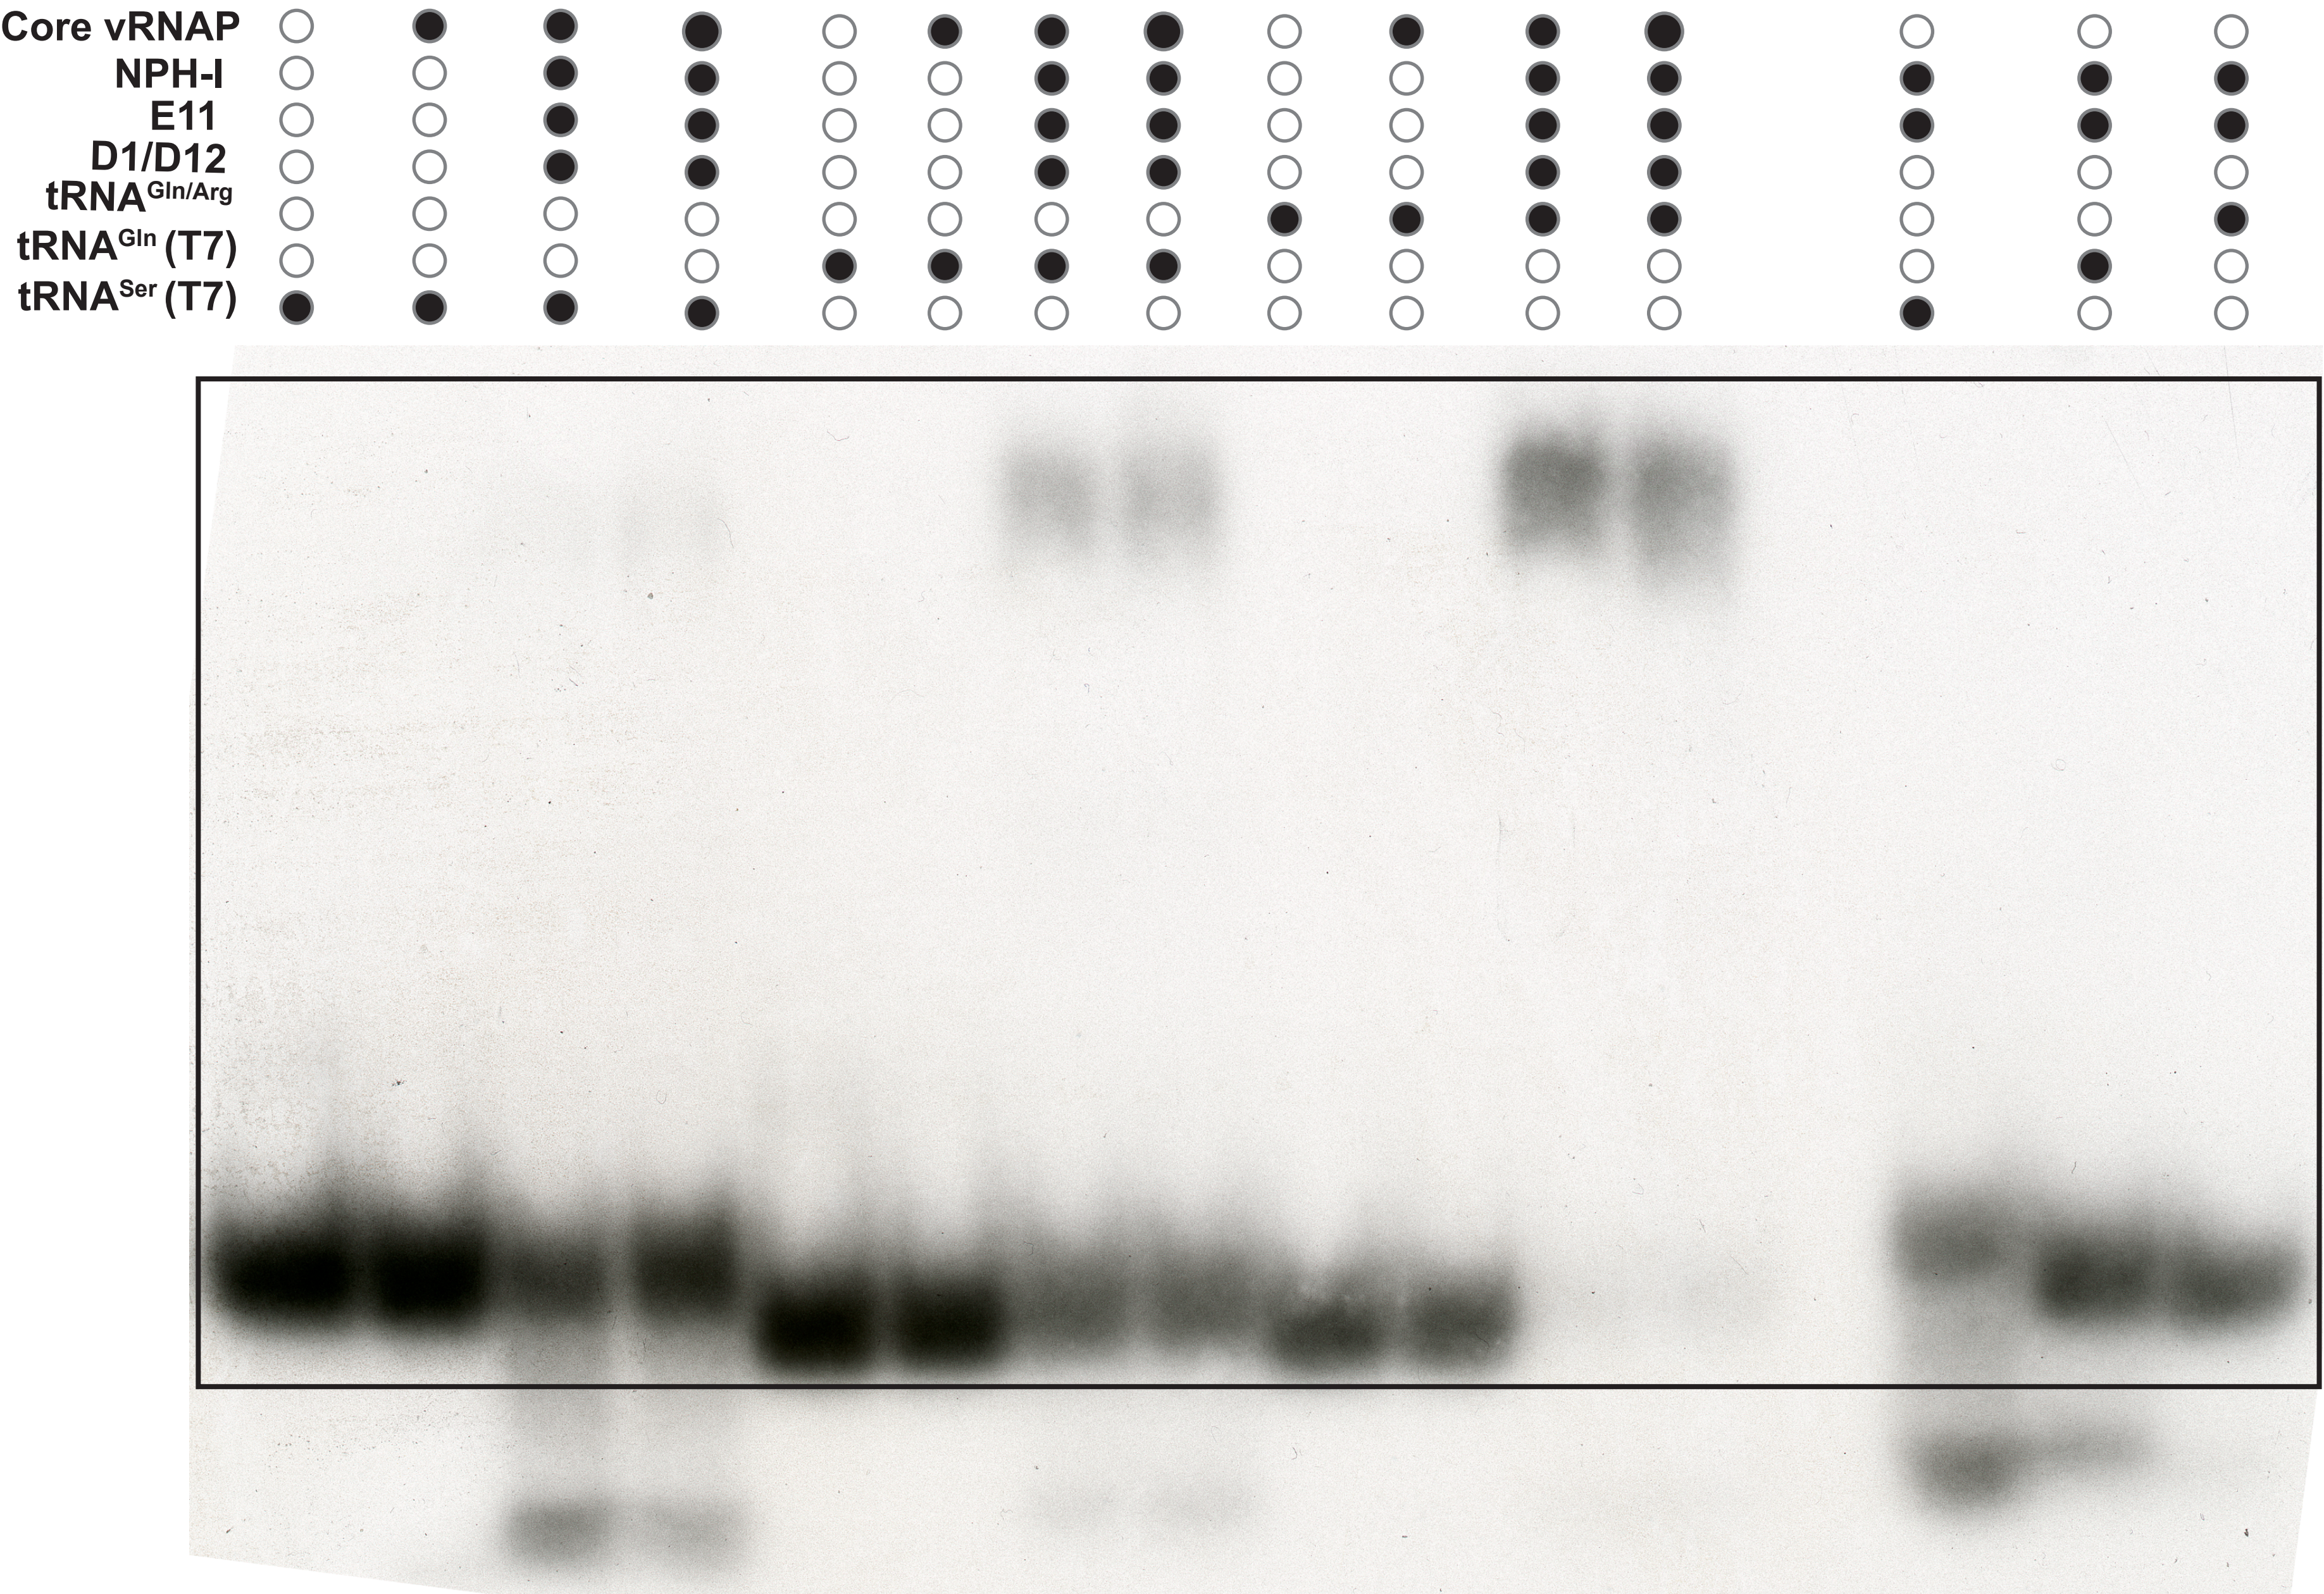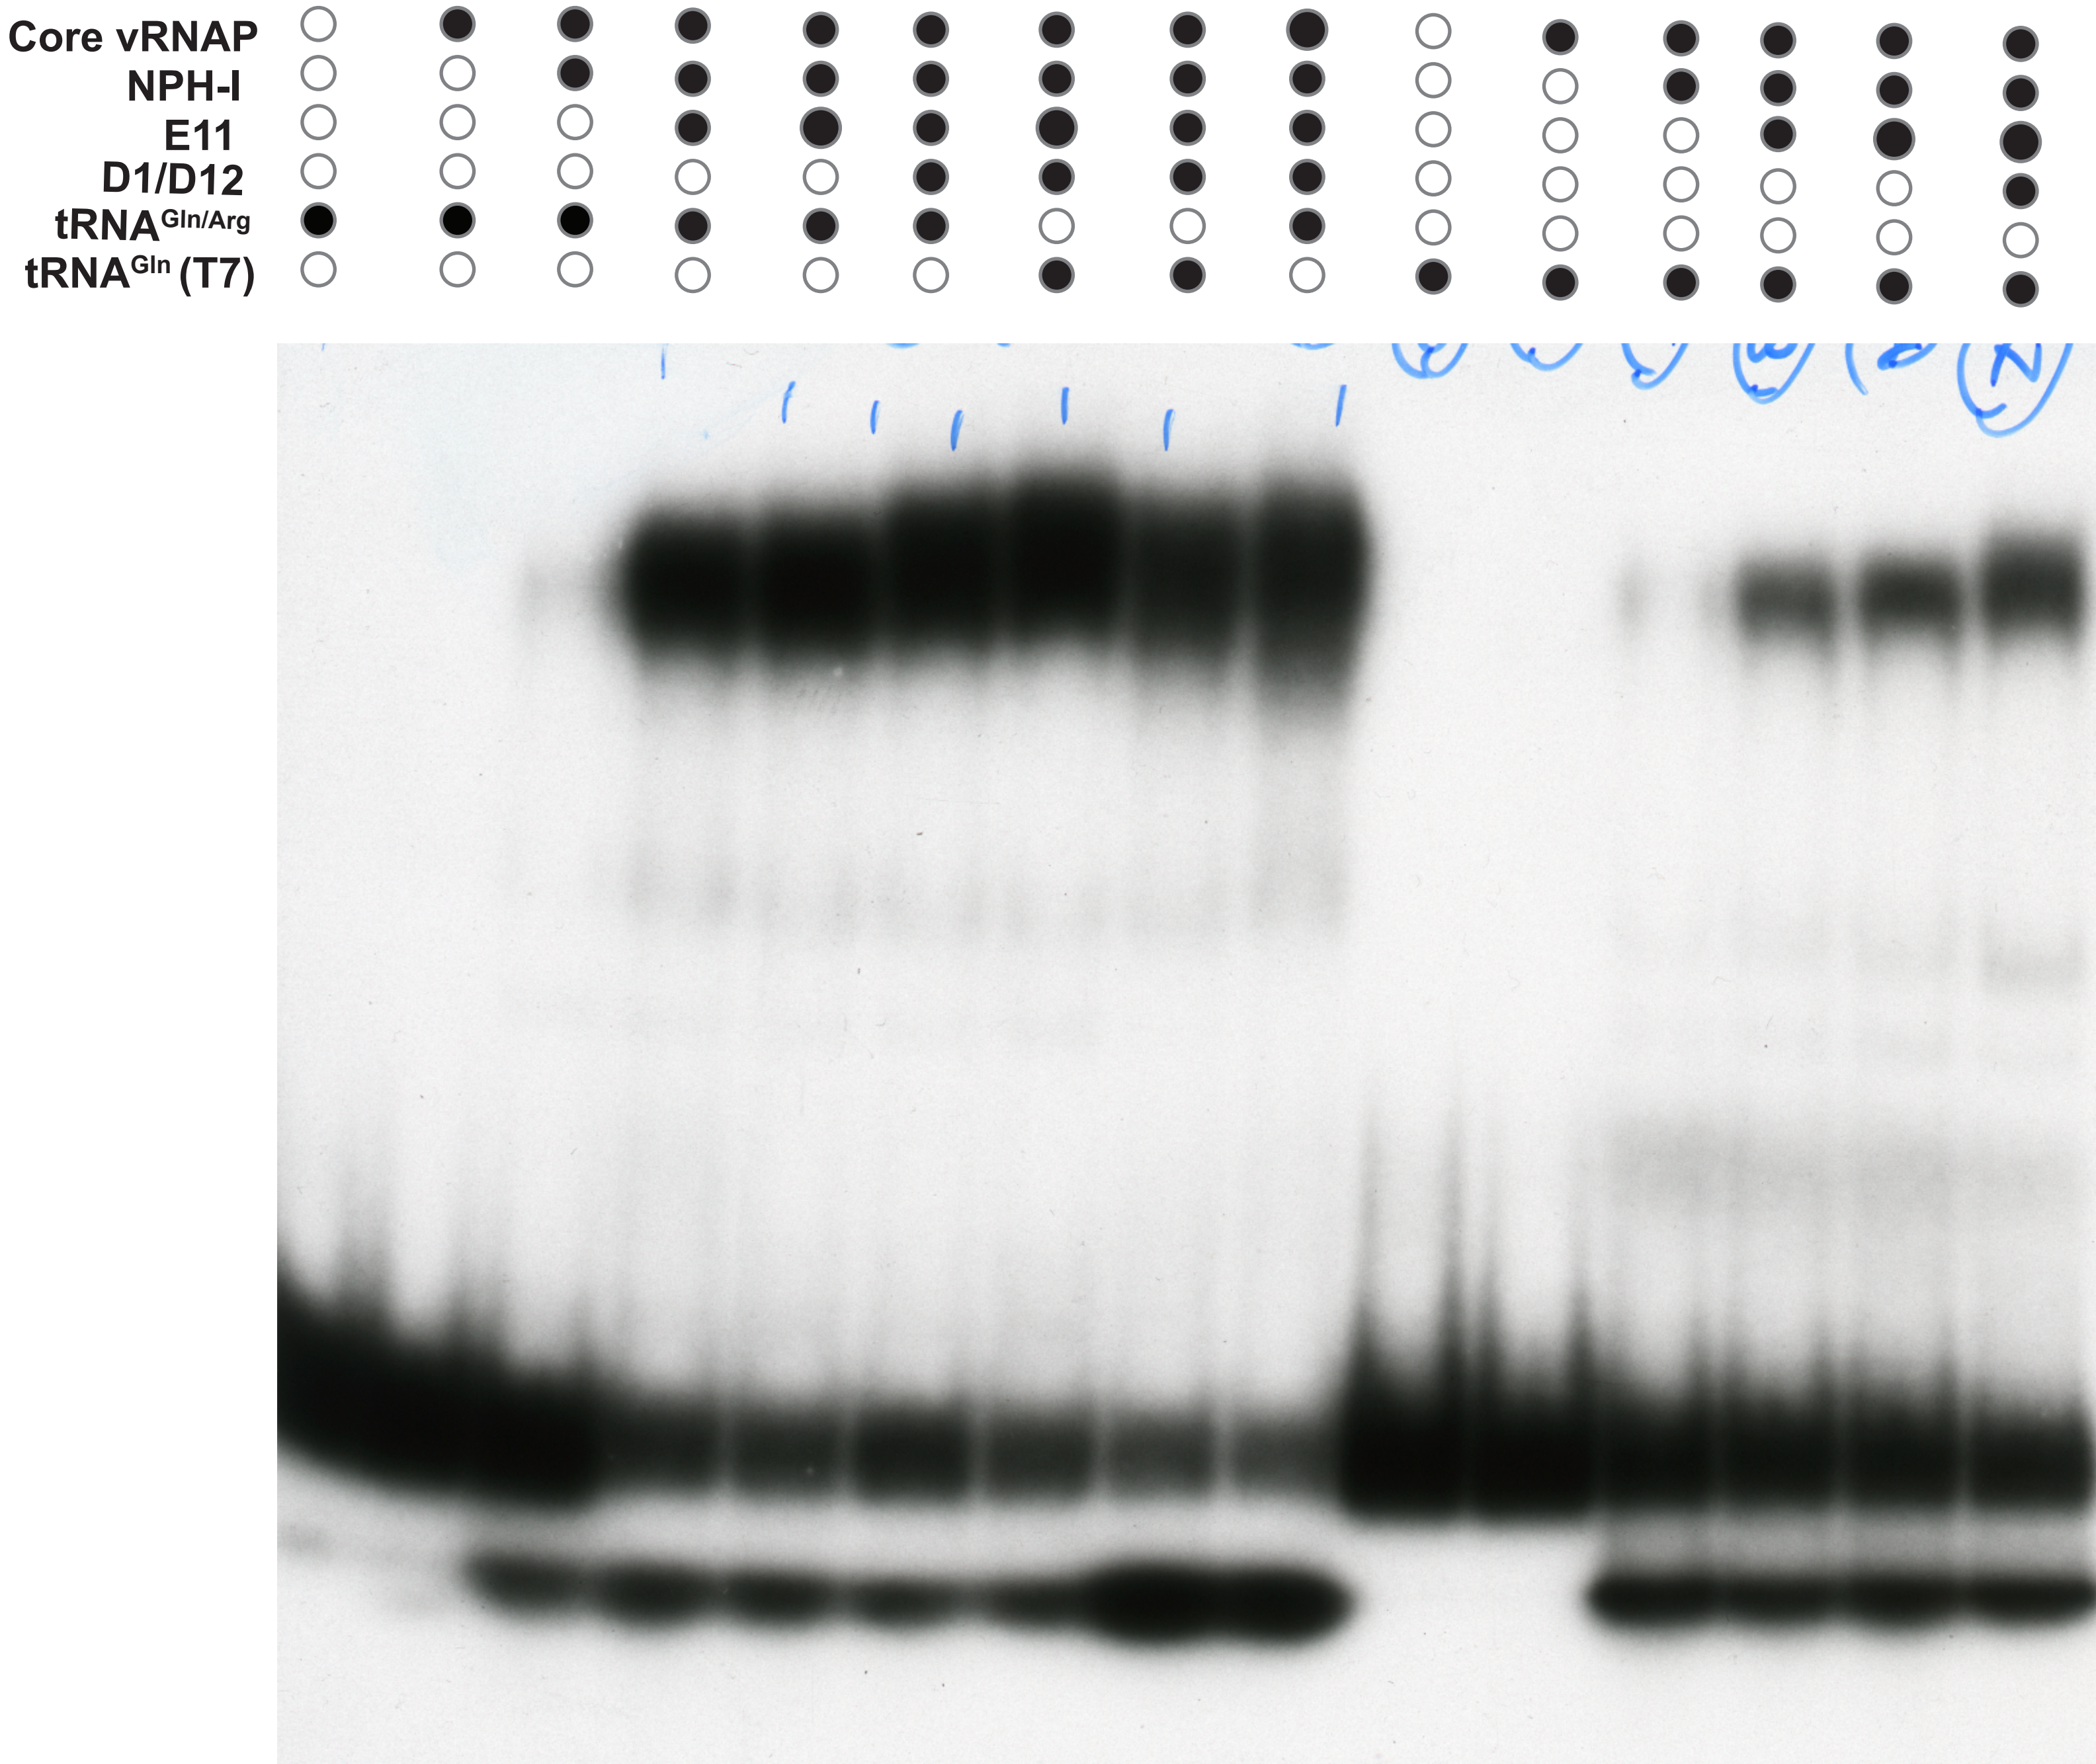



Fig.6E

Digestion of pCp-labeled tRNA<sup>Gln/Arg</sup>, tryzolized from complete vRNAP and total calf tRNAs by γ-Toxin

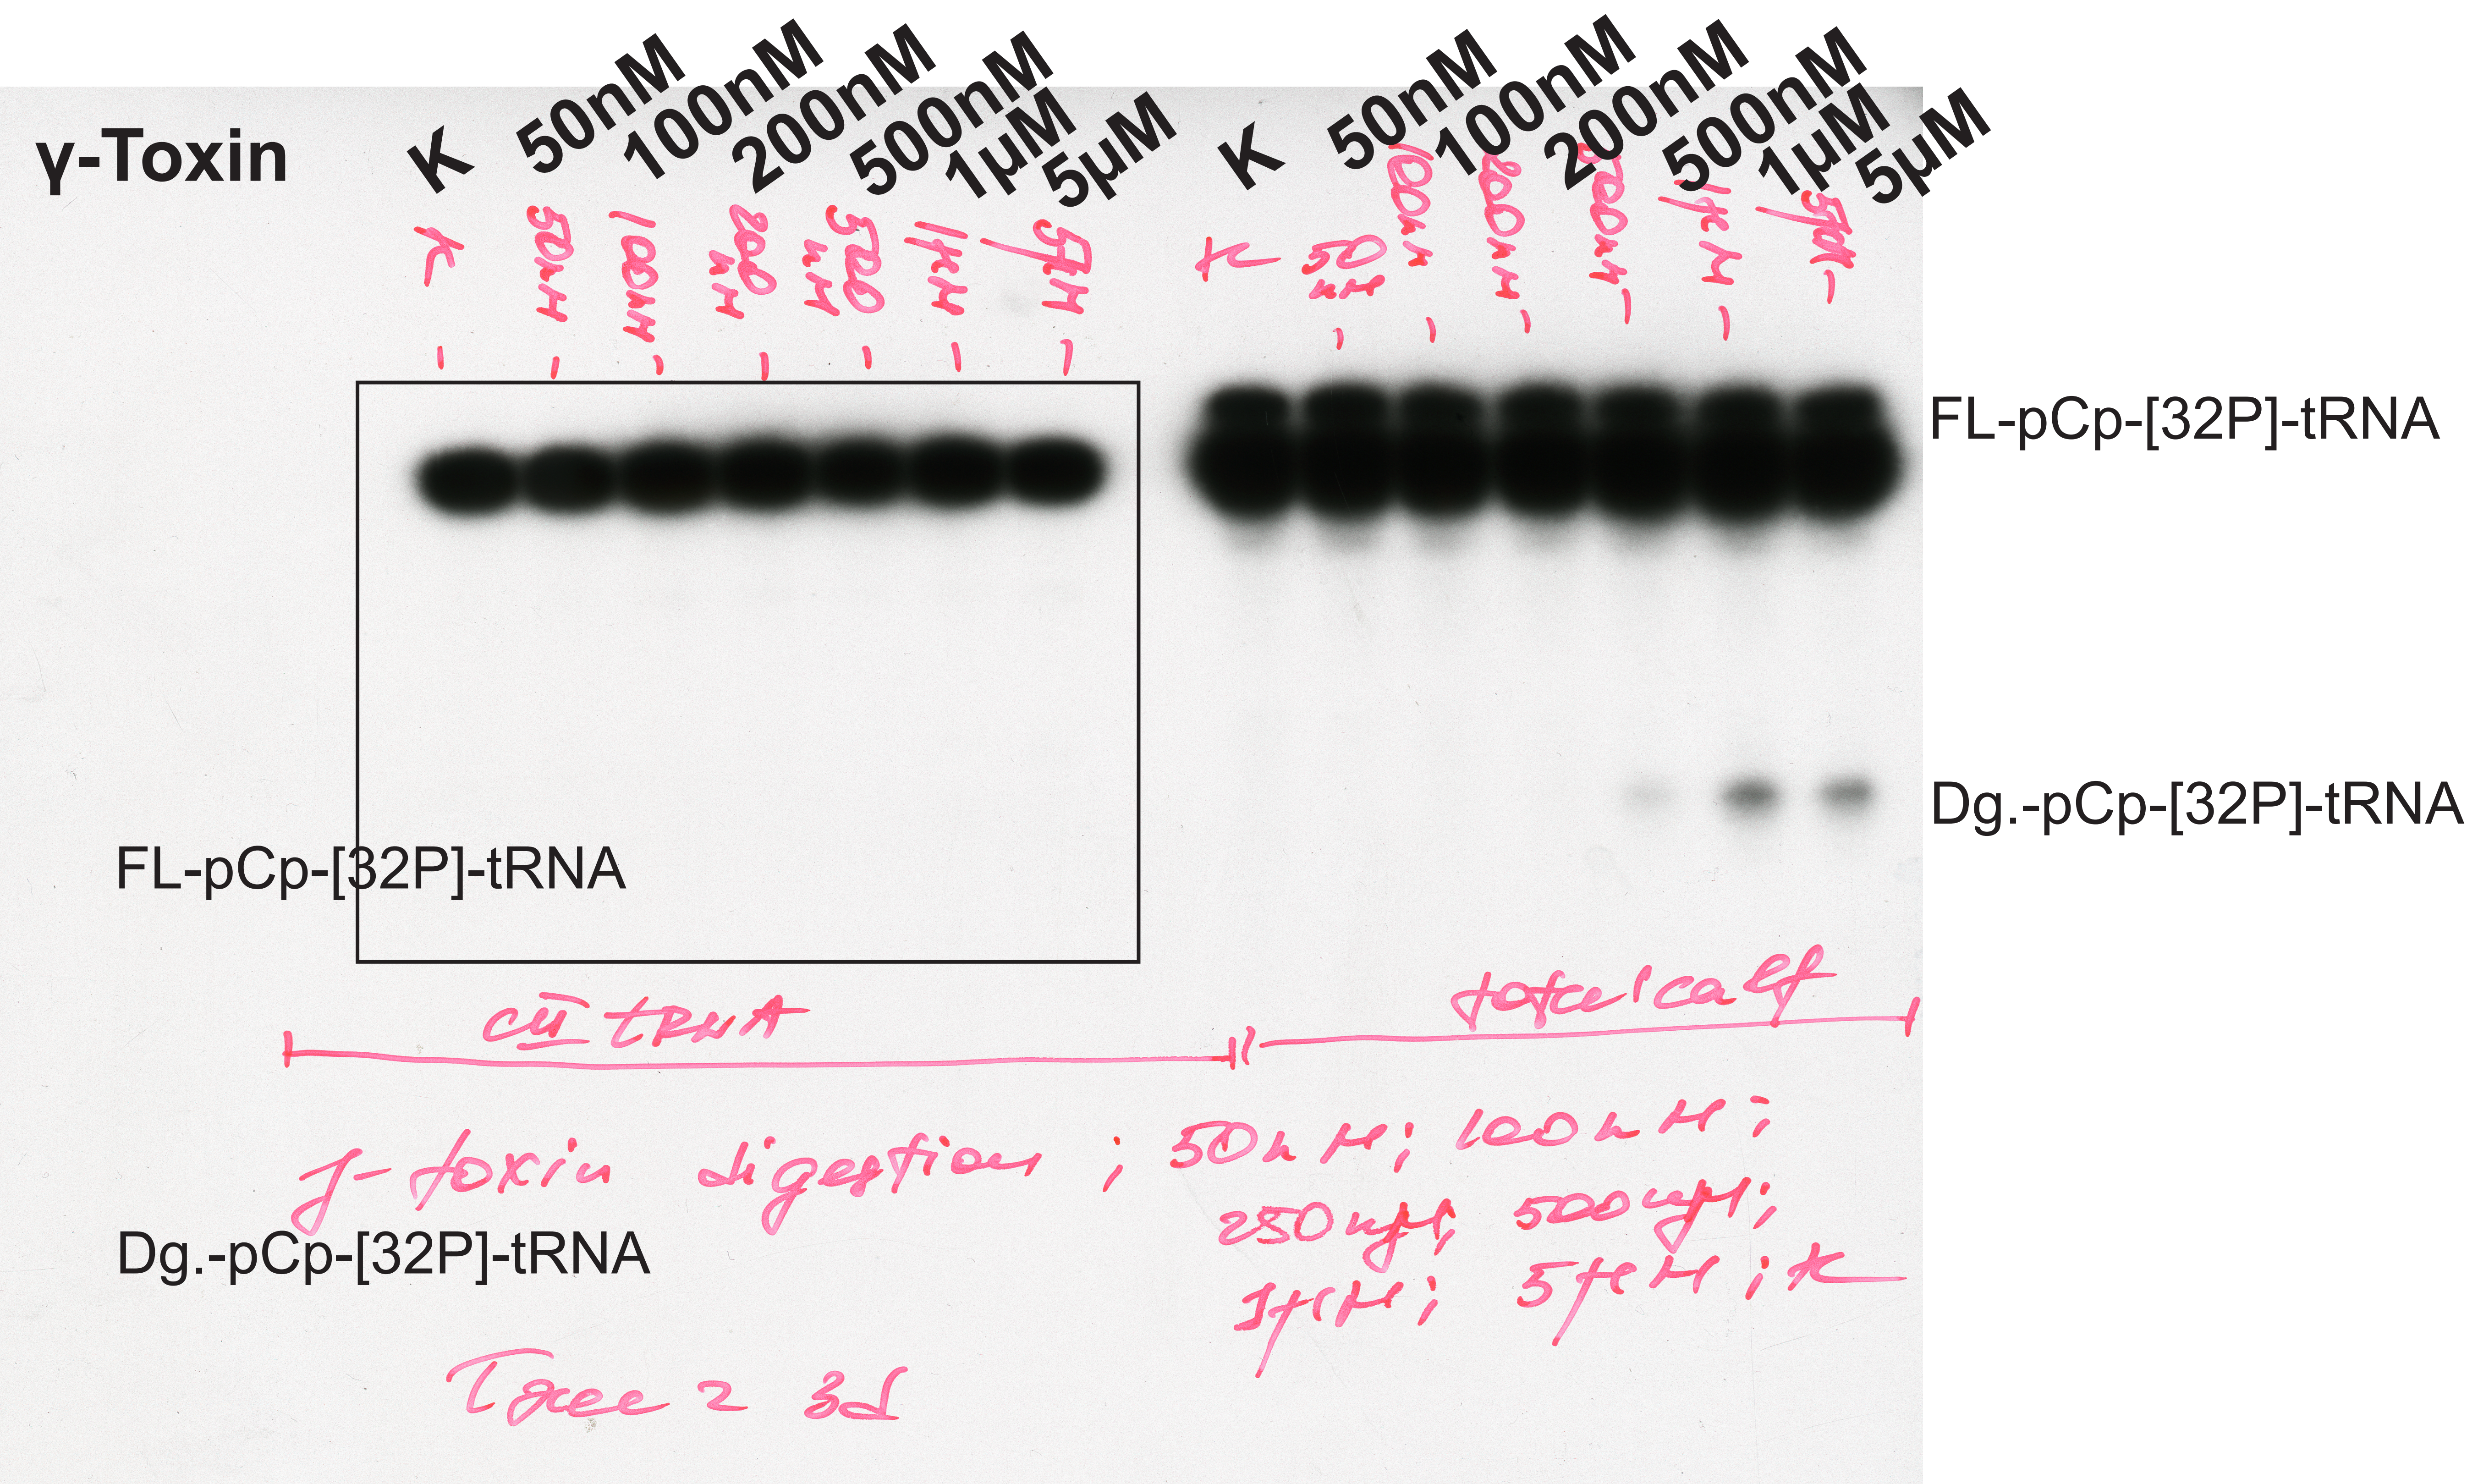

NB analysis of γ-Toxin digestion of tRNA<sup>Gln</sup>(UUG) from vaccinia virus infected Hela S3 cells

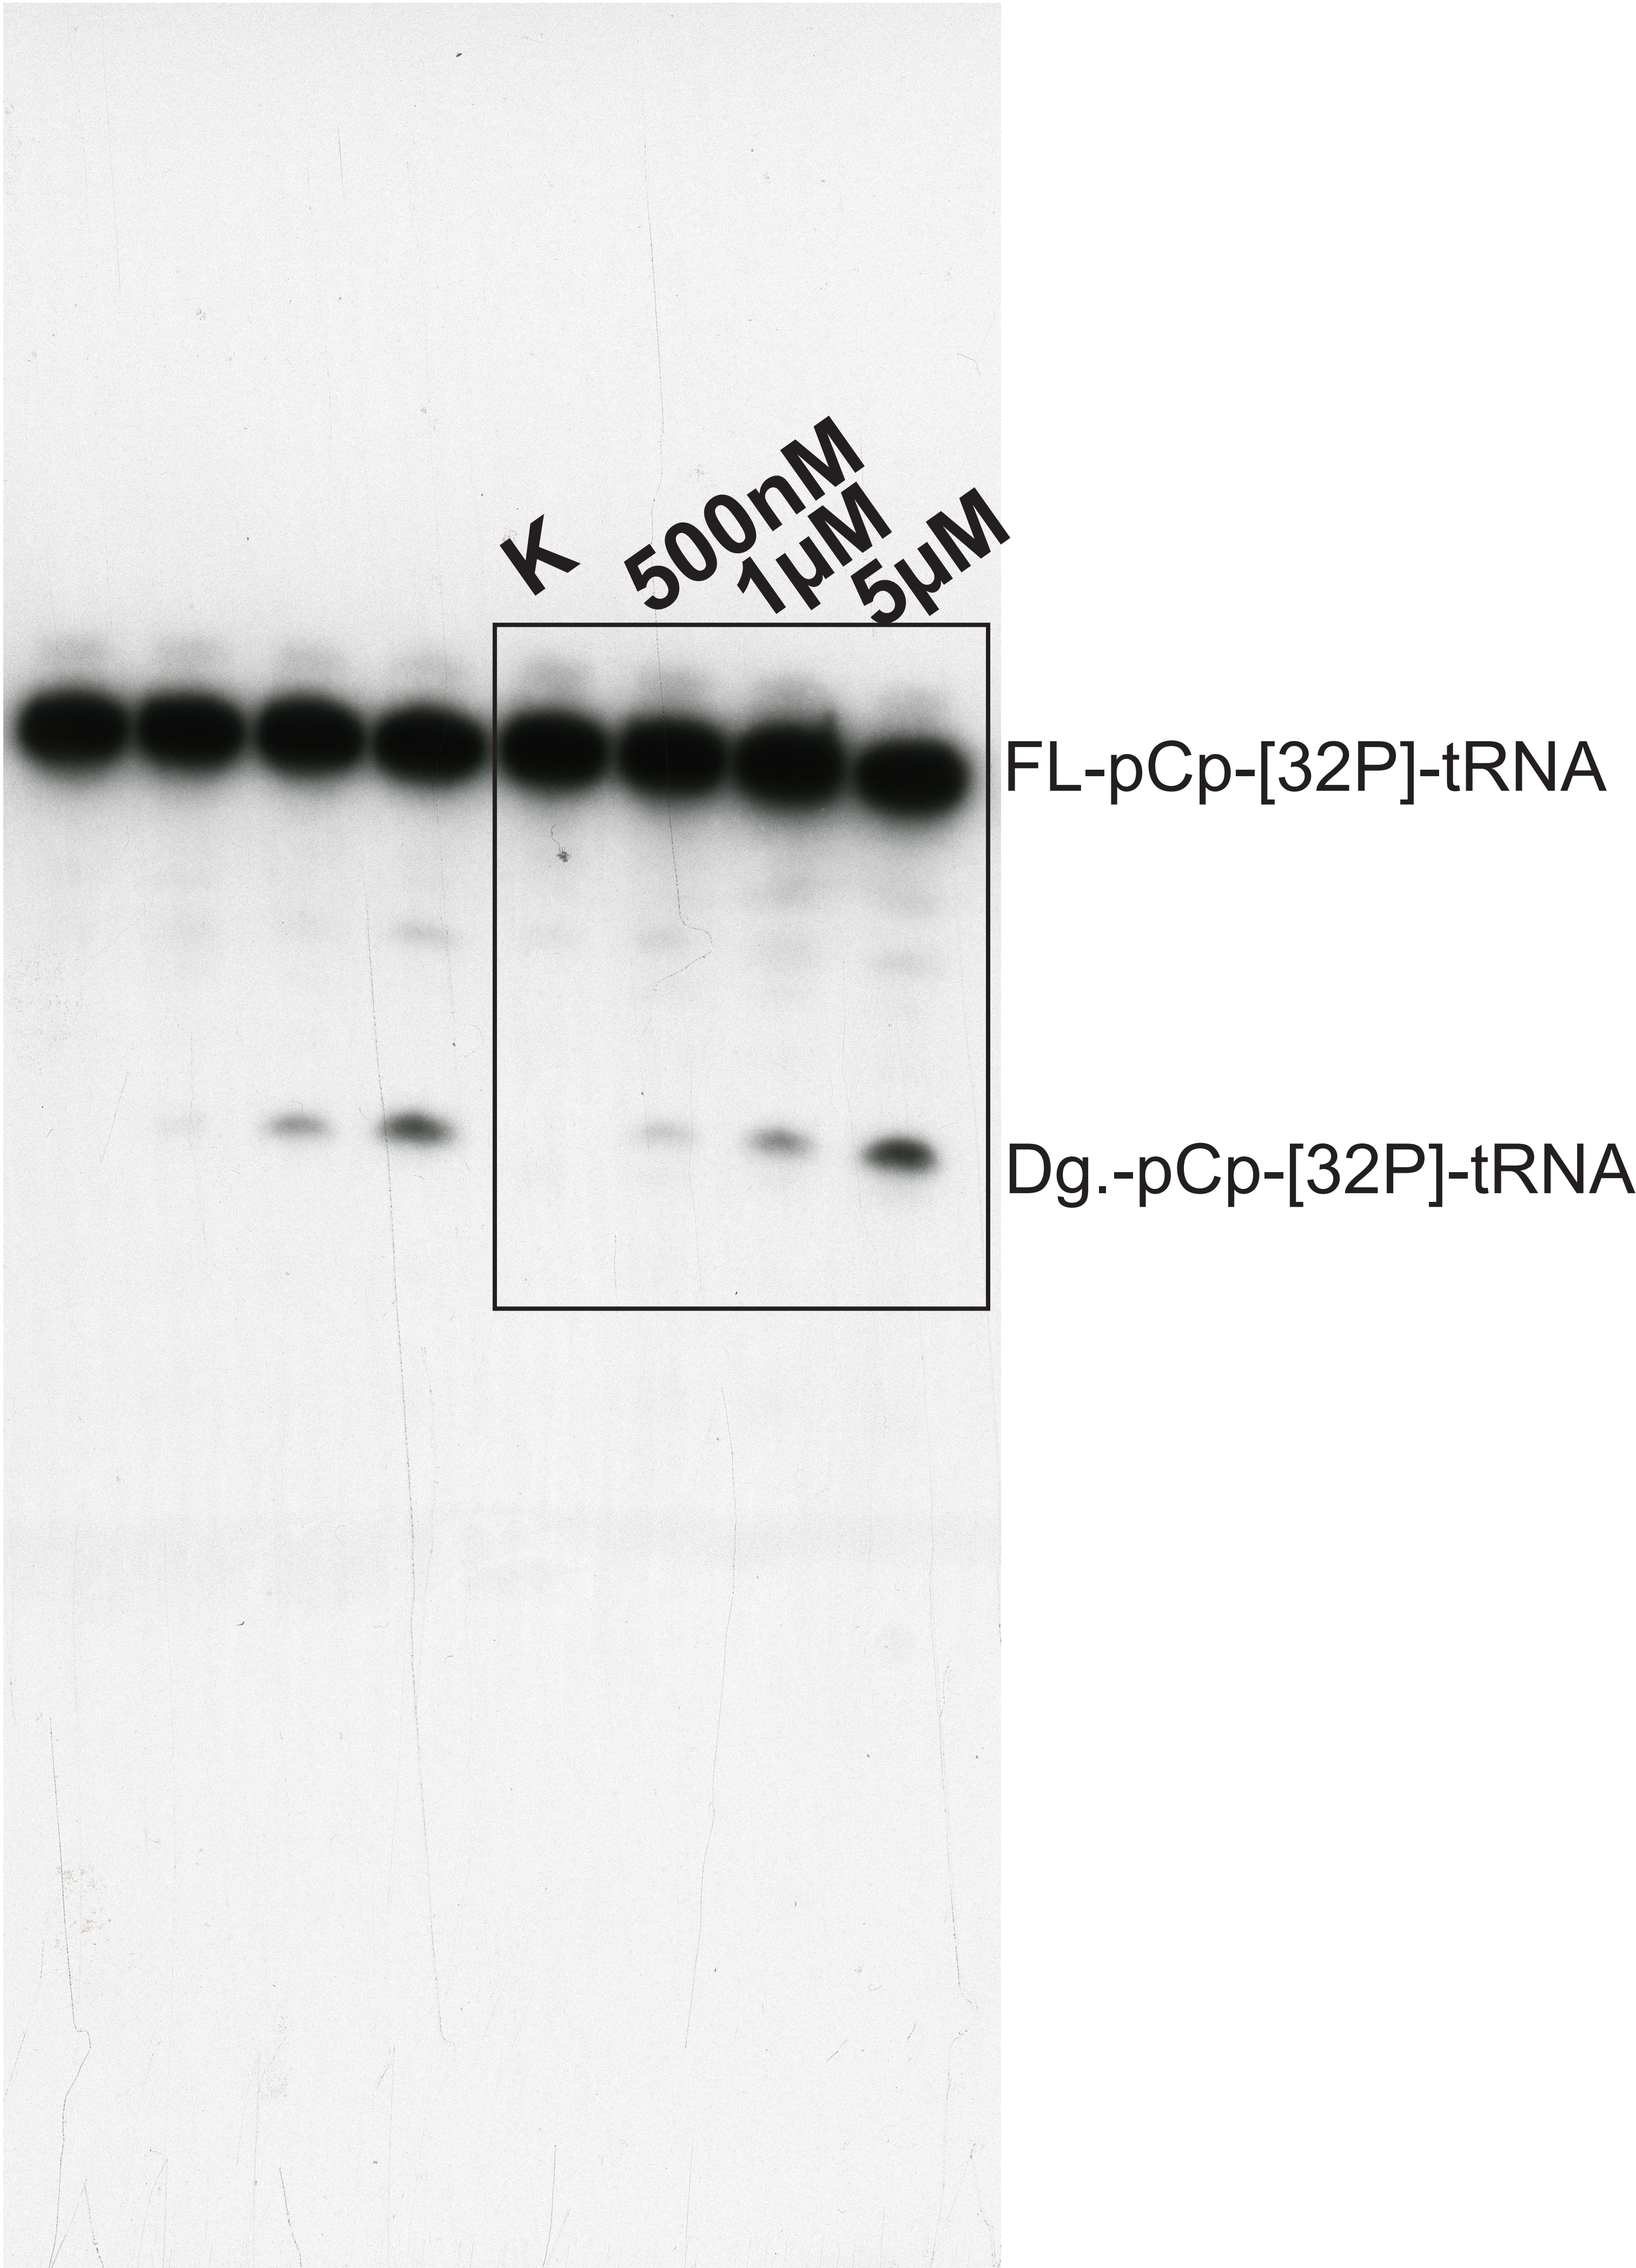

Supplement: MOESM9 [file 41594_2025_1653_MOESM9_ESM.pdf › 41594_2025_1653_MOESM9_ESM.pdf]
