# Supplementary material for: tRNA as an assembly chaperone for a macromolecular transcription-processing complex
Source: Springer Nature journal article supplement (doi:10.1038/s41594-025-01653-y), 2025-09-04

Fig.8C

Nothern Blot analysis of MPVX vs VACV for tRNA<sup>Gln</sup> (UUG)

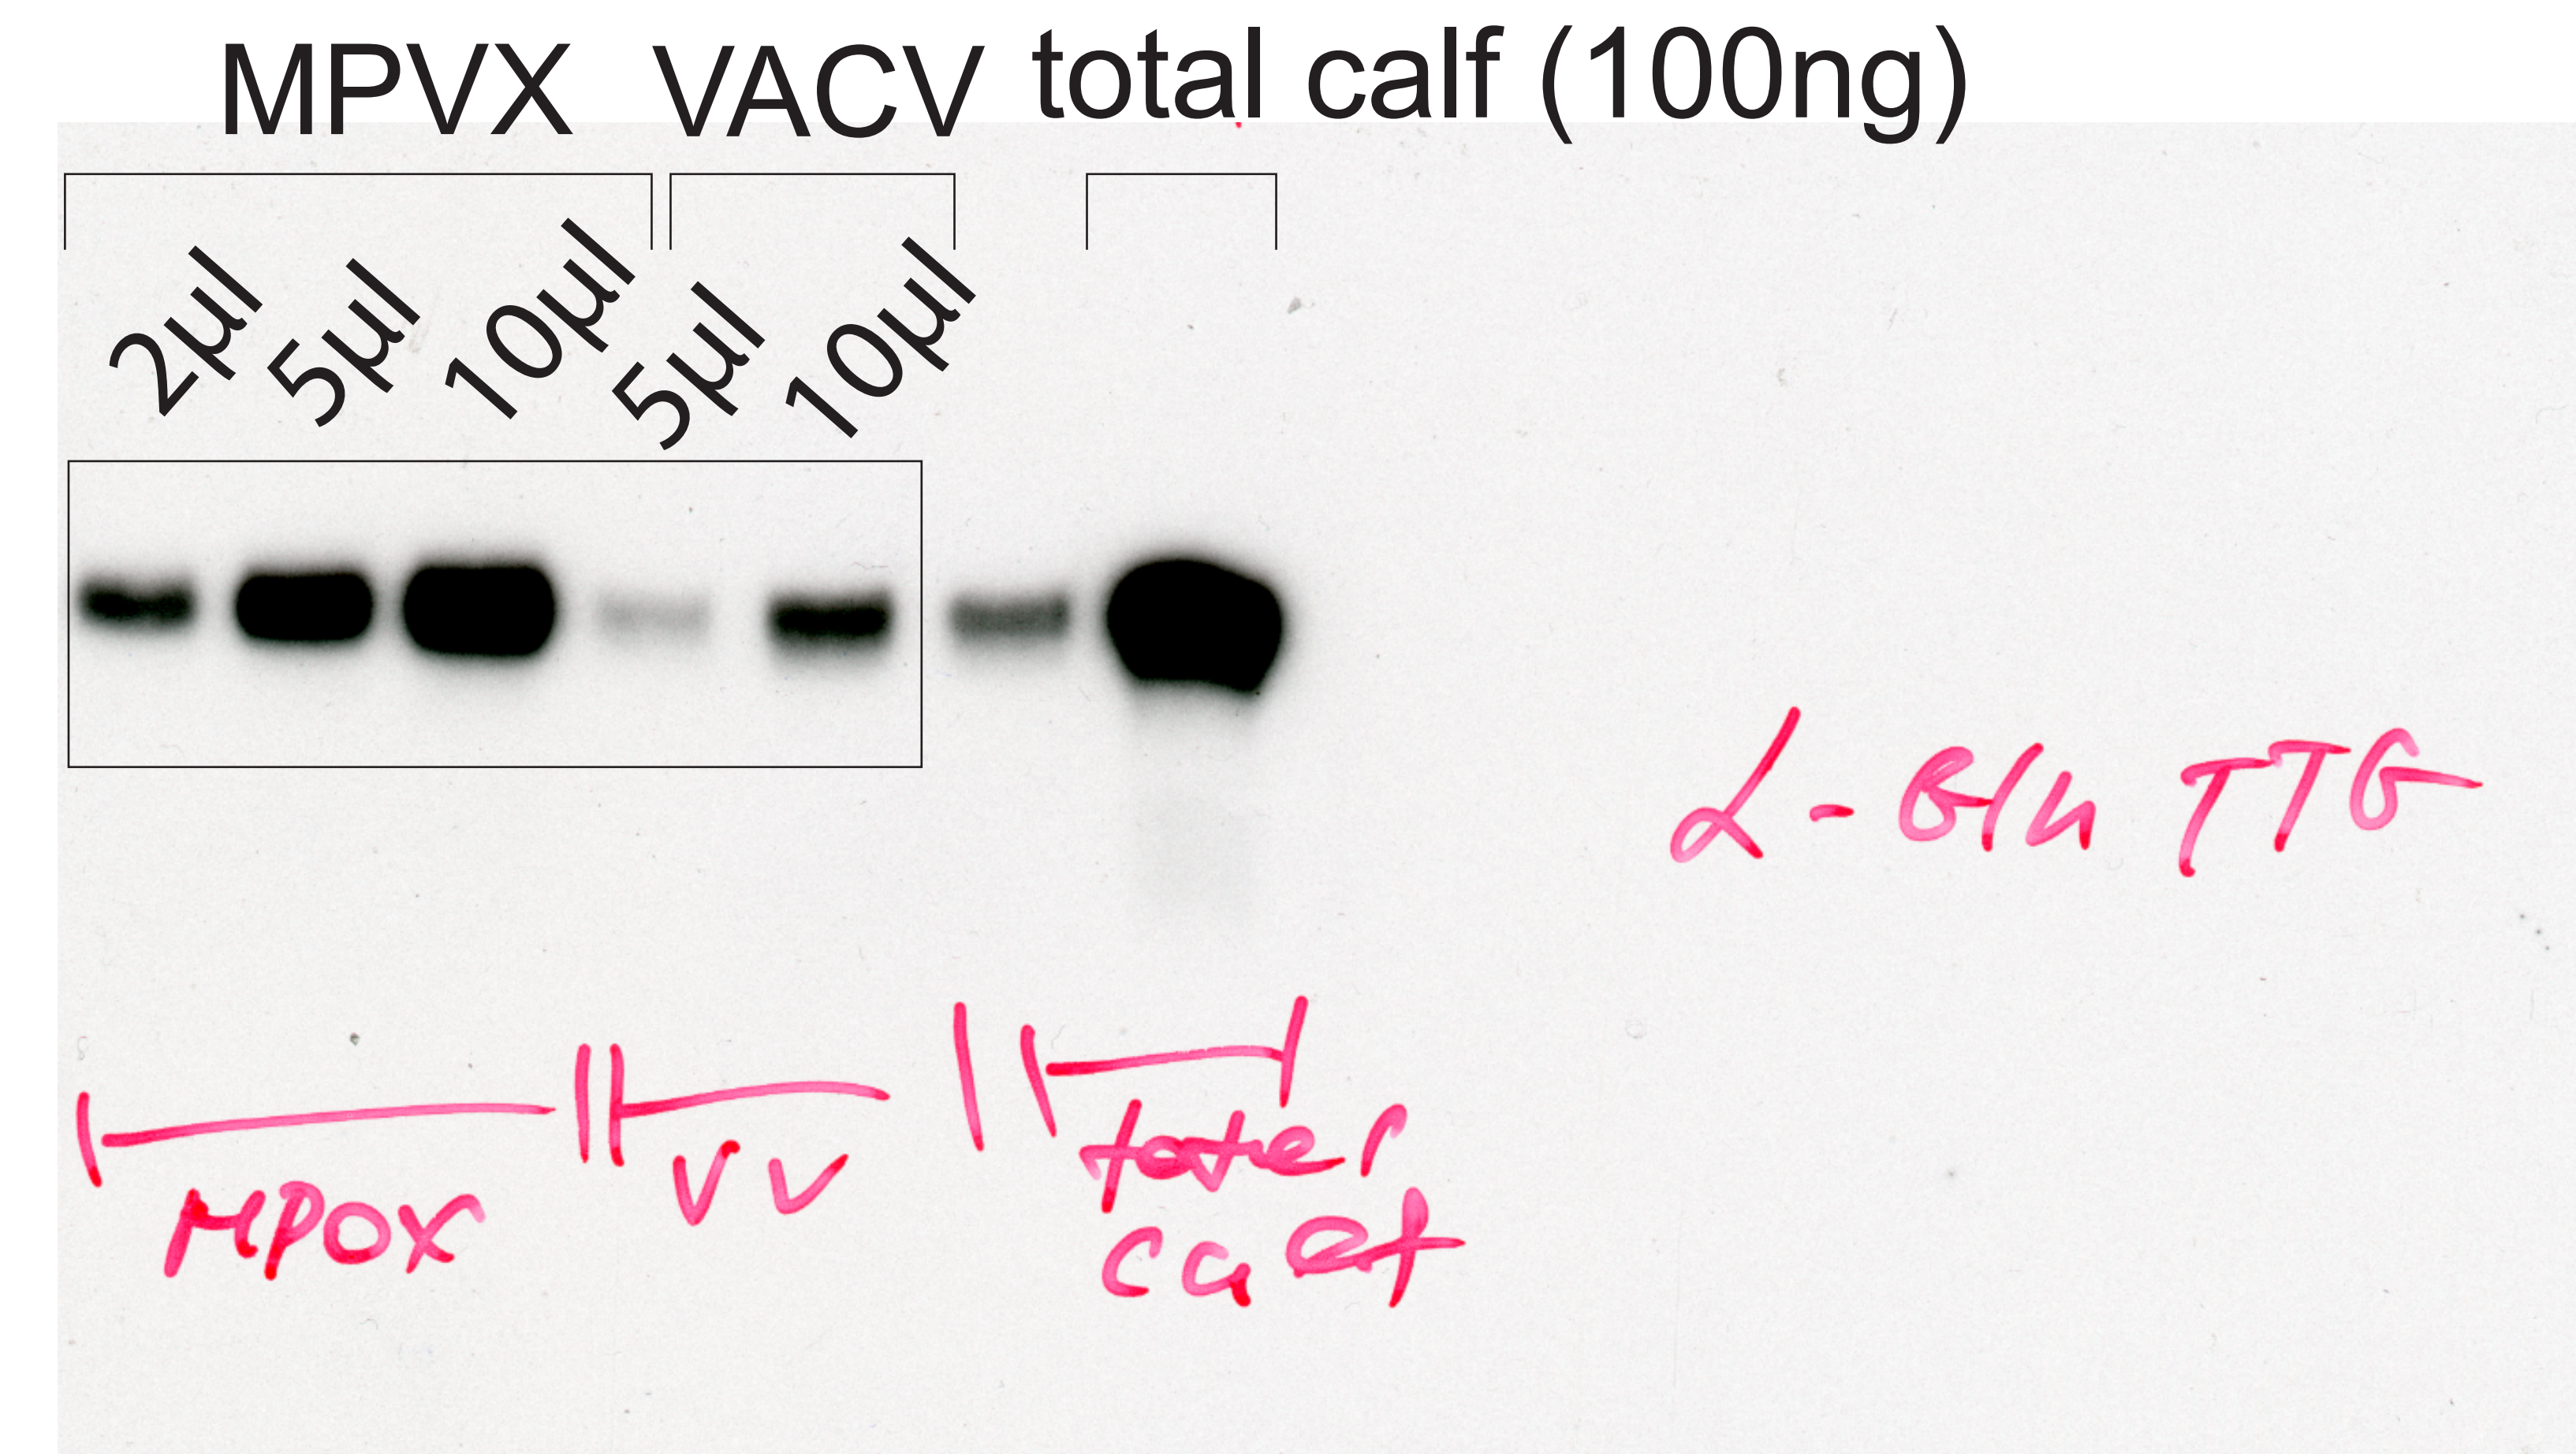

Nothern Blot analysis of MPVX vs VACV for tRNA<sup>Ser</sup> (CGA)

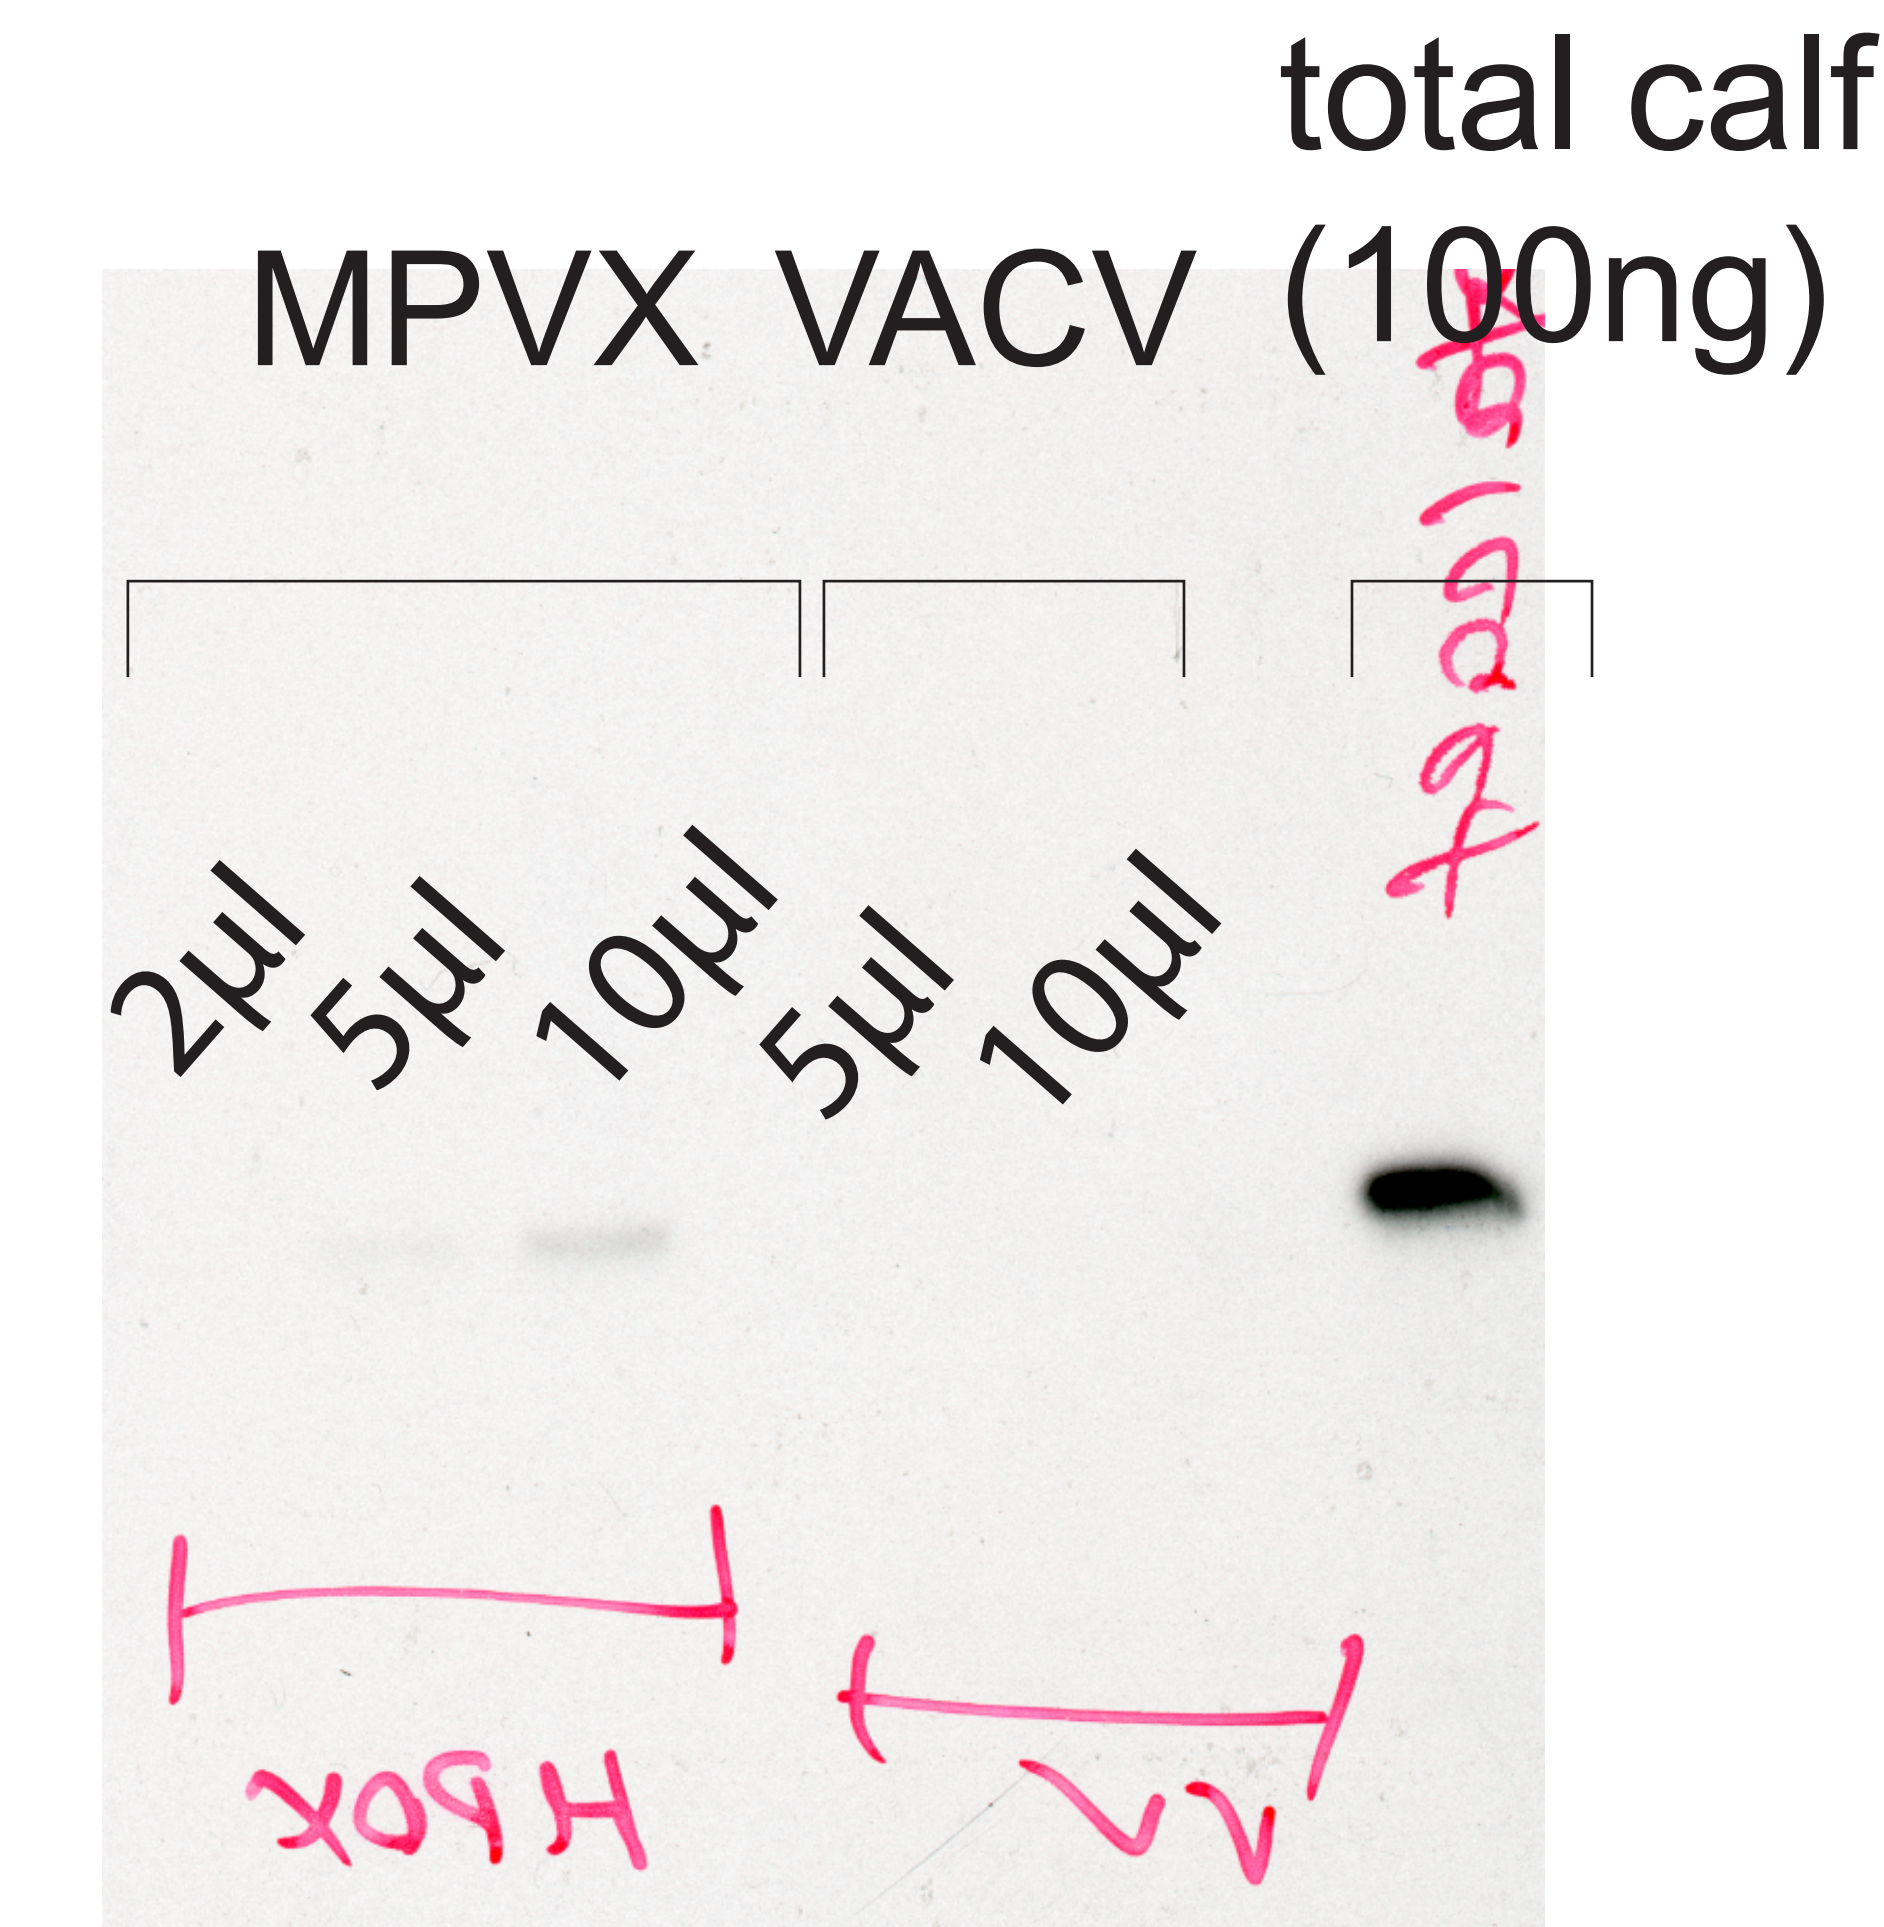

Nothern Blot analysis of MPVX vs VACV for tRNA<sup>arg</sup> (CCG)

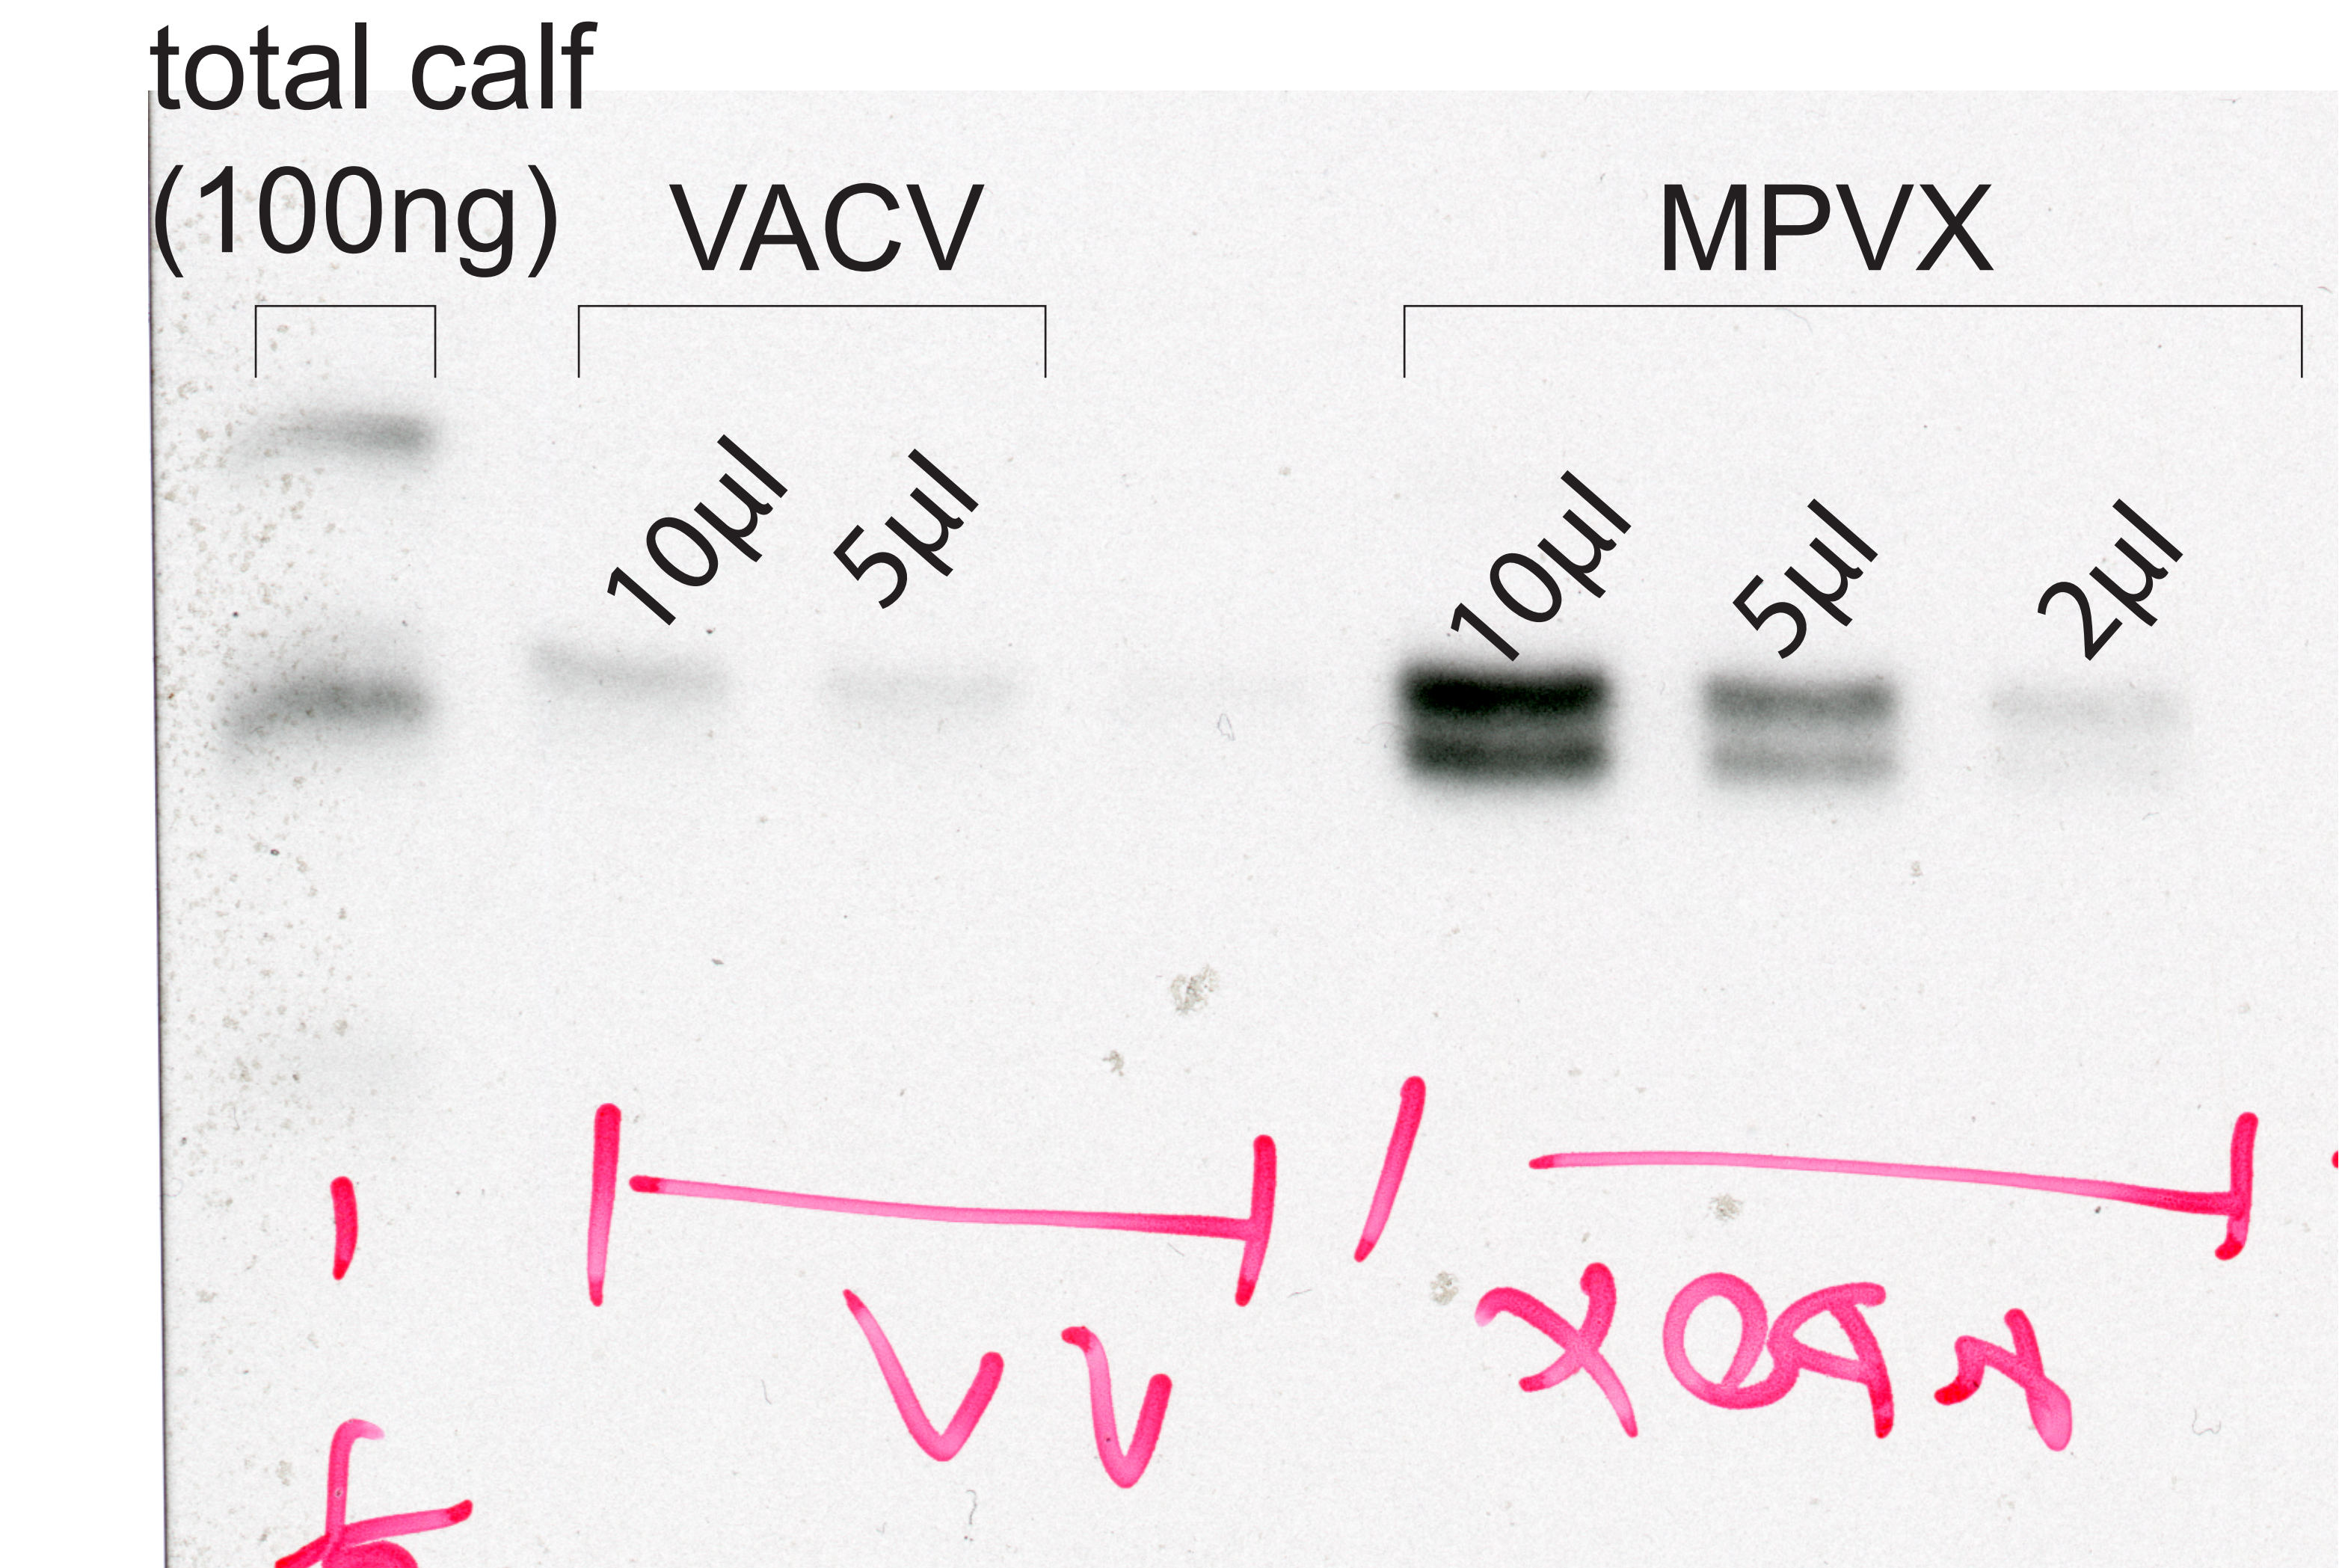

Supplement: MOESM10 [file 41594_2025_1653_MOESM10_ESM.pdf › 41594_2025_1653_MOESM10_ESM.pdf]
