# Supplementary material for: tRNA as an assembly chaperone for a macromolecular transcription-processing complex
Source: Springer Nature journal article supplement (doi:10.1038/s41594-025-01653-y), 2025-09-04

# Extended Data Fig.1A

## CE E.coli Expression (Superdex 200)

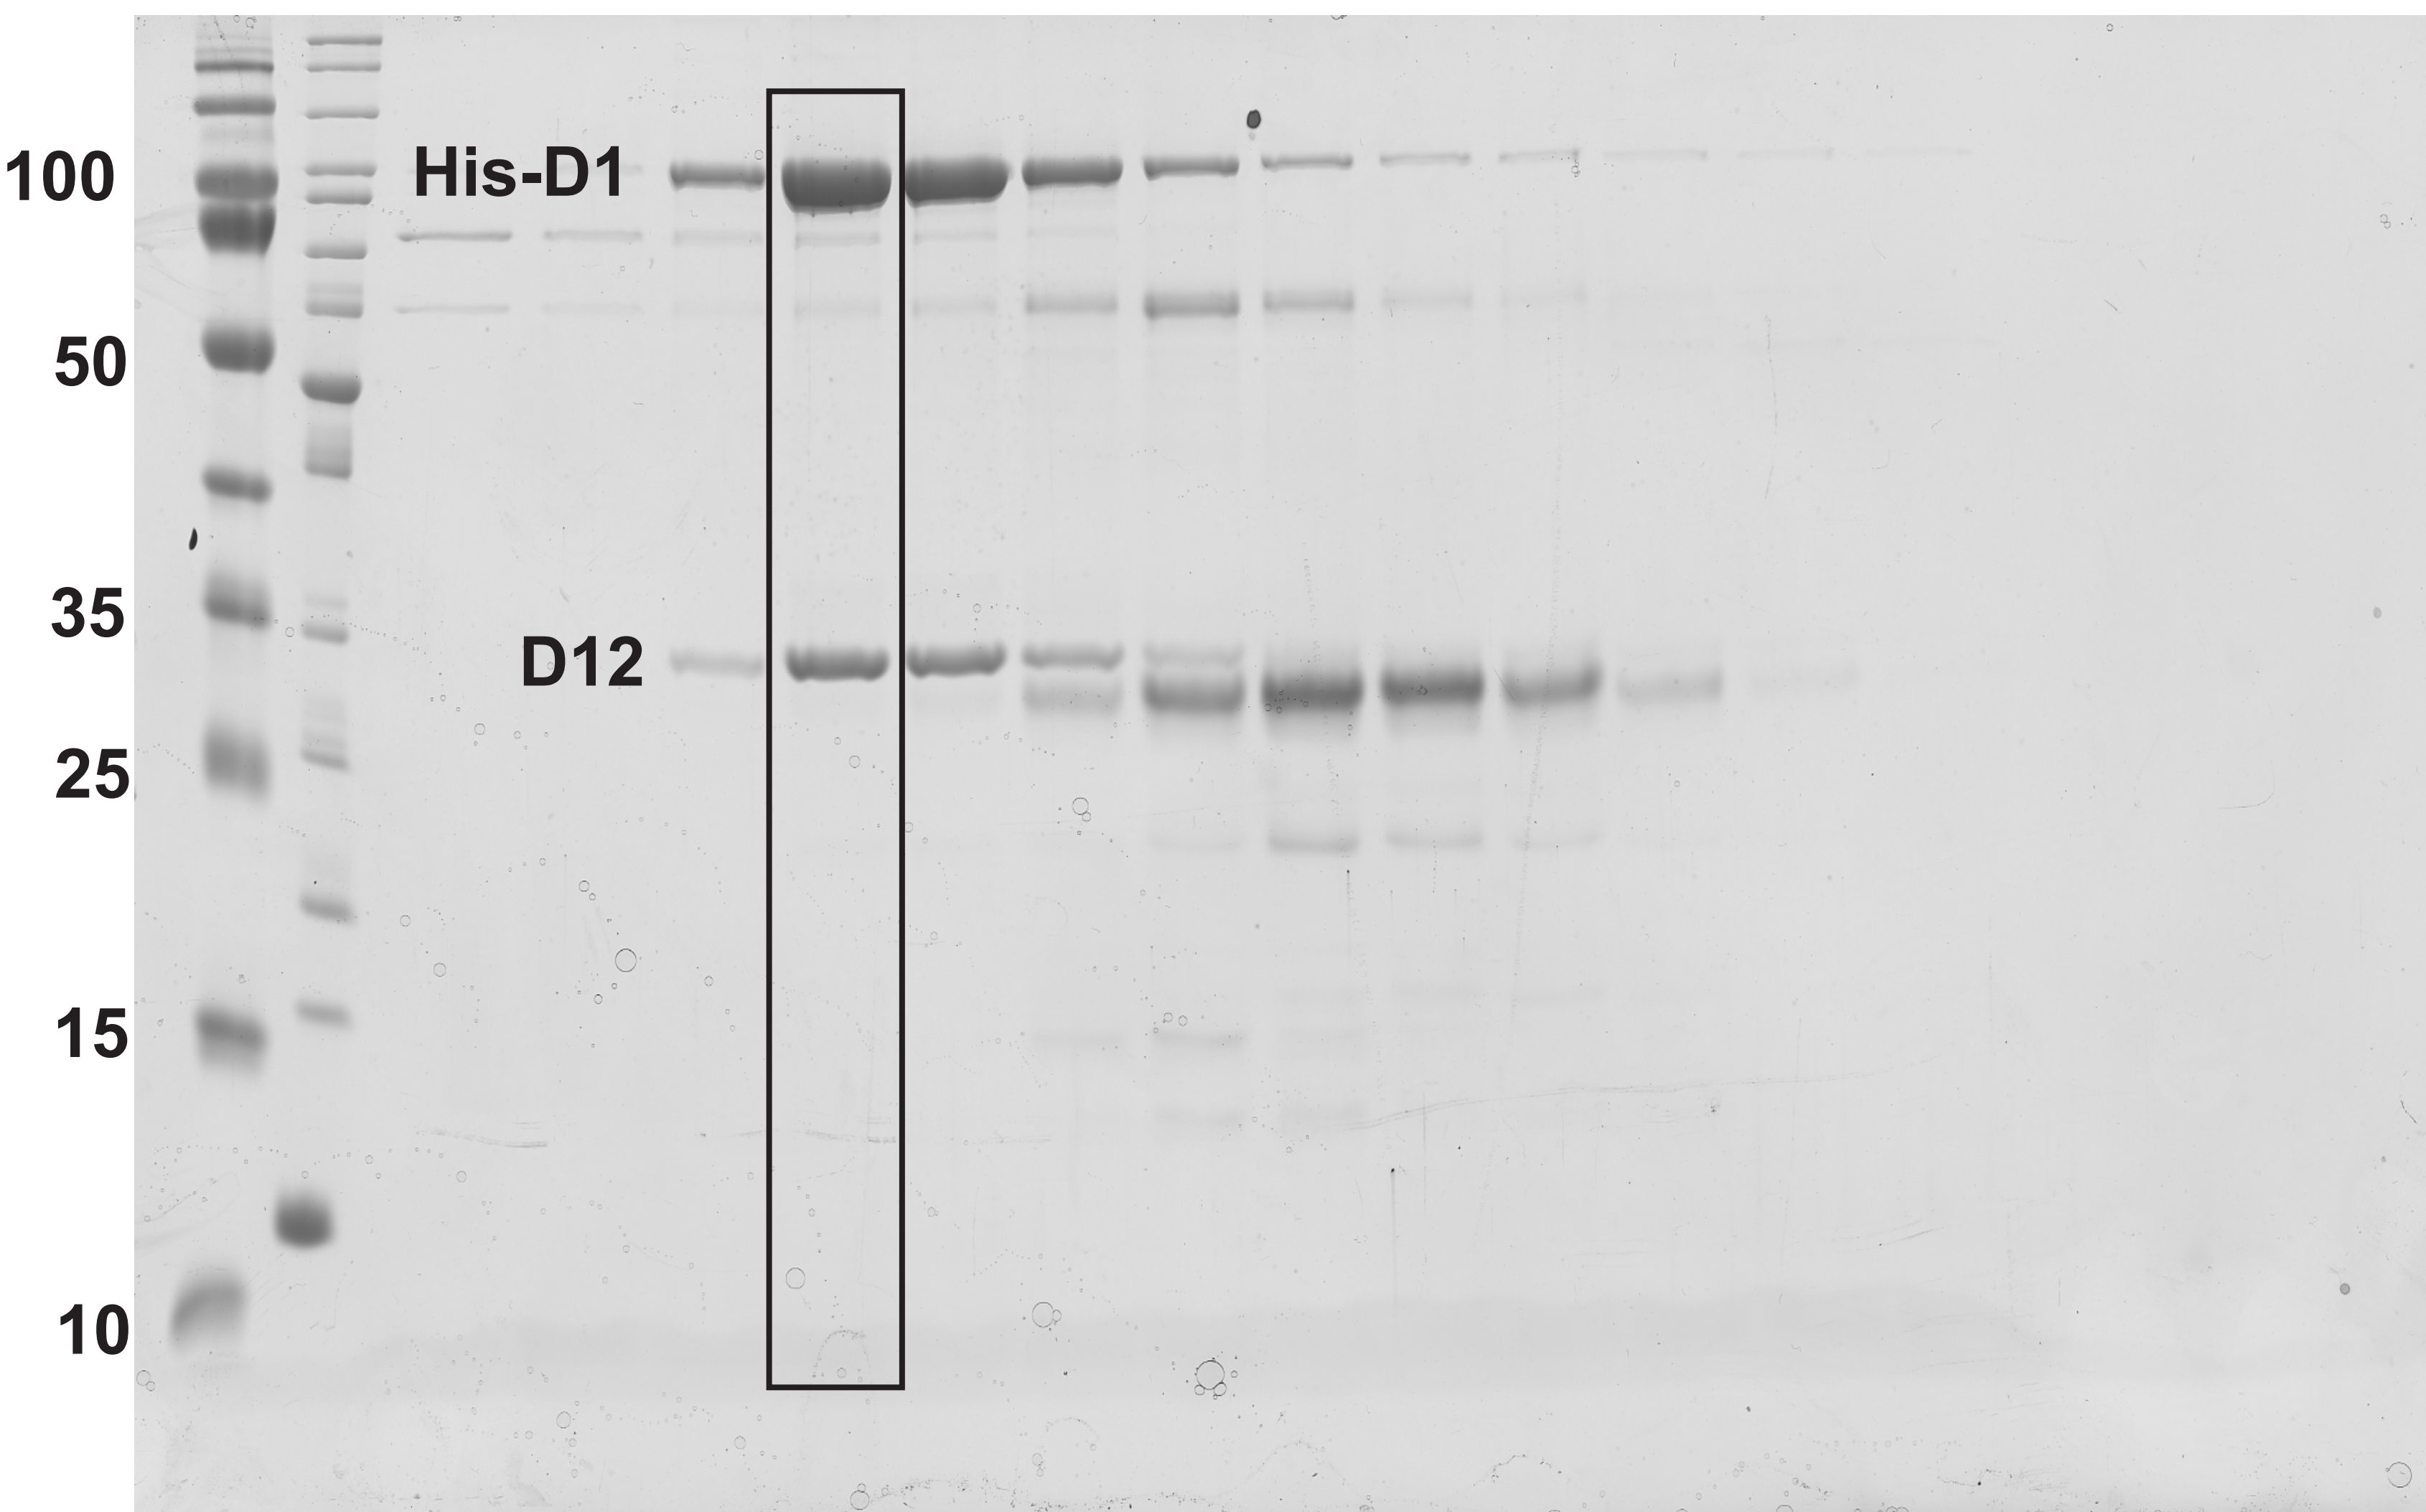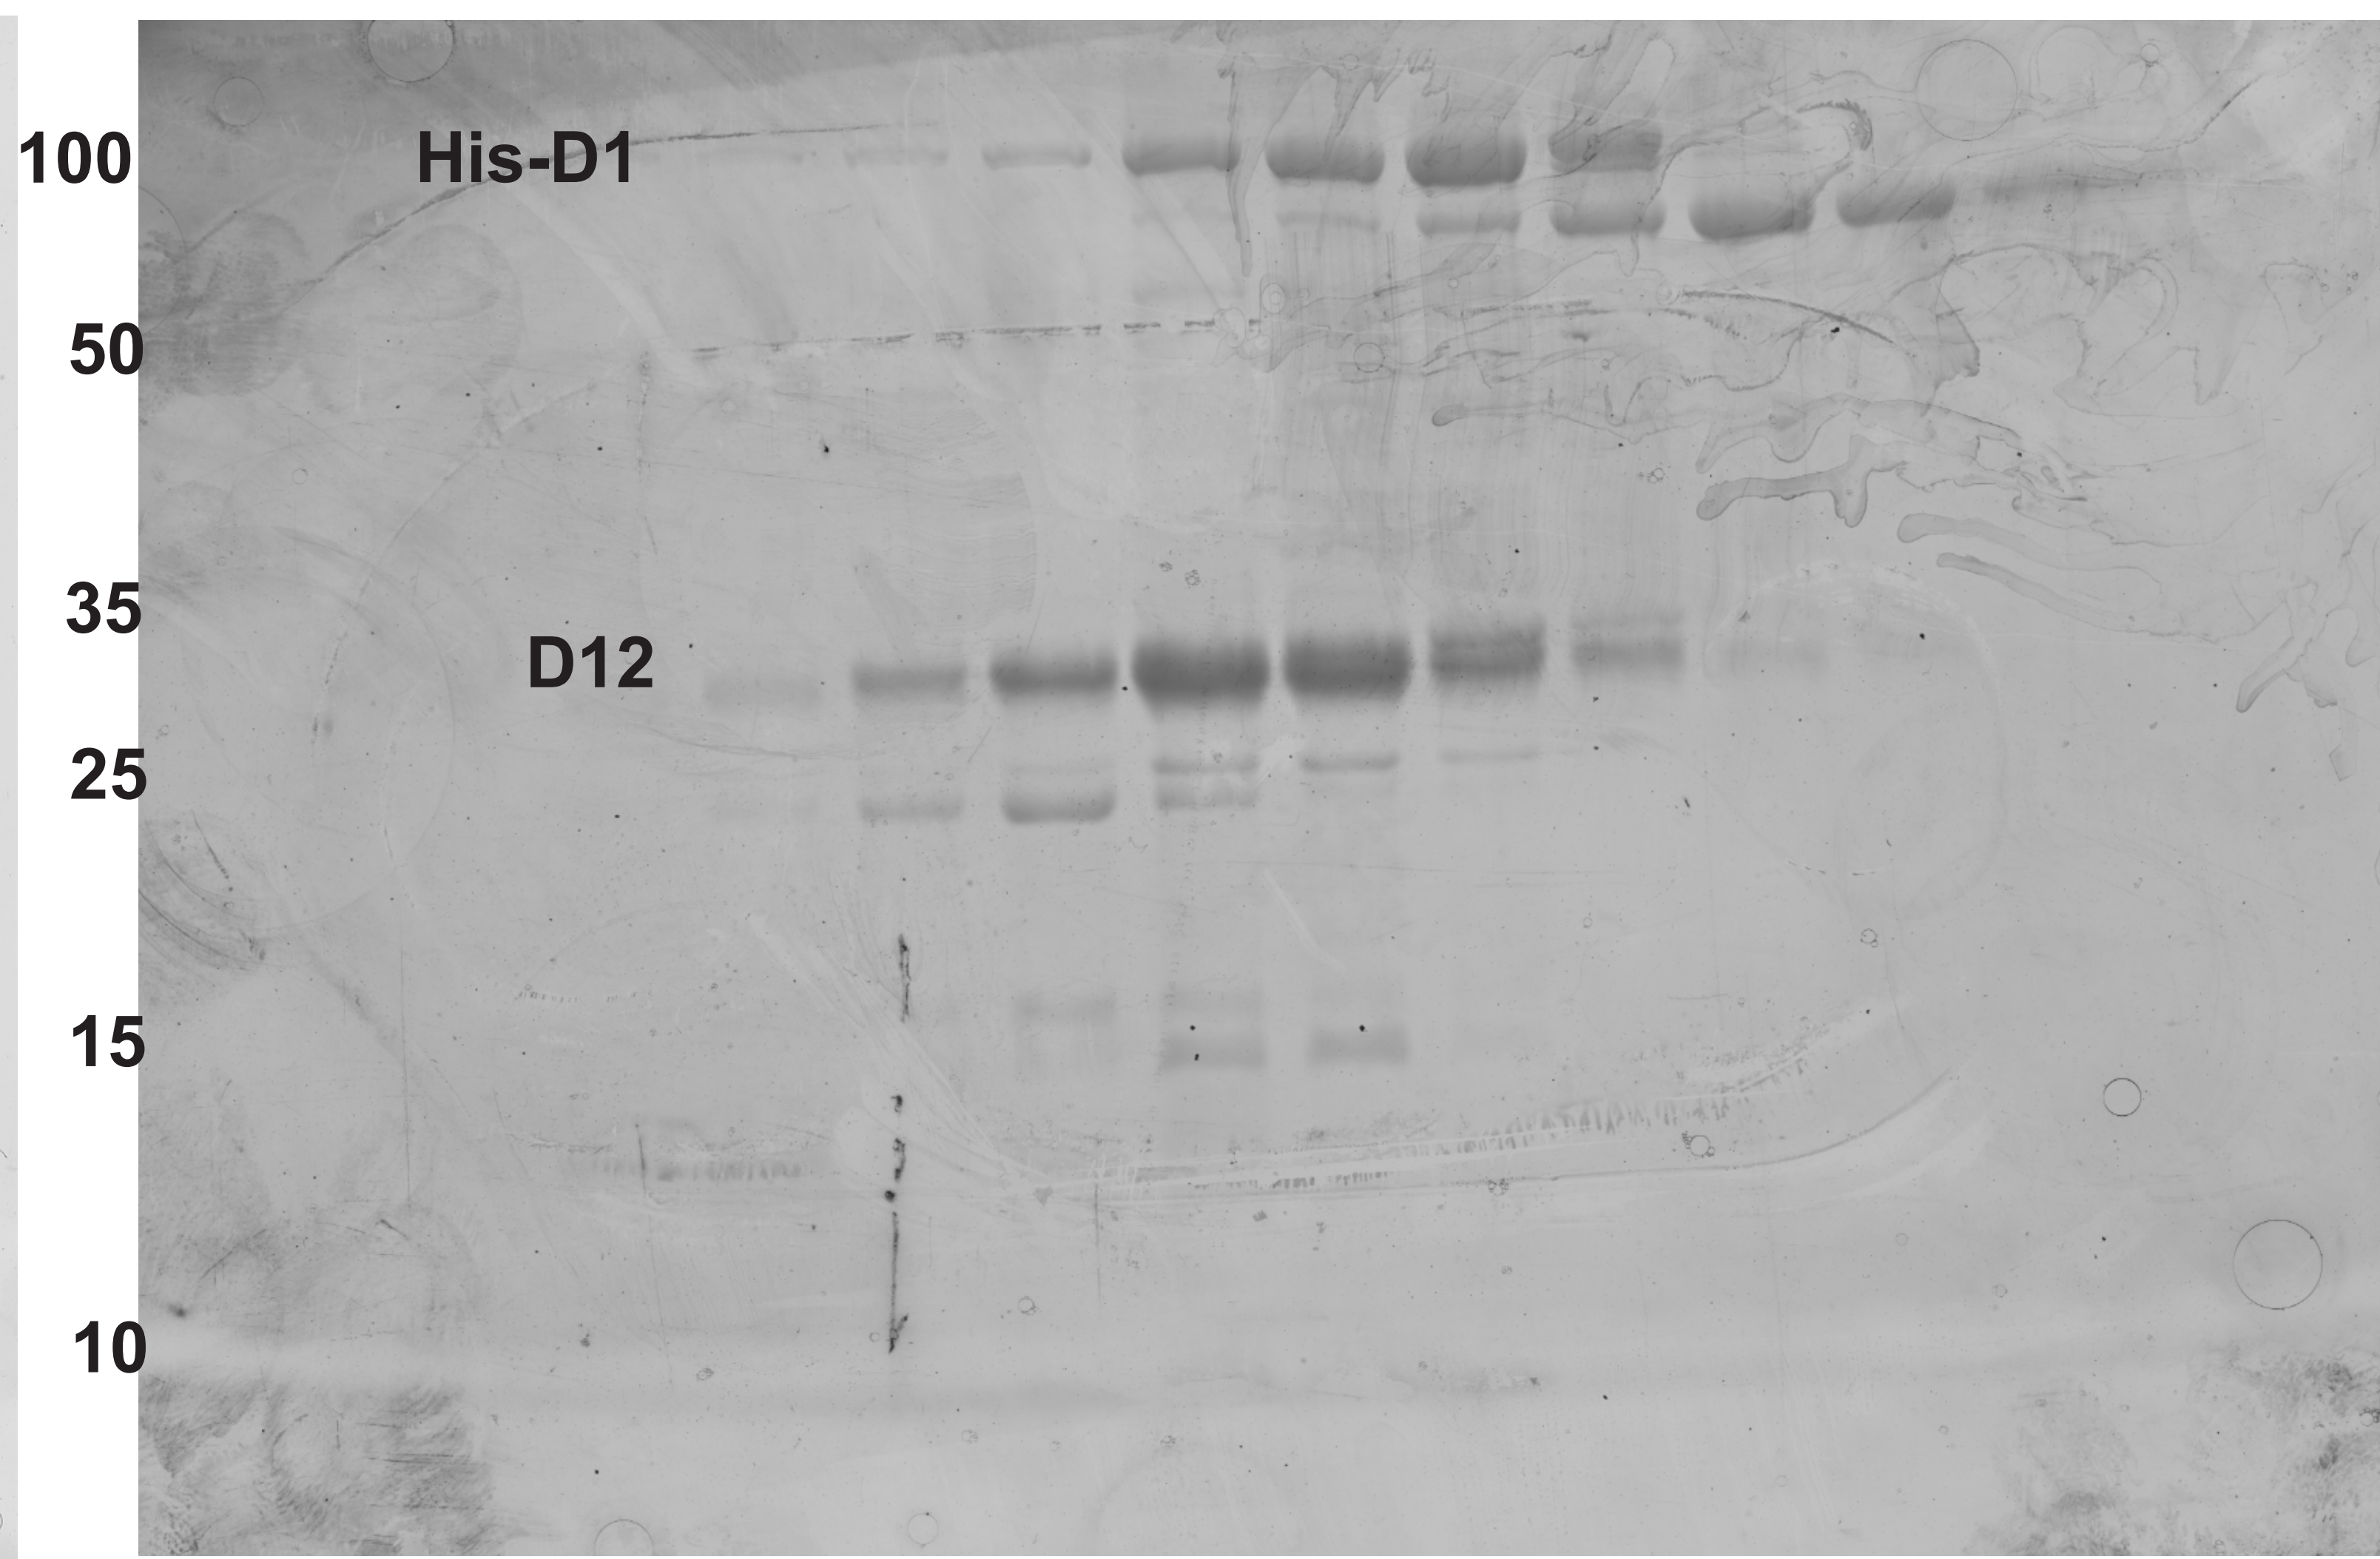

## NPH-I E.coli Expression (Superdex 200)

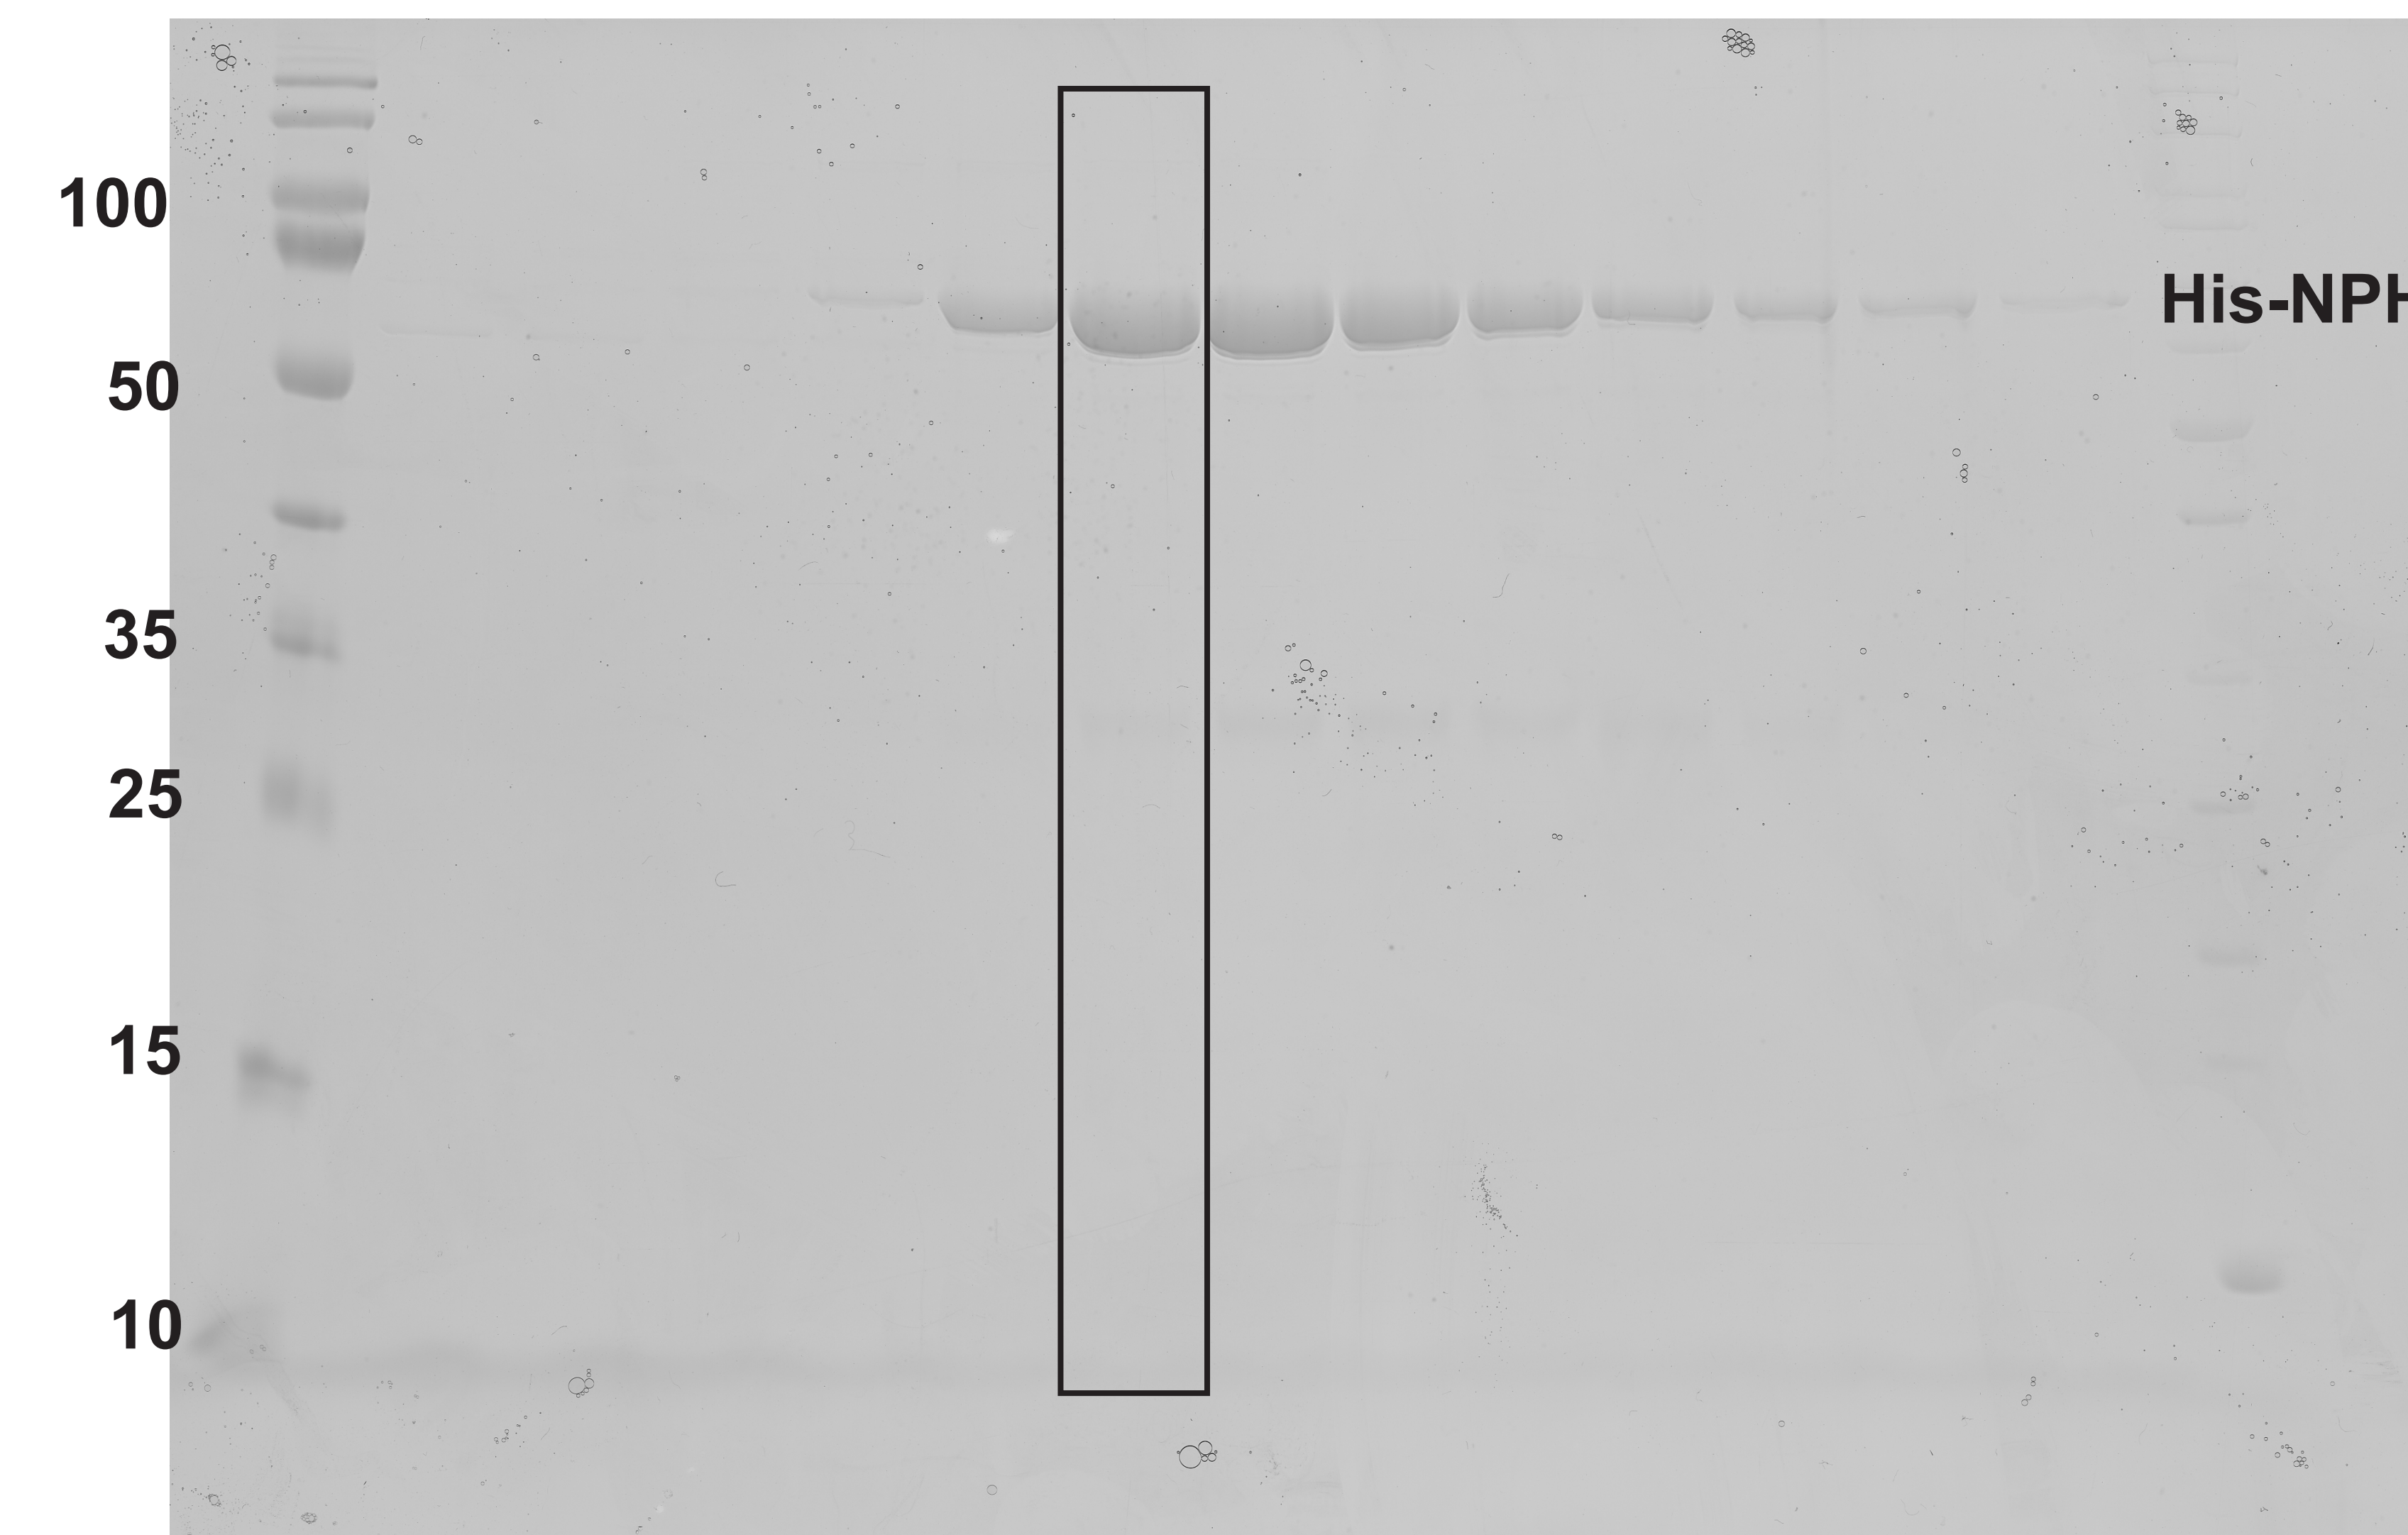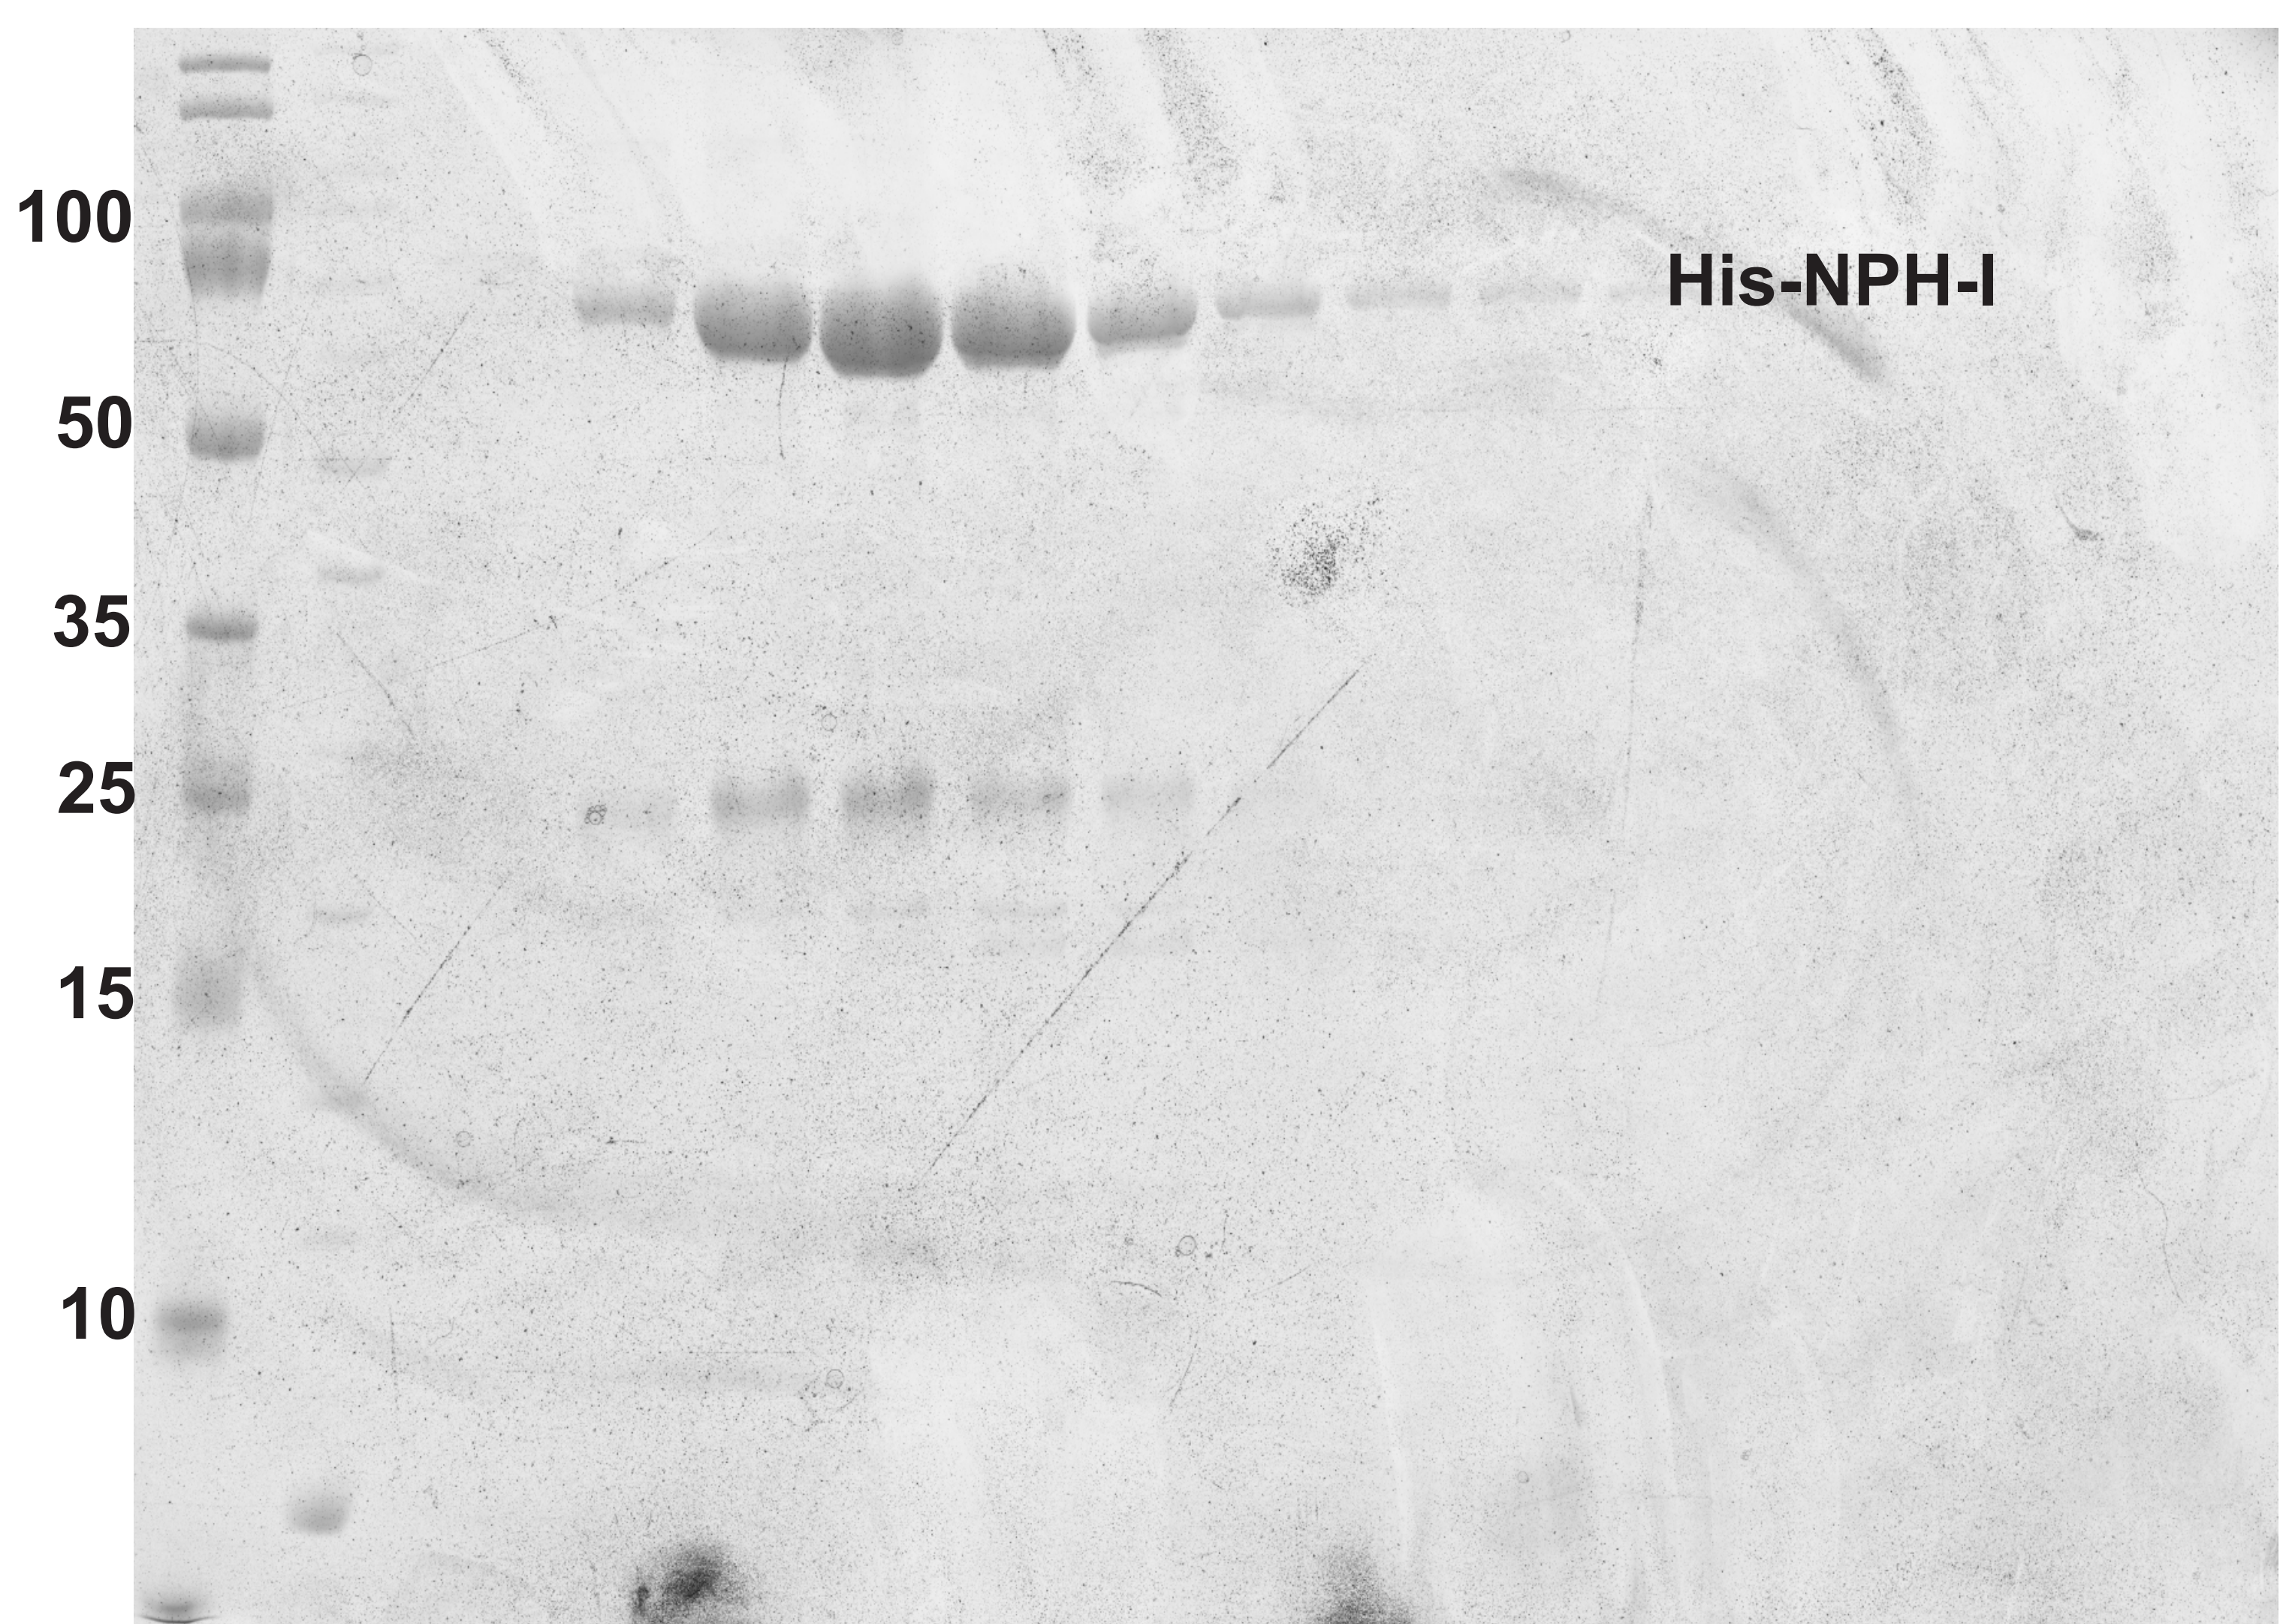

## GST-γ-Toxin E.coli Expression (Superdex 200)

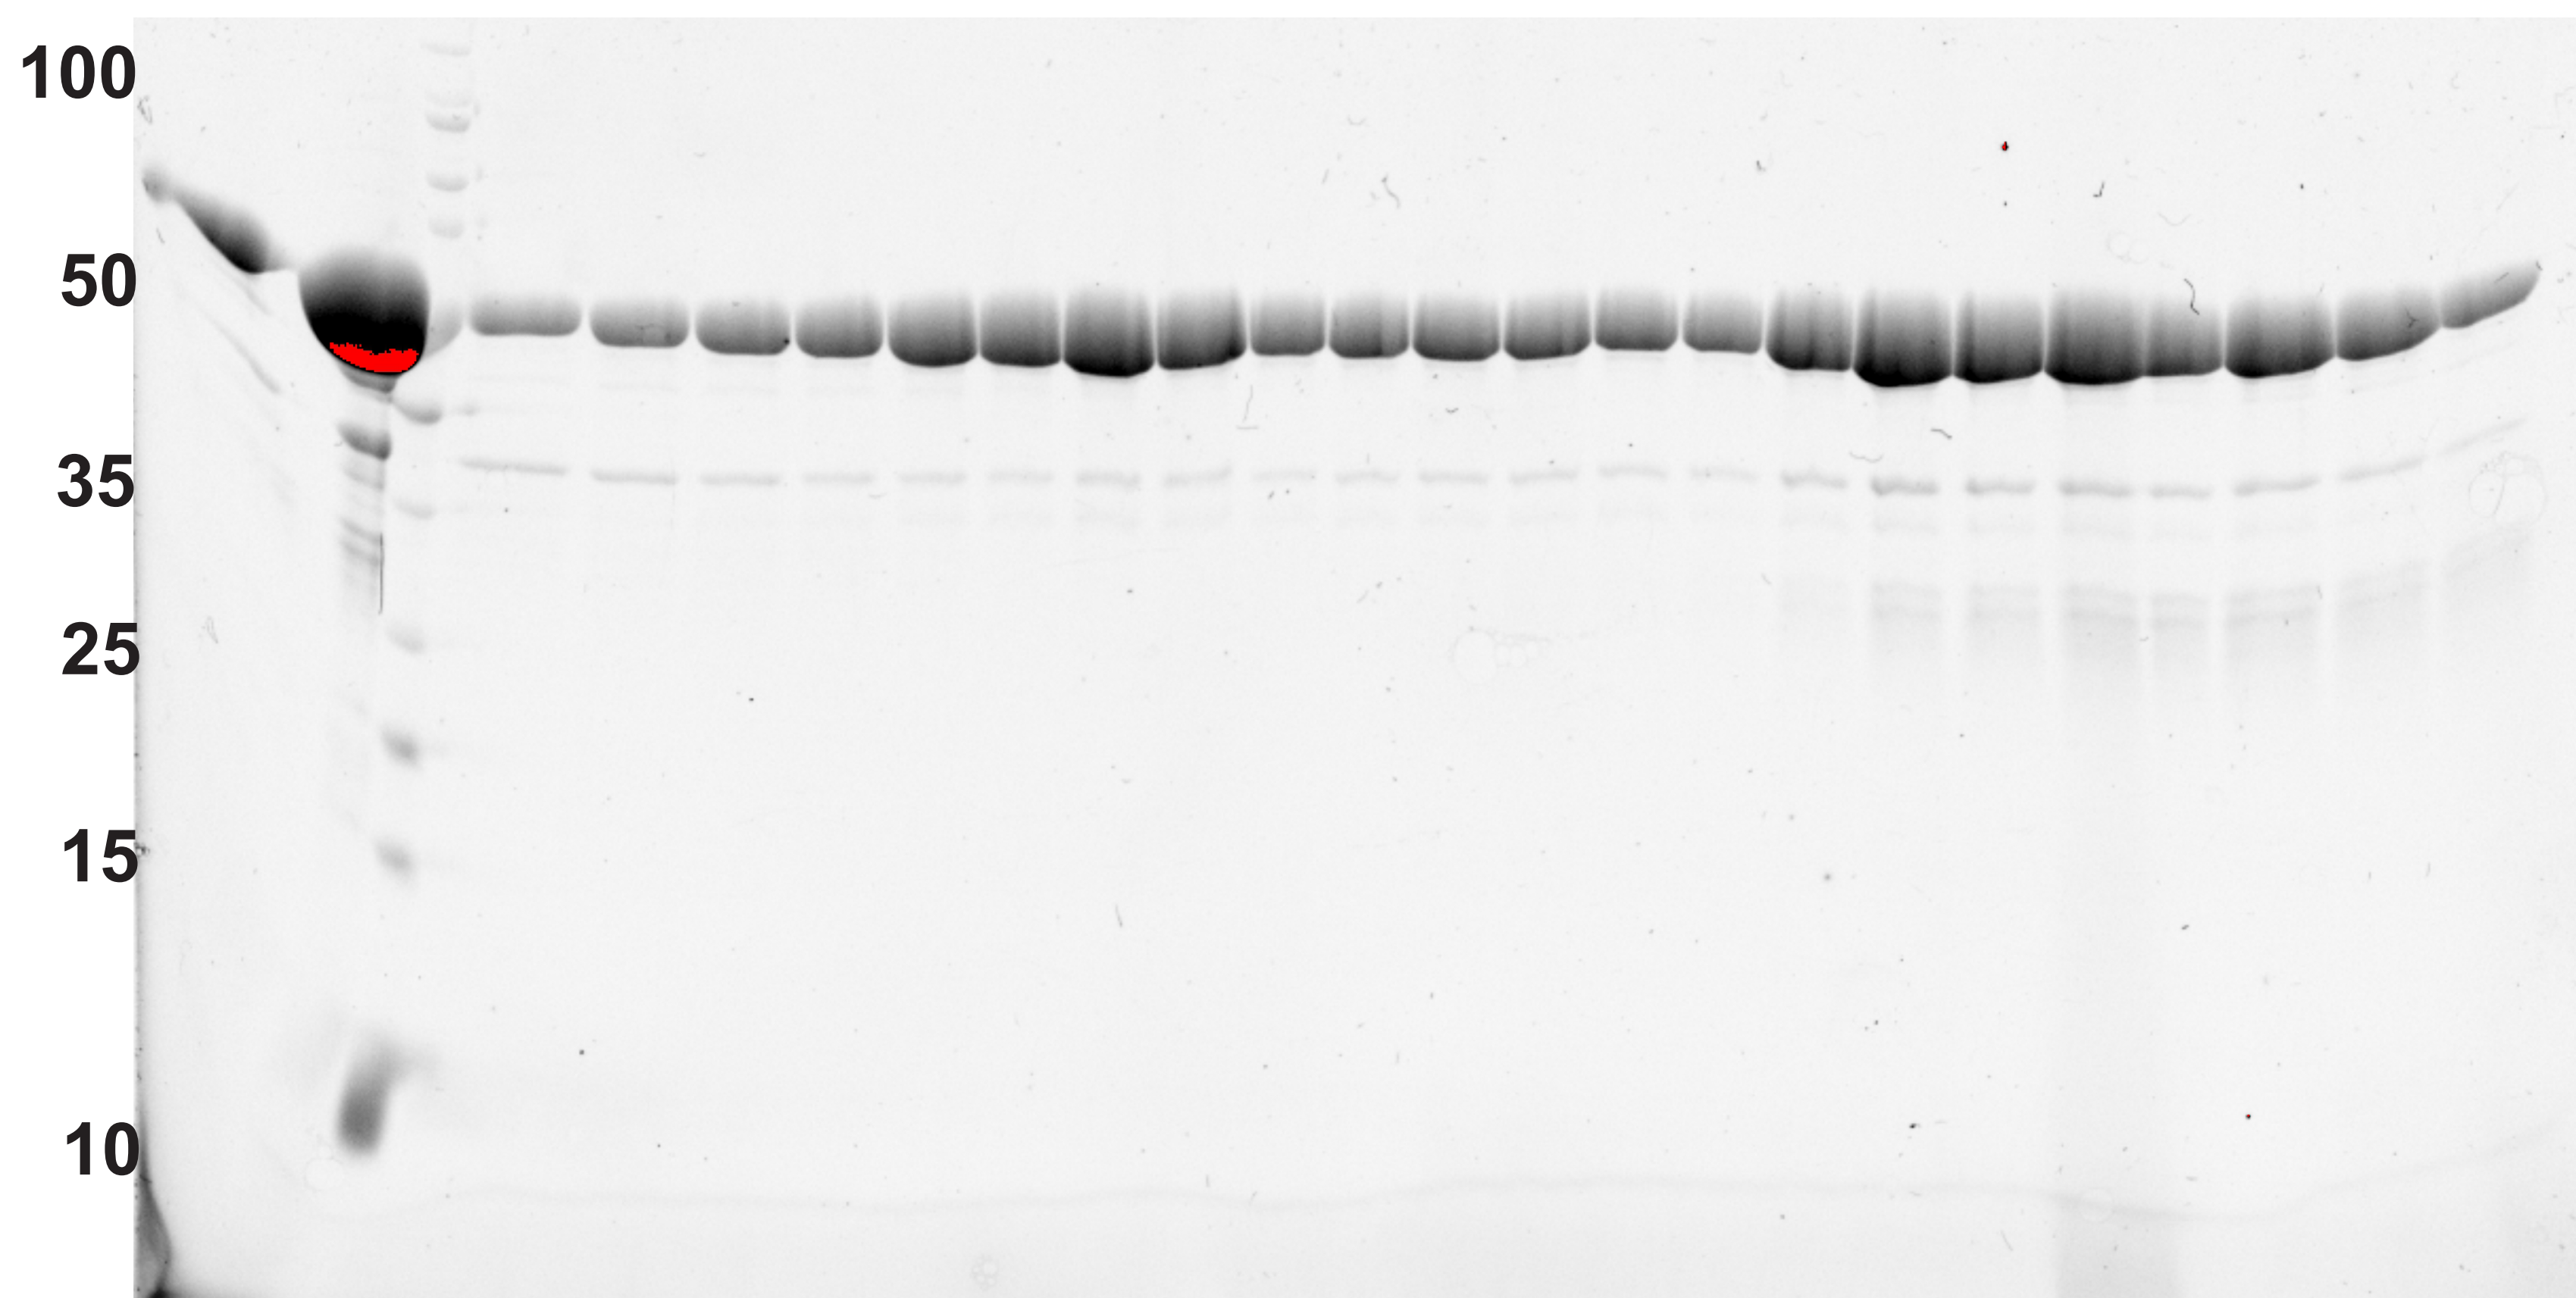

GST-γ-Toxin



Extended Data Fig.1B

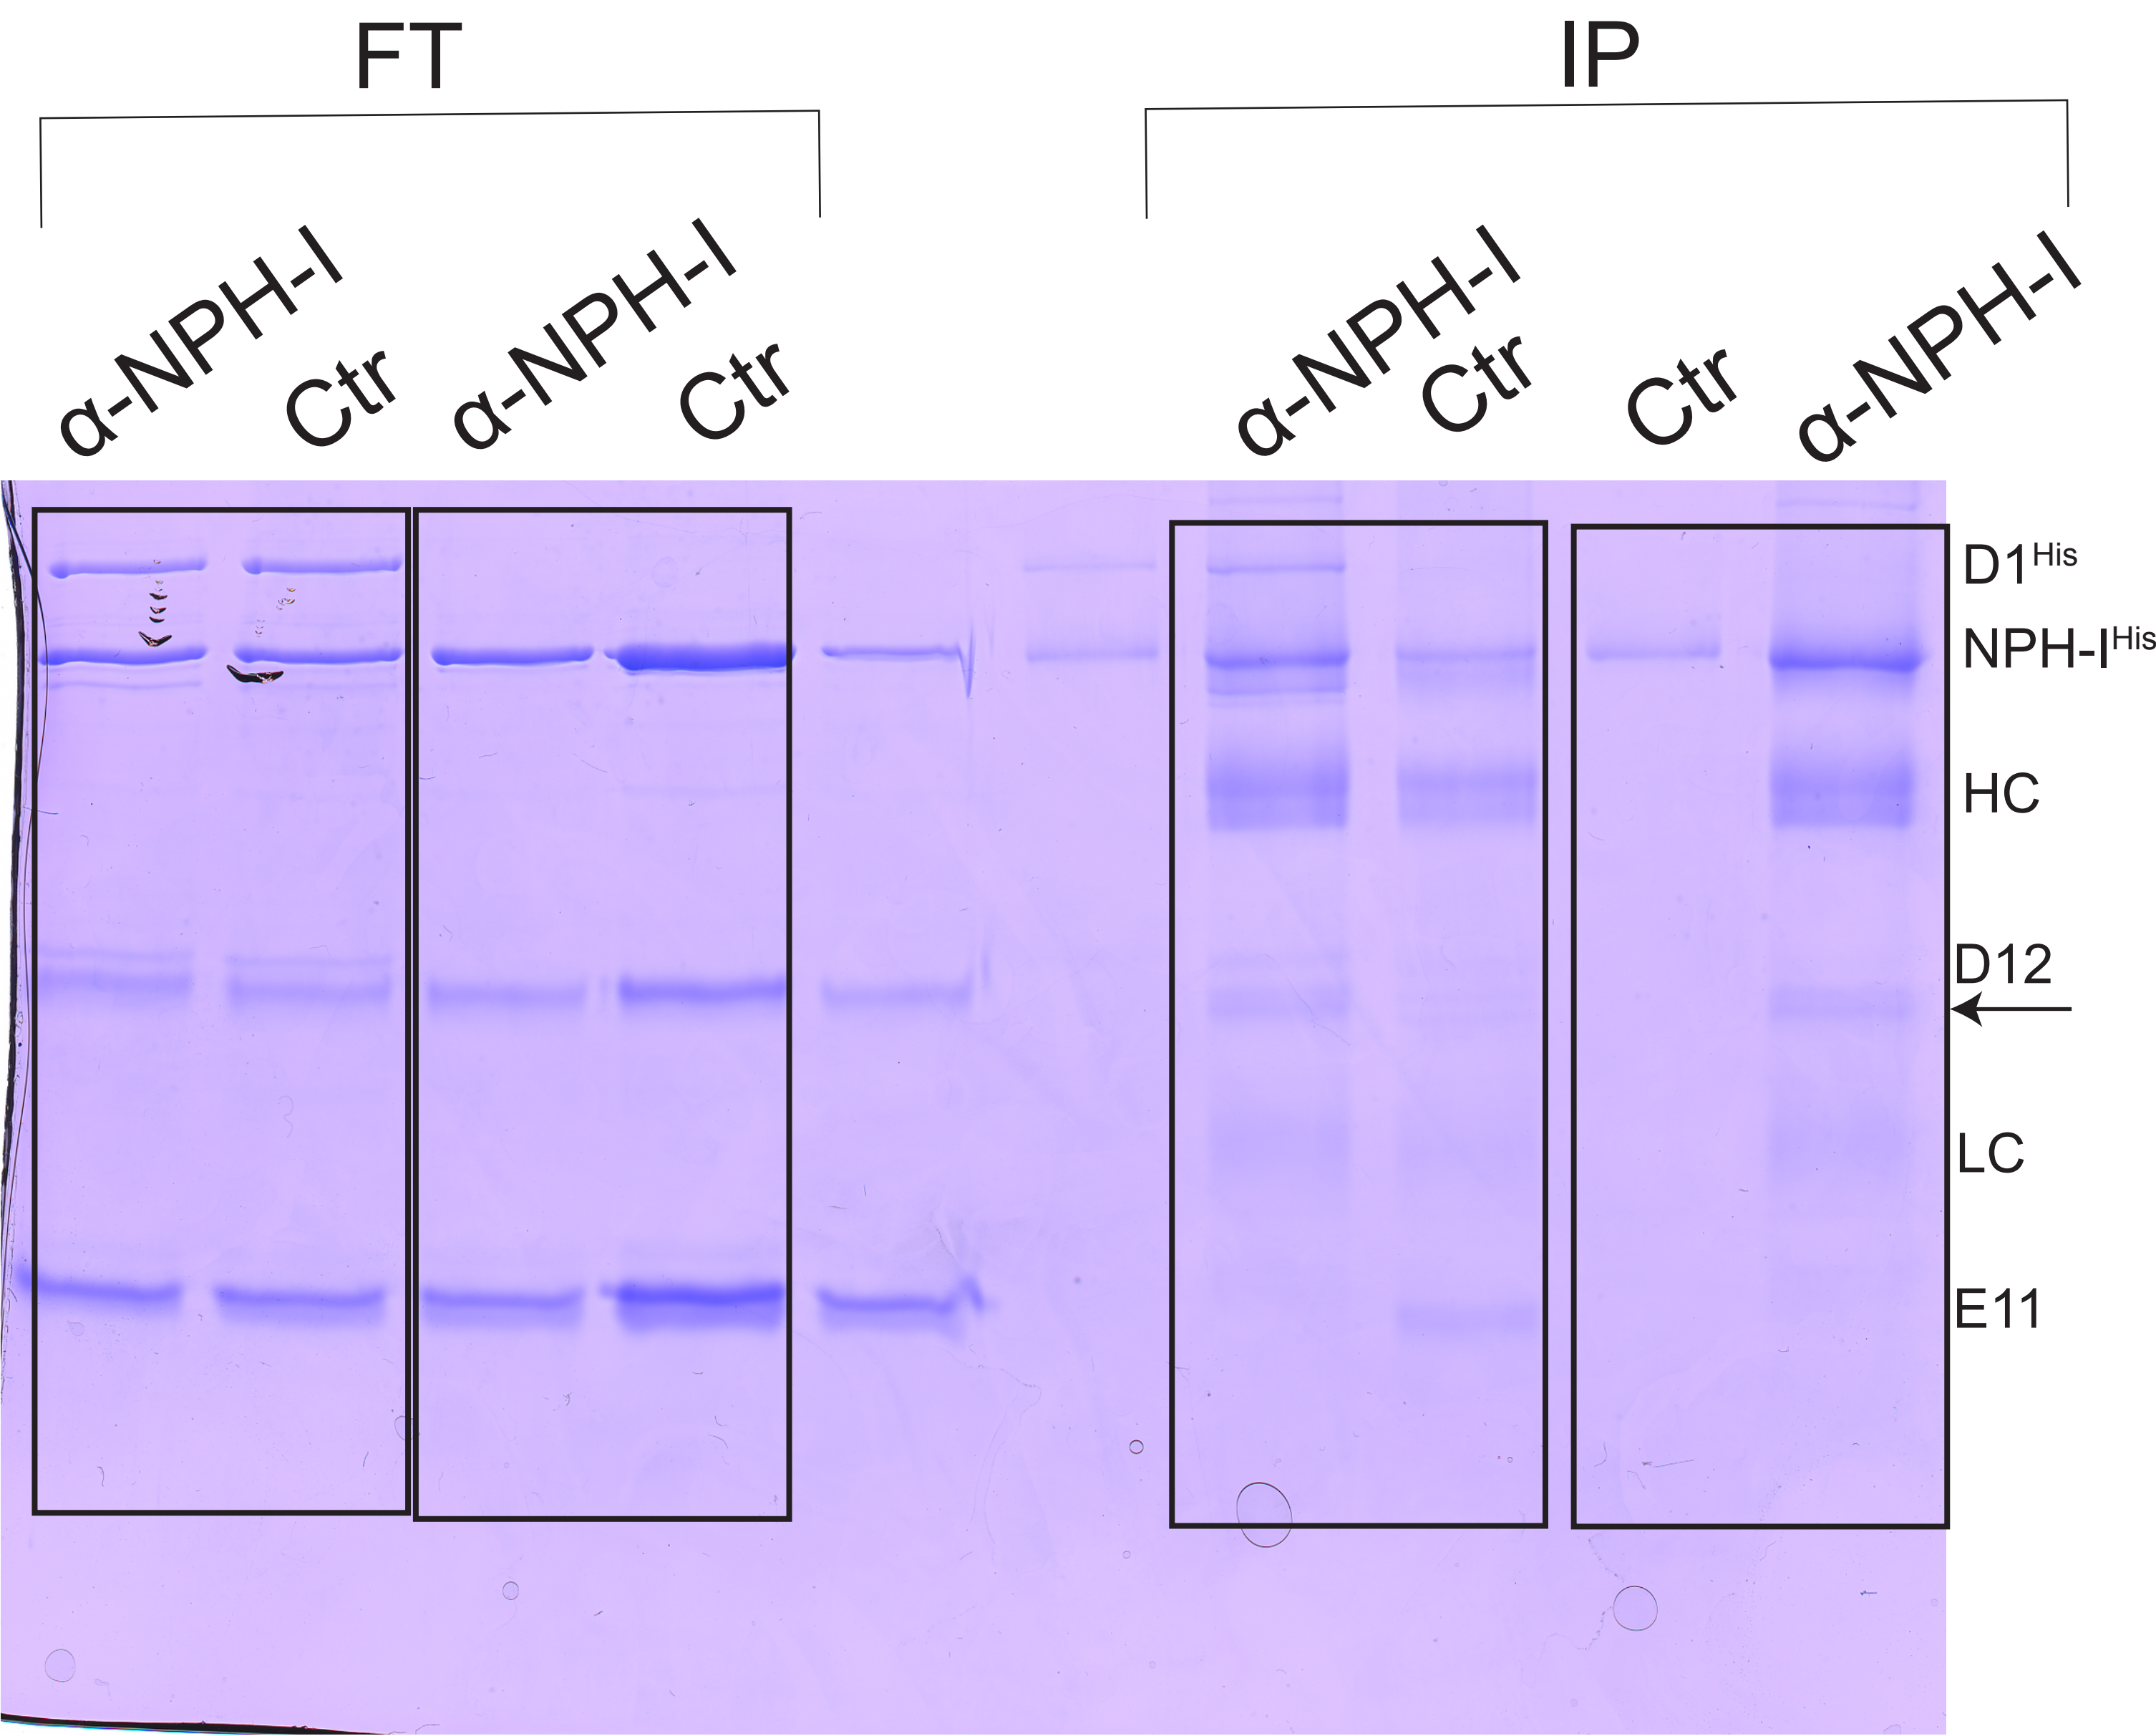



Extended Data Fig.1C

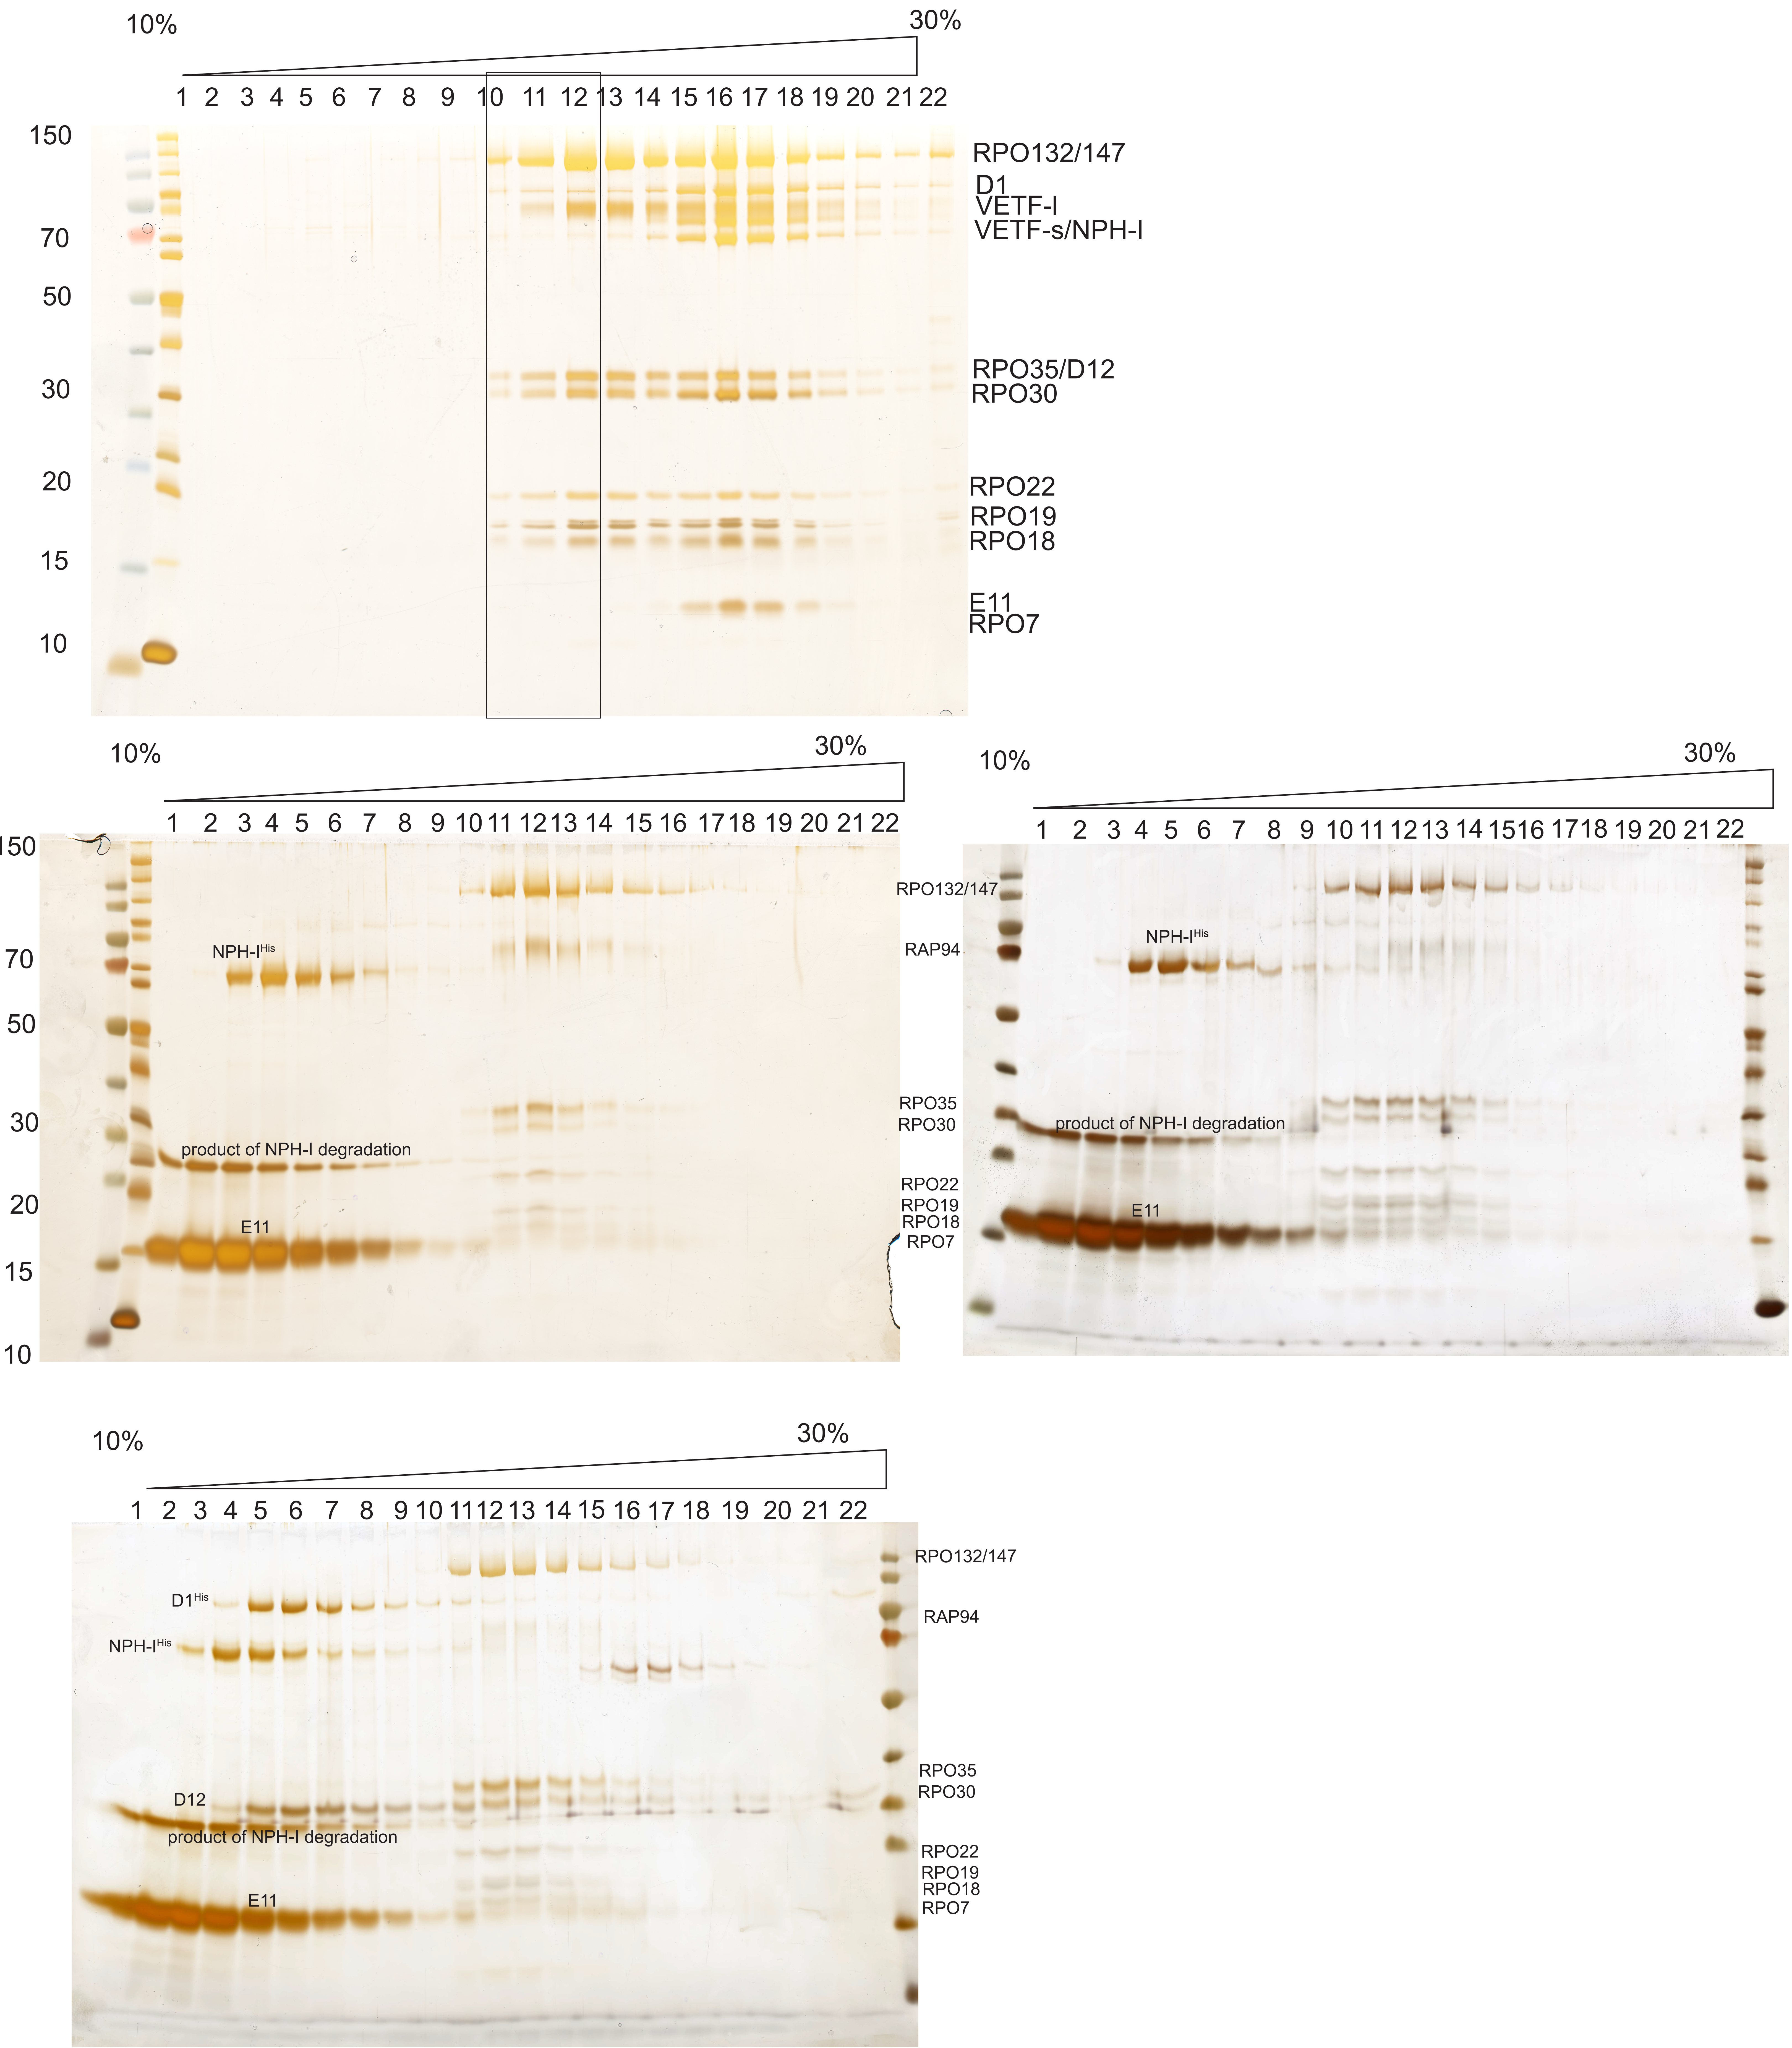

Supplement: MOESM11 [file 41594_2025_1653_MOESM11_ESM.pdf › 41594_2025_1653_MOESM11_ESM.pdf]
