# Supplementary material for: tRNA as an assembly chaperone for a macromolecular transcription-processing complex
Source: Springer Nature journal article supplement (doi:10.1038/s41594-025-01653-y), 2025-09-04

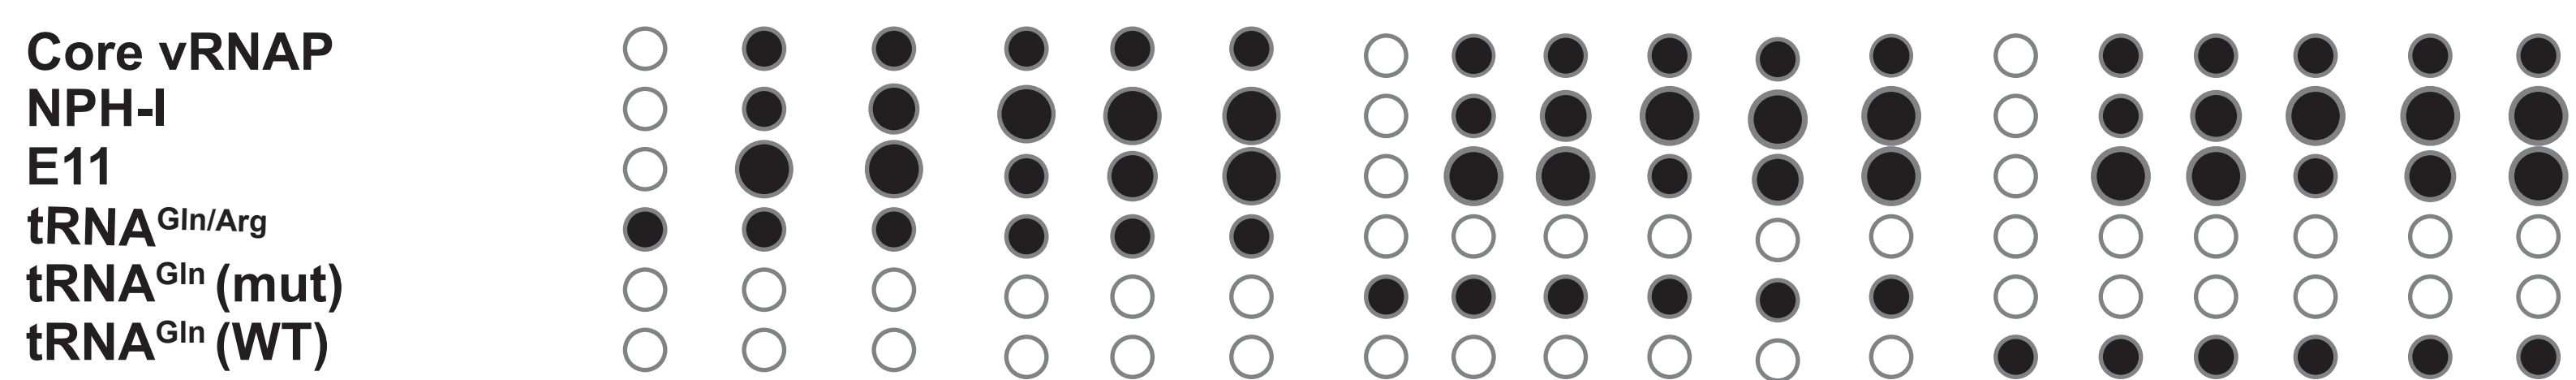

Titration of NPH-I/E11  
on CE

① - tRNA  
② CE / 1:100 NPH-I / 1:10 E11 / CE tRNA  
③ CE / 1:10 NPH-I / 1:10 E11 / CE tRNA  
④ CE / 1:10 NPH-I / 1:10 E11 / CE tRNA  
⑤ CE / 1:10 NPH-I / 1:10 E11 / CE tRNA  
⑥ CE / 1:10 NPH-I / 1:10 E11 / CE tRNA  
7... 12 the same but with 1033 (TF)  
13... 18 the same but with WT Gln (TF)

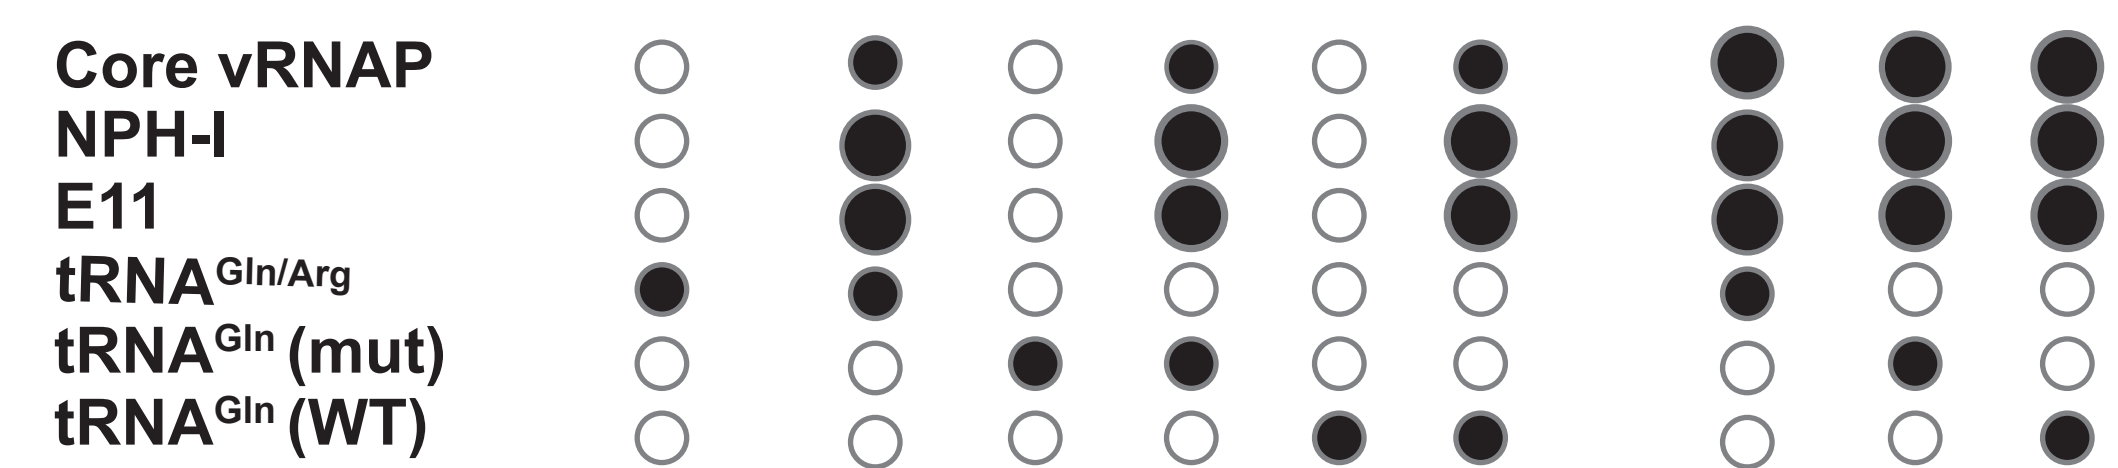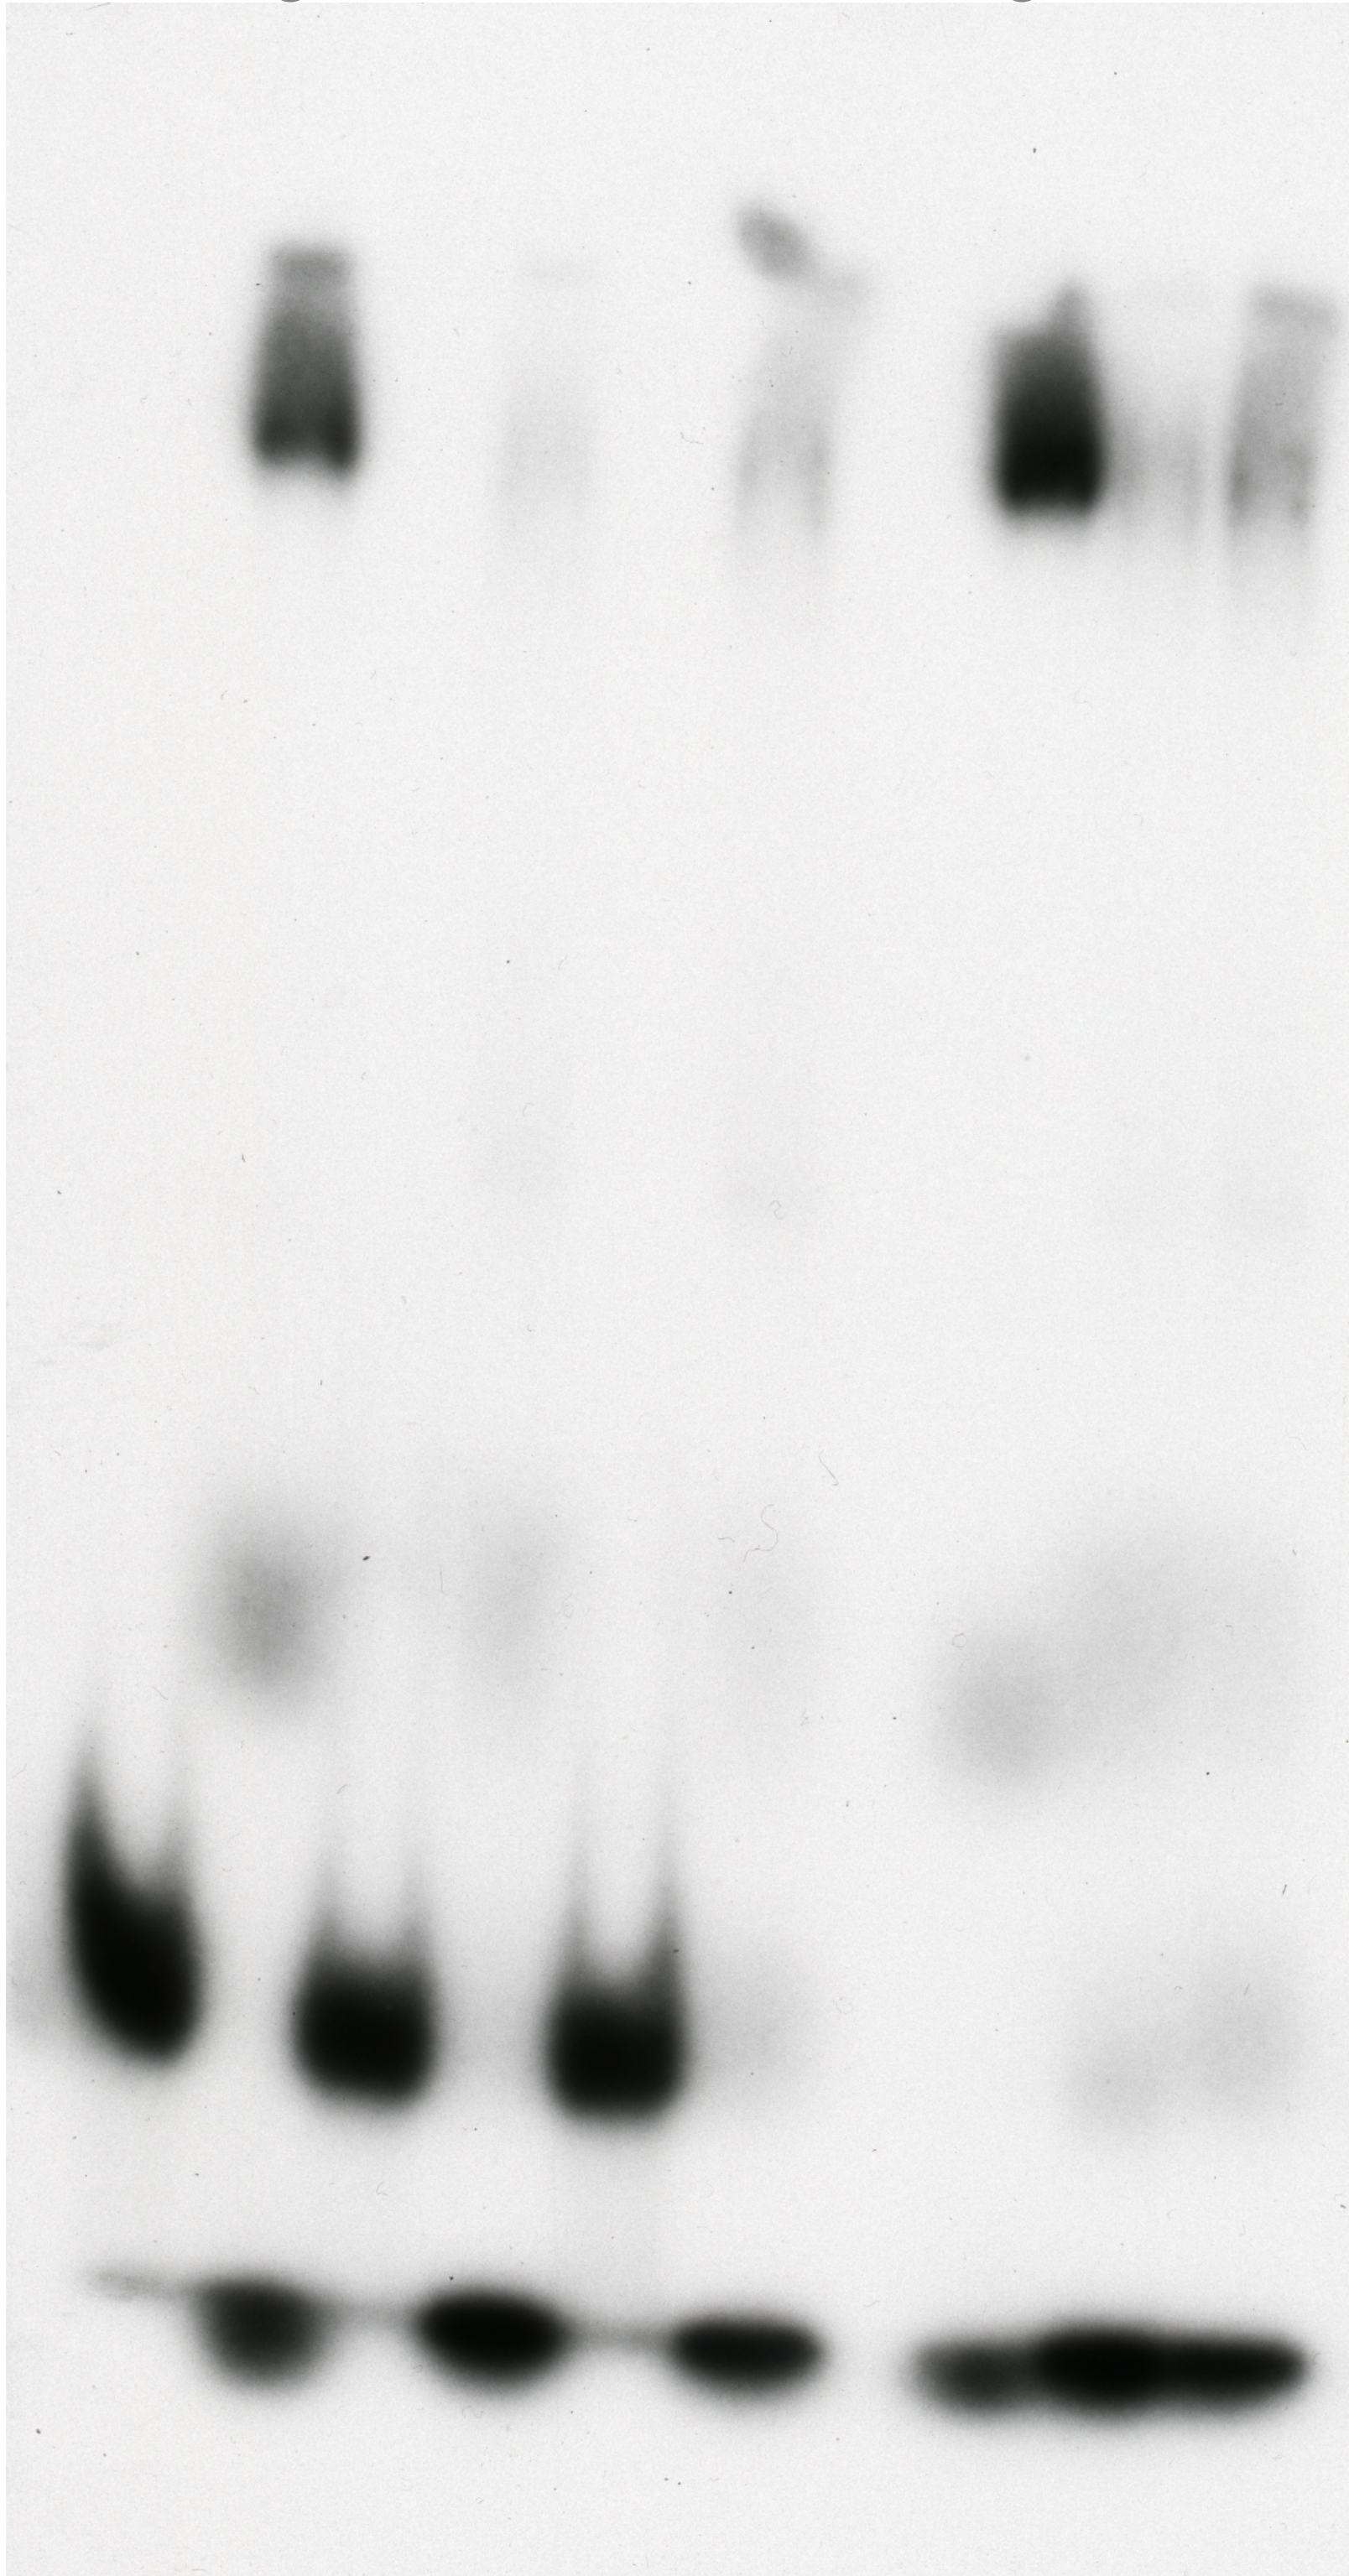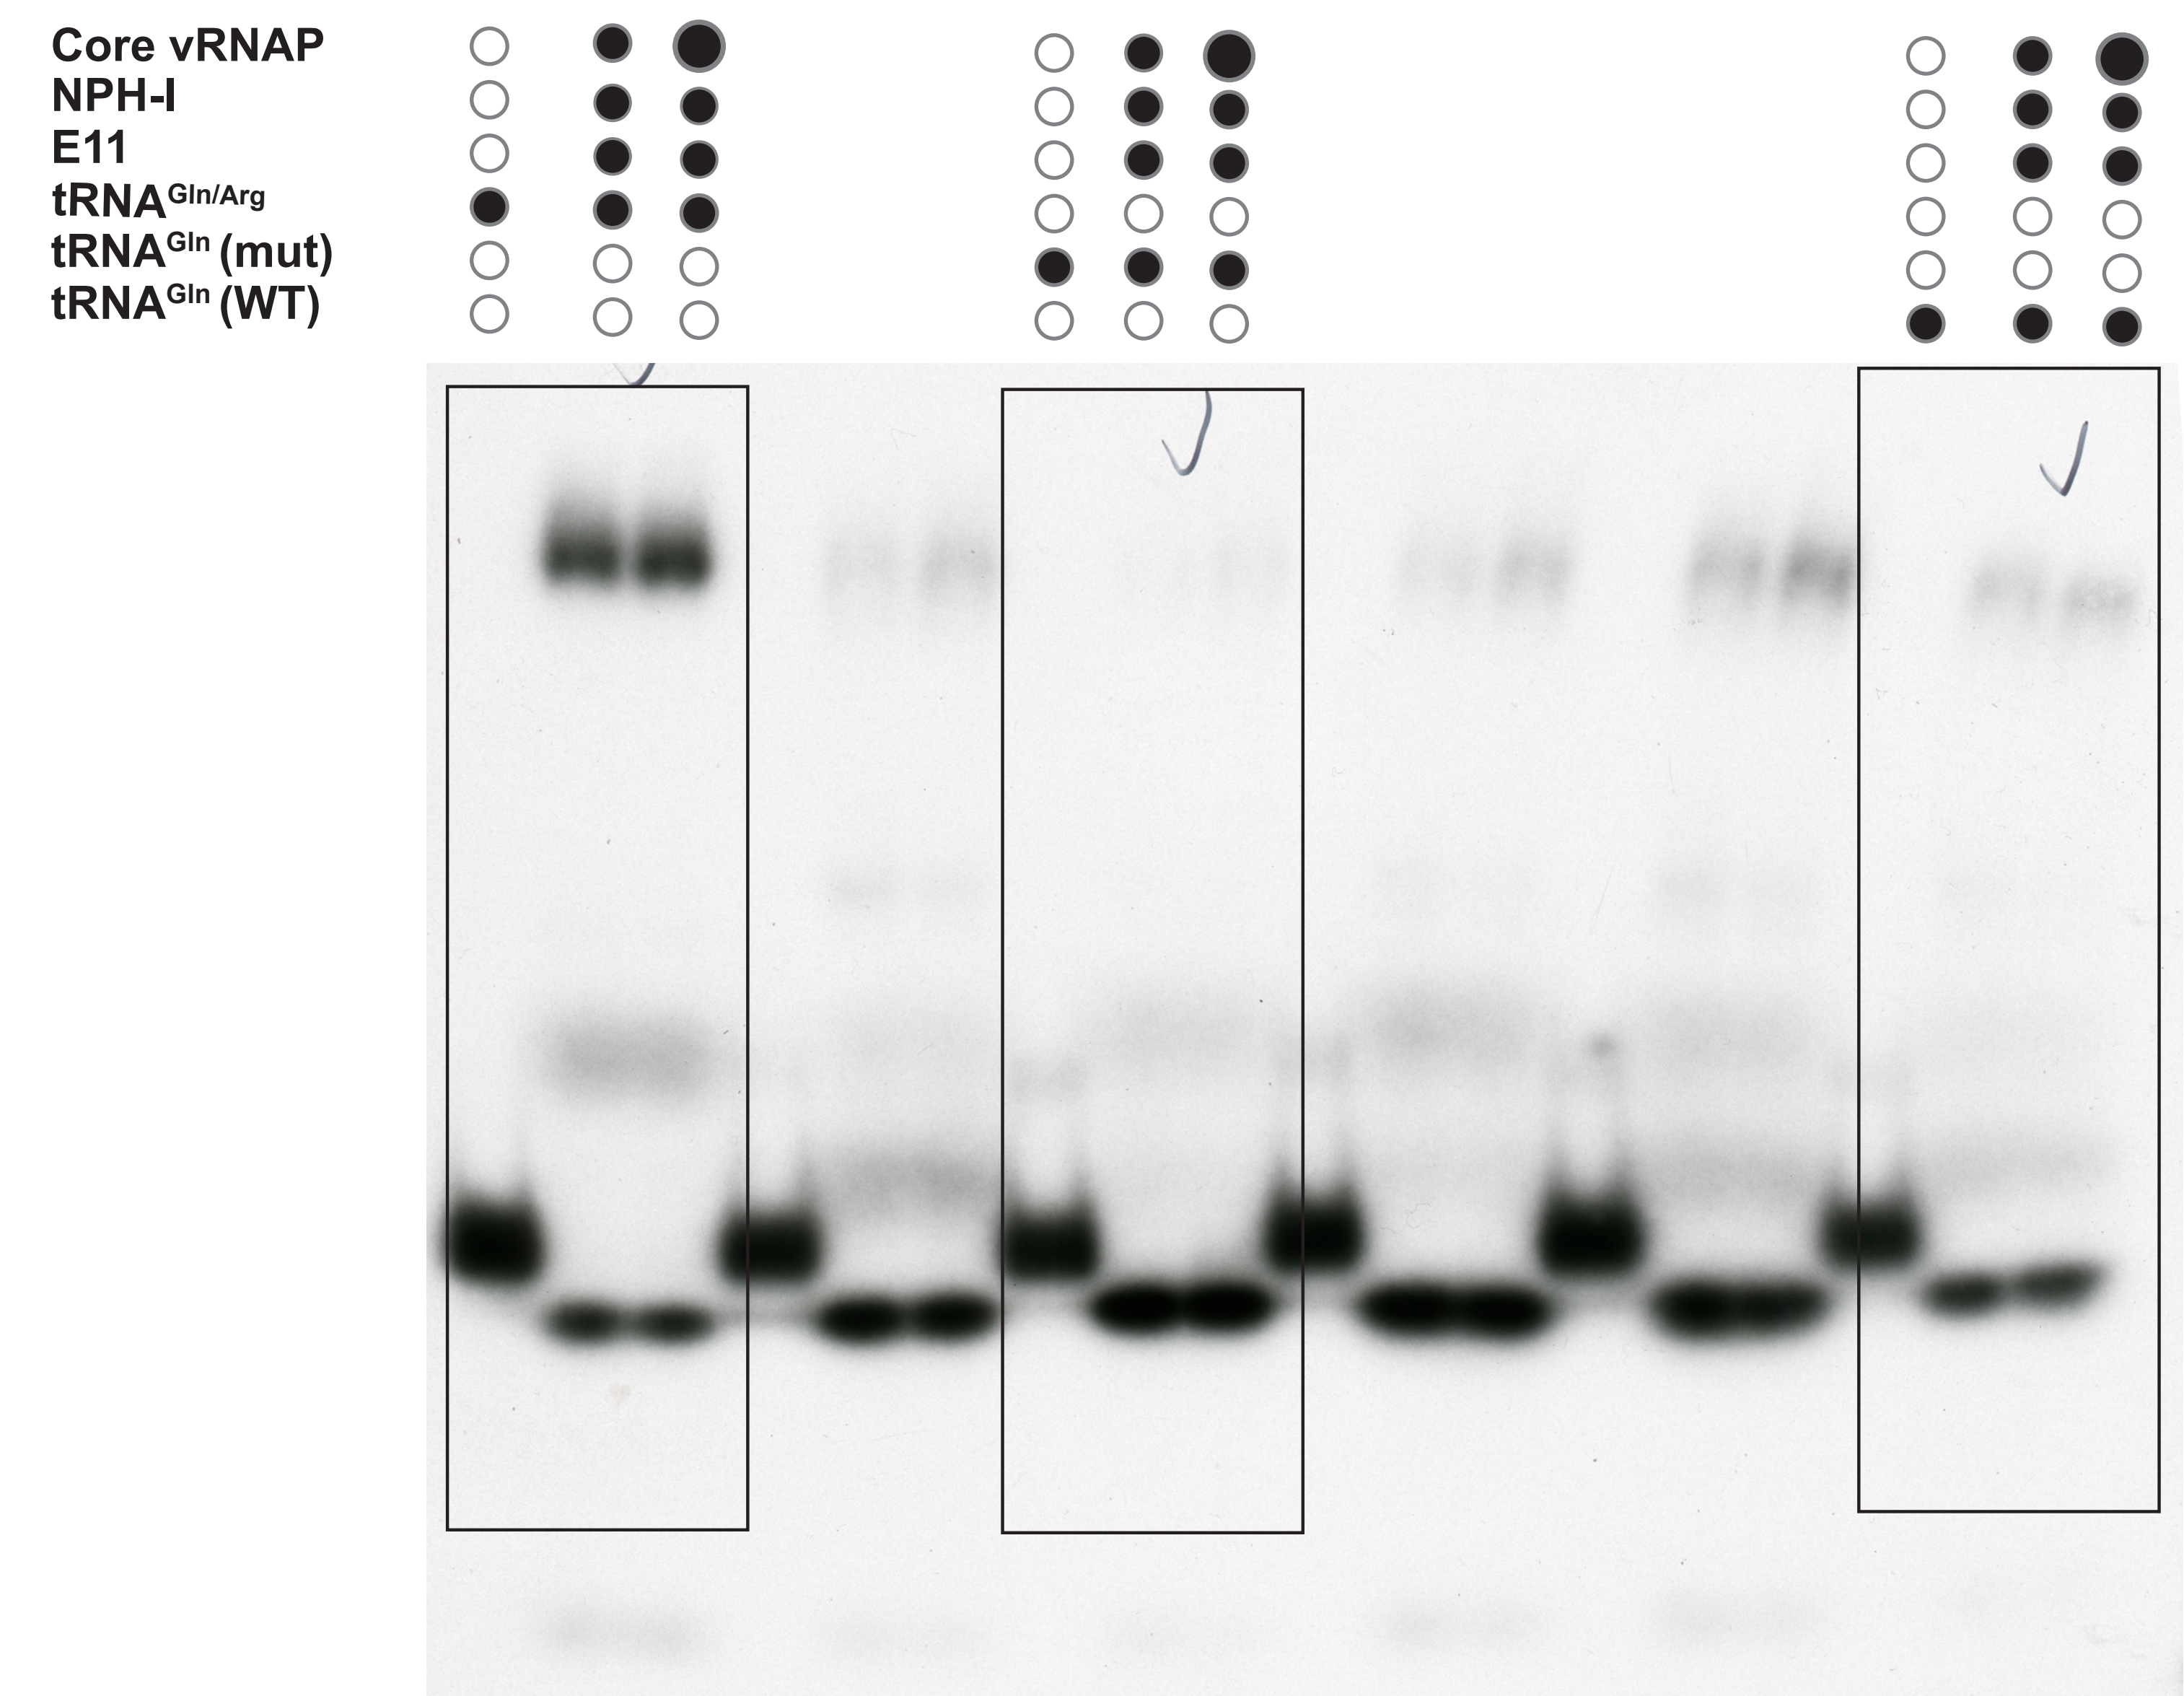

Supplement: MOESM12 [file 41594_2025_1653_MOESM12_ESM.pdf › 41594_2025_1653_MOESM12_ESM.pdf]
