# Supplementary material for: tRNA as an assembly chaperone for a macromolecular transcription-processing complex
Source: Springer Nature journal article supplement (doi:10.1038/s41594-025-01653-y), 2025-09-04

# Extended Data Fig.9

NB analysis; estimation amout of tRNA<sup>Gln</sup>(TTG) in virion/complete vRNAP

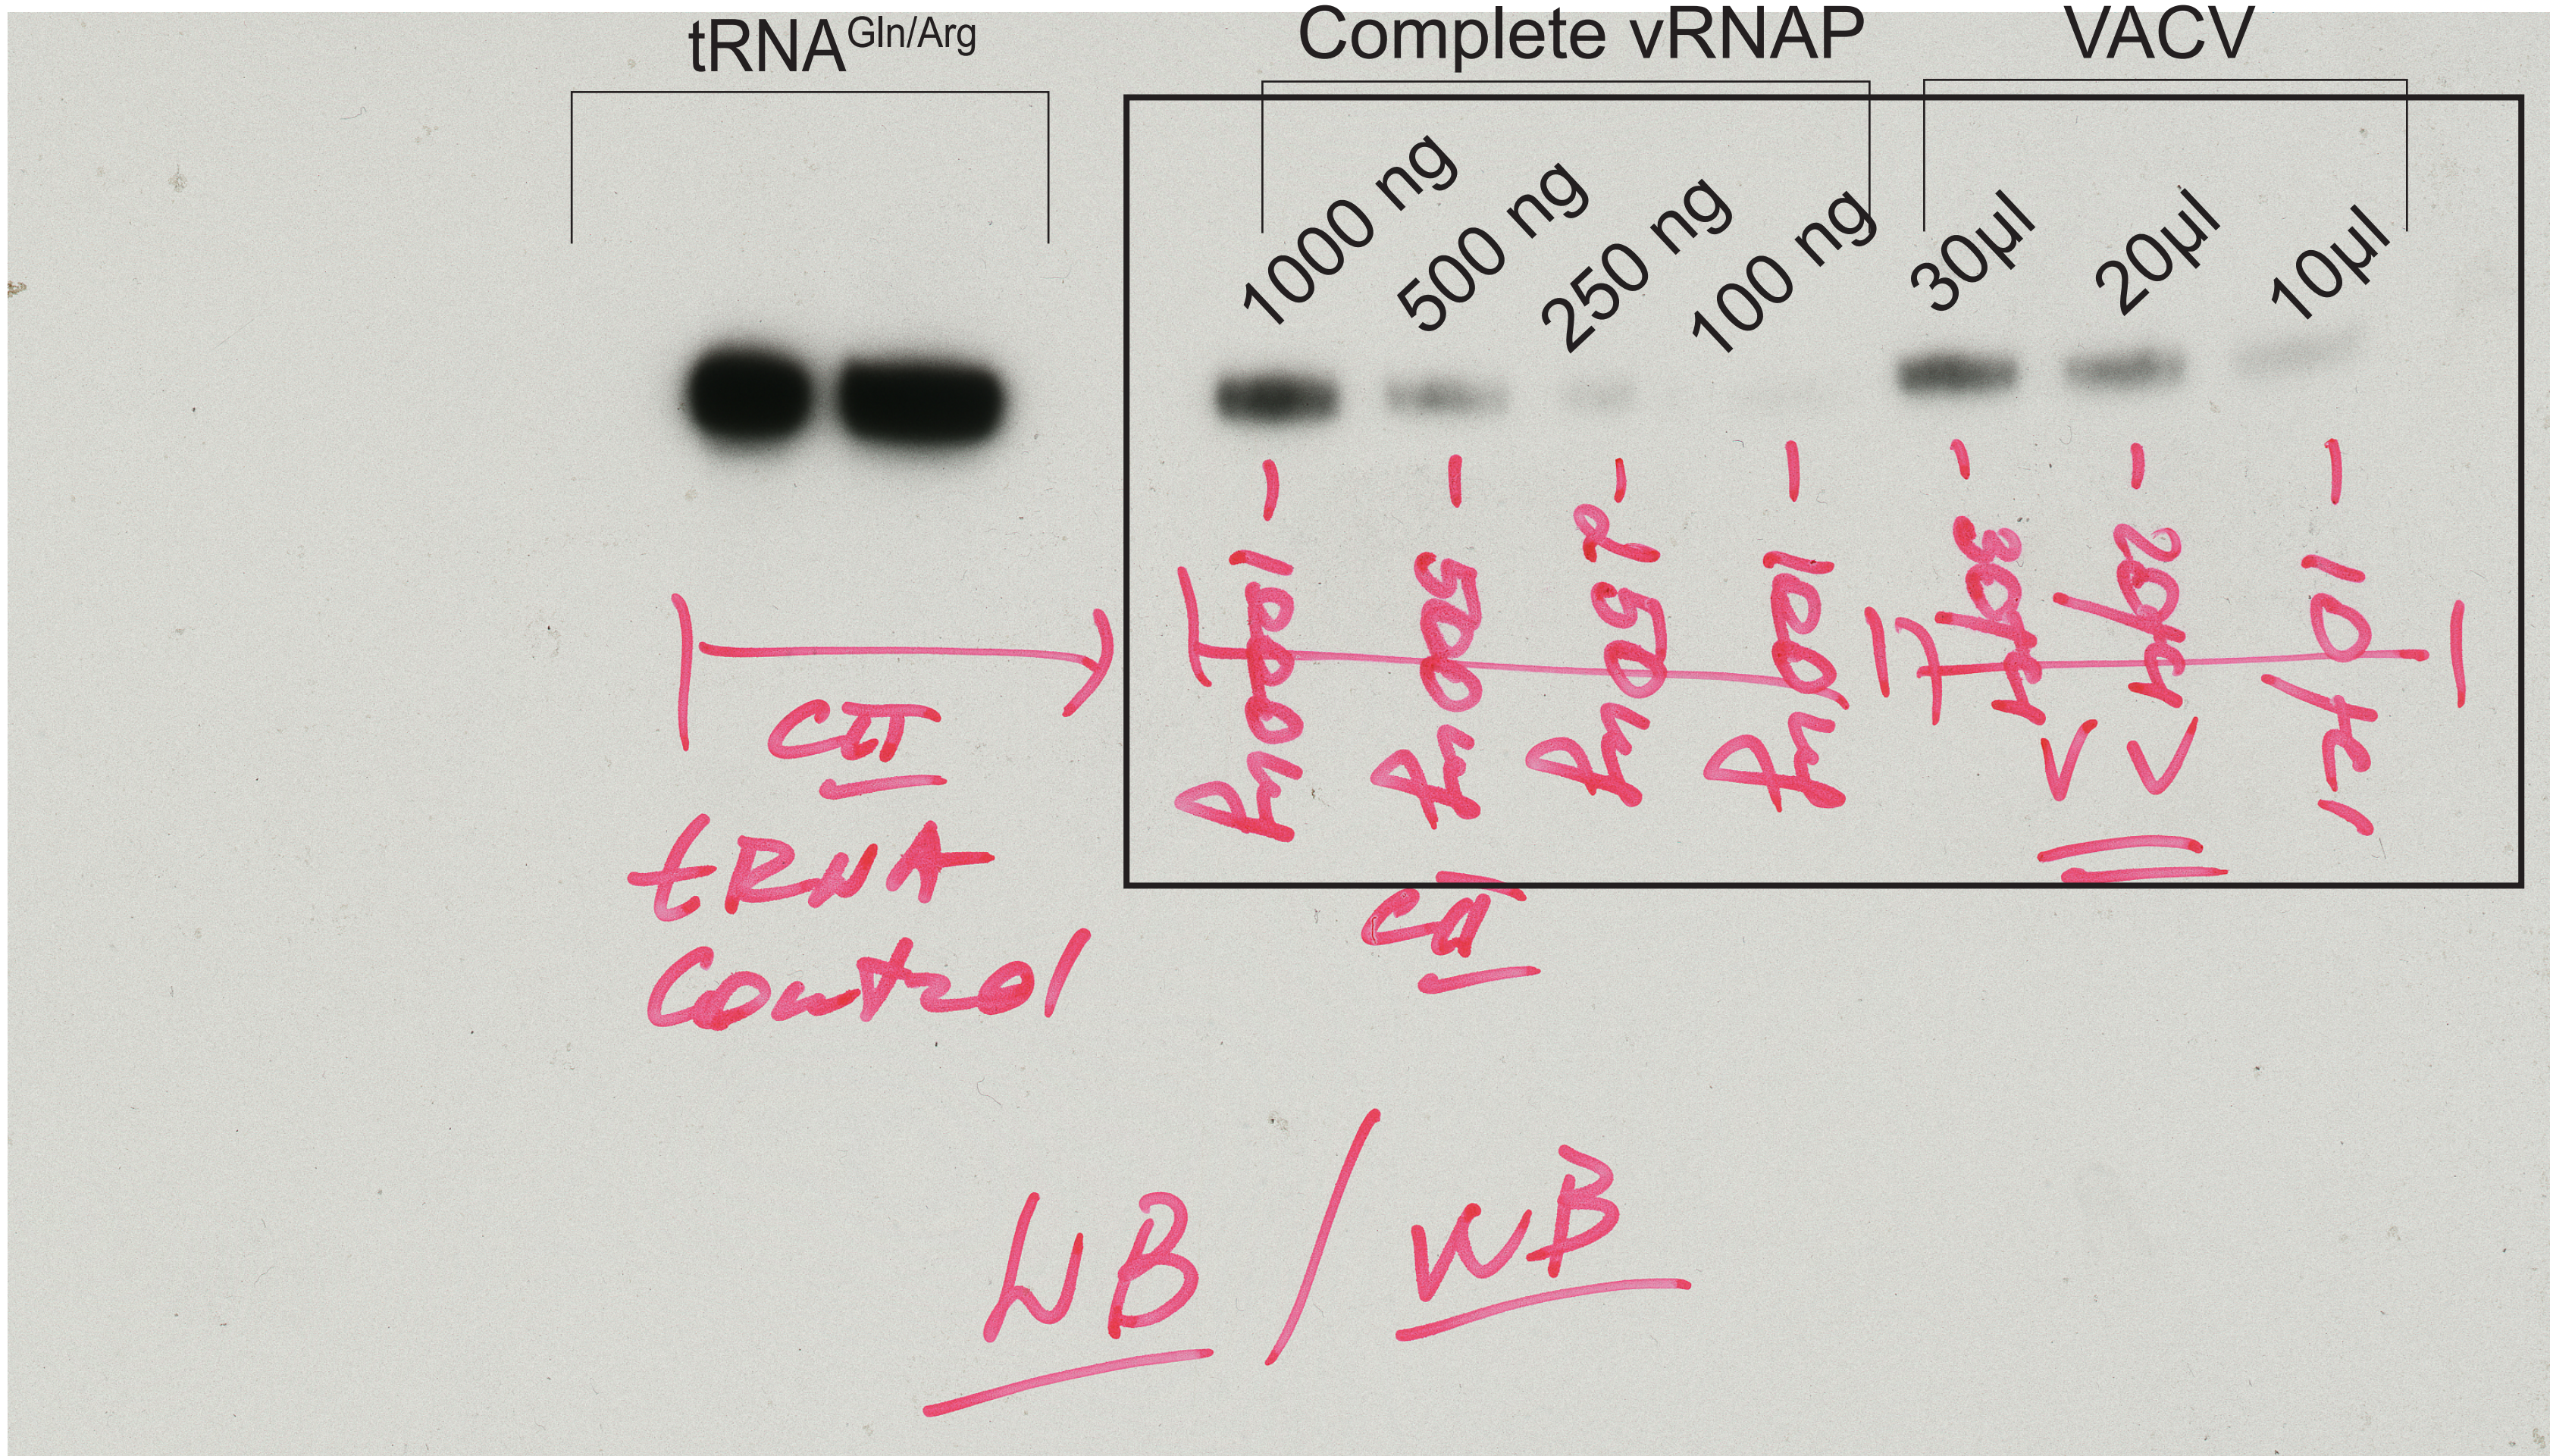

Anti-HA-RPO132

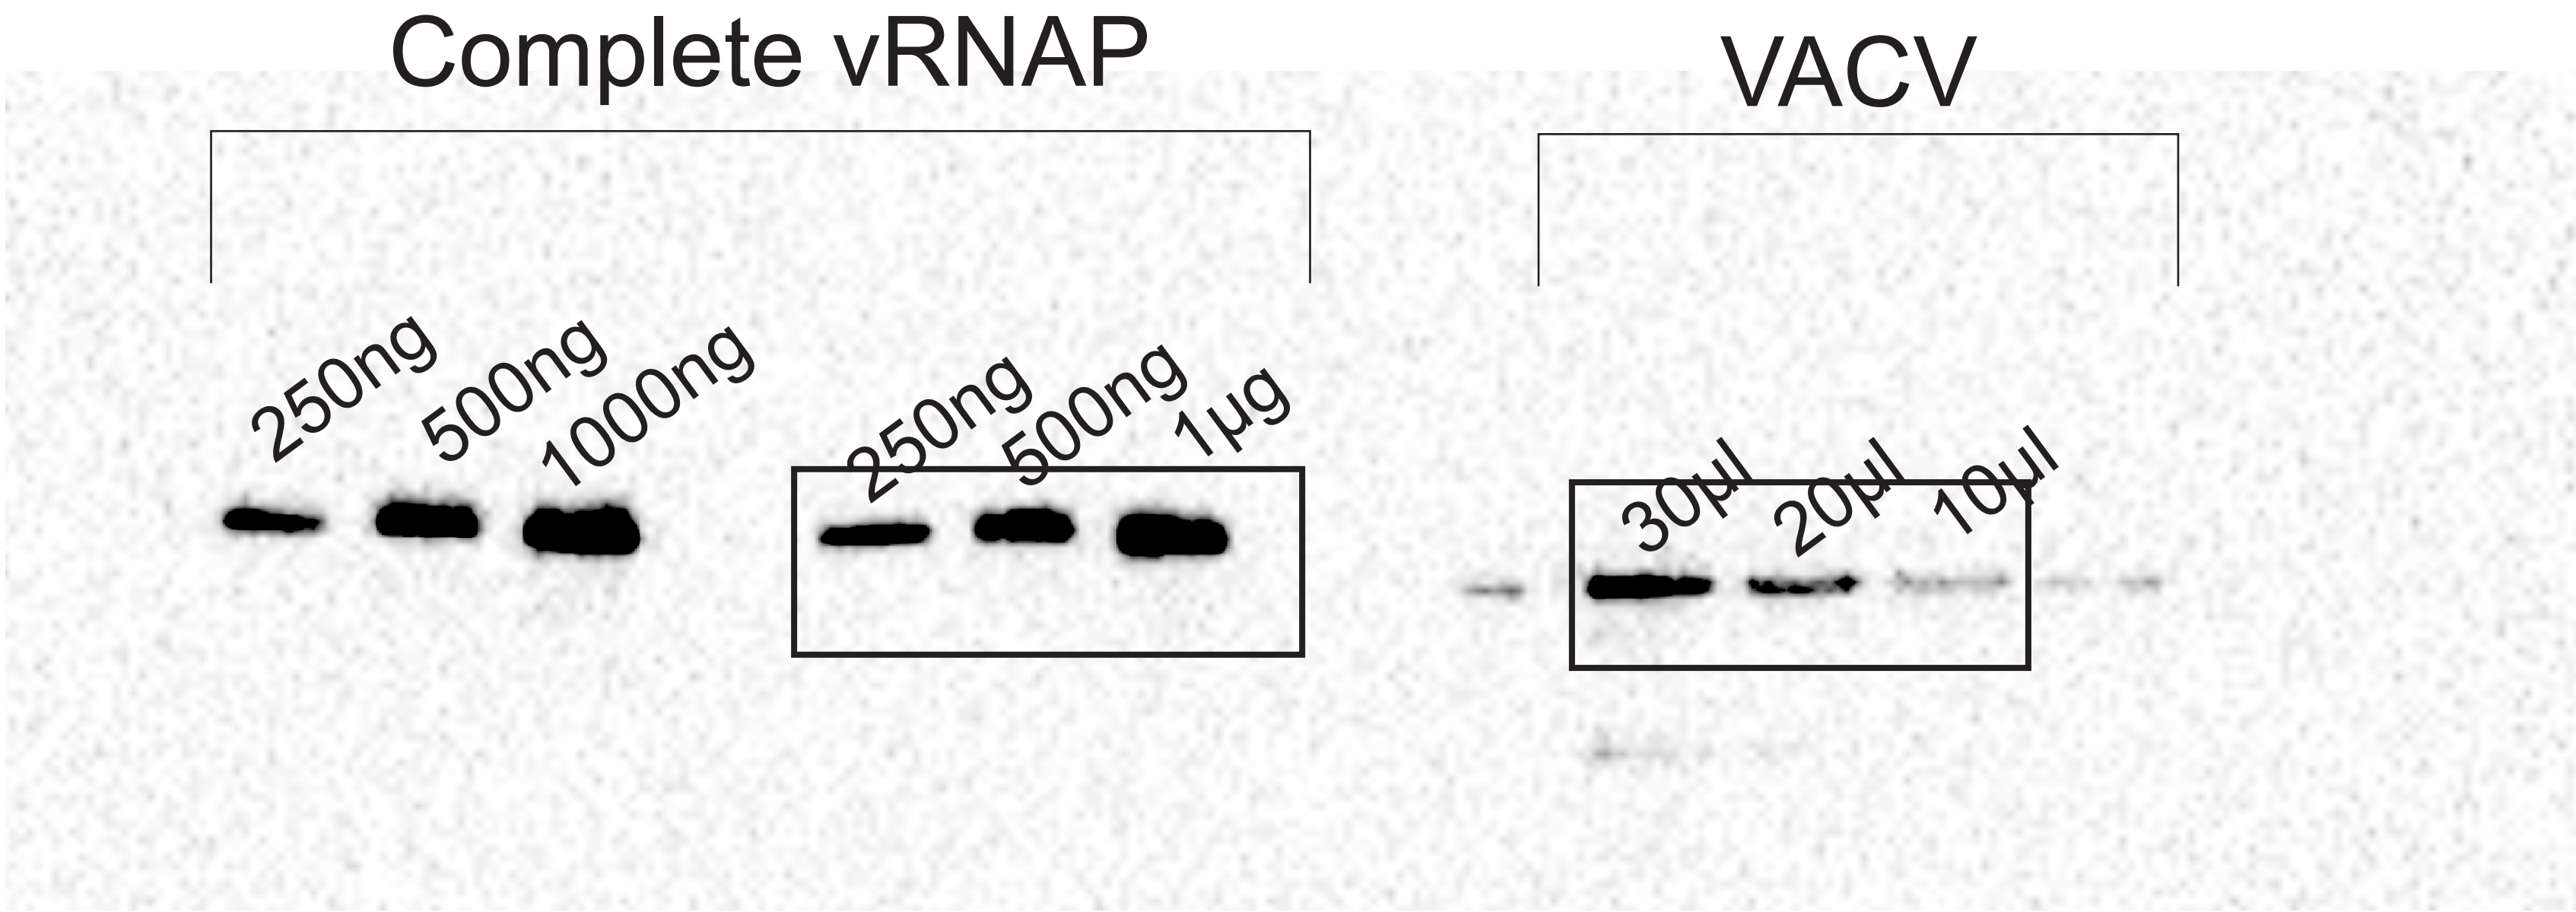

Supplement: MOESM14 [file 41594_2025_1653_MOESM14_ESM.pdf › 41594_2025_1653_MOESM14_ESM.pdf]
