# Supplementary material for: tRNA as an assembly chaperone for a macromolecular transcription-processing complex
Source: Nat Struct Mol Biol. 2025 Sep 4;32(11):2349–58. doi: 10.1038/s41594-025-01653-y (PMC12618233; doi:10.1038/s41594-025-01653-y)
Supplement: Supplementary file 4 — Supplementary Table 2. Top 20 tRNA sequencing reads. [file 41594_2025_1653_MOESM4_ESM.xlsx]

## Sheet: Tabelle1
	Length	vvt RNA		Gene name	Length	tRNA cII		Gene name	length
tRNA-Gln-TTG-2-1	73	67177		tRNA-Gln-TTG-2-1	73	1279882		tRNA-Gln-TTG-2-1	73	912156
tRNA-Gly-GCC-1-5	72	45935		tRNA-Arg-ACG-2-1	74	598016		tRNA-Gln-CTG-1-4	73	147442
tRNA-Arg-ACG-2-1	74	38076		tRNA-Gln-TTG-1-1	73	426044		tRNA-Arg-TCG-1-1	74	134066
tRNA-Arg-ACG-1-3	74	23541		tRNA-Arg-ACG-1-3	74	231525		tRNA-Arg-ACG-2-1	74	62214
tRNA-Gln-TTG-1-1	73	20026		tRNA-Gln-TTG-3-2	73	204003		tRNA-Gln-TTG-3-2	73	41215
tRNA-Gly-GCC-2-3	72	16205		tRNA-Gln-CTG-1-4	73	182375		tRNA-Arg-ACG-1-3	74	39962
tRNA-Gln-CTG-1-4	73	14382		tRNA-Arg-ACG-1-1	74	144080		tRNA-Gln-TTG-1-1	73	37309
tRNA-Arg-TCG-3-1	74	13633		tRNA-Arg-TCG-1-1	74	130723		tRNA-Gln-CTG-2-1	73	36097
tRNA-Gln-TTG-3-2	73	13066		tRNA-Arg-TCG-3-1	74	88206		tRNA-Gln-CTG-6-1	73	28115
tRNA-Gly-GCC-2-6	72	12926		tRNA-Gln-CTG-2-1	73	77548		tRNA-Gln-TTG-3-3	73	18099
tRNA-His-GTG-1-2	73	12325		tRNA-Gln-CTG-6-1	73	54013		tRNA-Gln-TTG-3-1	73	16060
tRNA-Arg-TCG-1-1	74	12021		tRNA-Gln-CTG-4-1	73	29896		tRNA-Gln-CTG-1-3	73	11273
tRNA-Arg-ACG-1-1	74	11063		tRNA-Gln-CTG-4-2	73	25163		tRNA-Gln-CTG-1-1	73	10979
tRNA-Asp-GTC-2-6	73	10369		tRNA-Gln-CTG-1-1	73	22817		tRNA-Gln-CTG-4-2	73	9938
tRNA-Asp-GTC-2-8	73	9744		tRNA-Arg-TCG-2-1	74	22661		tRNA-Gln-CTG-1-2	73	9147
tRNA-Asp-GTC-2-7	73	9433		tRNA-Gln-CTG-1-3	73	19083		tRNA-Gln-CTG-1-5	73	7850
tRNA-Gly-CCC-2-2	72	8605		tRNA-Gln-TTG-3-3	73	18206		tRNA-Gln-TTG-4-1	73	7168
tRNA-Glu-TTC-2-1	73	8086		tRNA-Gln-TTG-3-1	73	16717		tRNA-Arg-TCG-2-1	74	6816
tRNA-Gly-TCC-2-6	73	7079		tRNA-Arg-CCG-1-1	74	12577		tRNA-Gln-CTG-5-1	73	5525
tRNA-iMet-CAT-1-4	73	5241		tRNA-Arg-CCG-1-2	74	12017		tRNA-Arg-TCG-4-1	74	3954
tRNA-Gln-CTG-6-1	73	5007		tRNA-Gln-CTG-1-5	73	11723		tRNA-Gln-CTG-3-1	73	3029
tRNA-Arg-CCG-2-1	74	4639		tRNA-Gln-CTG-1-2	73	10632		tRNA-Arg-ACG-1-1	74	2866
tRNA-Lys-TTT-3-5	74	4526		tRNA-Arg-CCG-1-3	74	9206		tRNA-Arg-CCG-2-1	74	2638
tRNA-Ser-AGA-1-1	83	3902		tRNA-Arg-CCG-2-1	74	8948		tRNA-Gln-CTG-3-2	73	2486
tRNA-Asp-GTC-1-1	73	3579		tRNA-Arg-TCG-4-1	74	7959		tRNA-Arg-CCG-1-1	74	1625
tRNA-Lys-CTT-3-1	74	3408		tRNA-Arg-TCG-5-1	74	7347		tRNA-Arg-ACG-2-2	74	1366
tRNA-Ala-AGC-4-1	73	3141		tRNA-Gln-TTG-4-1	73	5551		tRNA-Gln-CTG-9-1	73	1118
tRNA-Lys-CTT-1-1	74	2932		tRNA-His-GTG-1-2	73	5144		tRNA-Arg-TCG-3-1	74	1091
tRNA-Arg-TCG-2-1	74	2849		tRNA-Gln-CTG-9-1	73	4906		tRNA-Arg-ACG-2-4	74	1043
tRNA-Glu-CTC-2-1	73	2742		tRNA-Lys-TTT-3-5	74	4455		tRNA-Gln-CTG-4-1	73	823
tRNA-Glu-TTC-1-1	73	2629		tRNA-Arg-ACG-2-2	74	4005		tRNA-Arg-ACG-1-2	74	780
tRNA-Arg-TCG-4-1	74	2578		tRNA-Gln-CTG-3-2	73	3678		tRNA-Lys-CTT-10-1	77	774
tRNA-Gln-CTG-4-2	73	2484		tRNA-Gln-CTG-5-1	73	3574		tRNA-iMet-CAT-1-4	73	731
tRNA-Arg-CCG-1-1	74	2362		tRNA-Lys-CTT-chr15-5	61	3042		tRNA-His-GTG-1-2	73	701
tRNA-Pro-TGG-3-1	73	2331		tRNA-Gln-CTG-3-1	73	2934		tRNA-Arg-TCG-5-1	74	467
tRNA-Gln-CTG-2-1	73	2302		tRNA-Arg-ACG-1-2	74	2903		tRNA-Arg-TCG-6-1	74	277
nm-tRNA-Tyr-GTA-chr9-10	67	2019		tRNA-Asp-GTC-2-6	73	2658		tRNA-iMet-CAT-2-1	73	211
tRNA-Val-TAC-2-1	74	1987		tRNA-iMet-CAT-1-4	73	2582		tRNA-Gln-CTG-12-1	74	203
tRNA-Tyr-GTA-3-1	90	1883		tRNA-Asp-GTC-2-8	73	2429		tRNA-Lys-TTT-4-1	74	200
tRNA-Asn-GTT-2-1	75	1839		tRNA-Arg-ACG-2-4	74	2278		tRNA-Lys-TTT-3-5	74	193
tRNA-Thr-AGT-6-1	75	1817		tRNA-Asp-GTC-2-7	73	2200		tRNA-Gln-CTG-chr19-4	69	169
tRNA-Arg-CCG-1-2	74	1790		tRNA-Gln-CTG-chr19-4	69	1437		tRNA-Arg-CCT-4-1	74	162
tRNA-Pro-CGG-1-1	73	1771		tRNA-Arg-ACG-2-3	74	1423		tRNA-Arg-ACG-2-3	74	152
tRNA-Gly-TCC-1-1	73	1669		tRNA-Lys-CTT-3-1	74	1231		tRNA-Gln-CTG-8-1	73	140
tRNA-Gly-GCC-2-5	72	1609		tRNA-Lys-CTT-1-1	74	919		tRNA-Arg-CCG-1-2	74	125
tRNA-Thr-AGT-1-3	75	1608		tRNA-Gln-CTG-7-1	73	838		tRNA-Gln-CTG-7-1	73	123
tRNA-Lys-CTT-10-1	77	1605		tRNA-Gln-CTG-12-1	74	663		tRNA-Arg-CCG-1-3	74	119
tRNA-Lys-TTT-6-1	74	1556		tRNA-Asp-GTC-1-1	73	651		tRNA-Gln-CTG-10-1	73	107
tRNA-Val-CAC-1-4	74	1542		tRNA-Lys-TTT-5-1	74	581		tRNA-Phe-GAA-5-1	74	79
tRNA-Glu-CTC-1-1	73	1539		tRNA-Glu-CTC-2-1	73	579		tRNA-Glu-CTC-2-1	73	71
tRNA-Lys-CTT-chr7-30	69	1493		tRNA-Phe-GAA-1-4	74	550		tRNA-Lys-CTT-chr15-5	61	67
tRNA-Gln-CTG-4-1	73	1380		tRNA-Ala-AGC-3-1	76	458		tRNA-His-GTG-1-6	73	64
tRNA-Lys-CTT-chr15-5	61	1373		tRNA-Leu-CAG-1-1	84	425		tRNA-Gln-CTG-8-2	73	62
tRNA-Ala-AGC-8-1	74	1334		tRNA-Gln-CTG-10-1	73	416		tRNA-Phe-GAA-1-4	74	61
tRNA-Gln-CTG-7-1	73	1299		tRNA-Leu-CAA-1-2	106	388		tRNA-Val-TAC-2-1	74	58
tRNA-Gly-CCC-1-2	72	1290		tRNA-Gly-CCC-2-2	72	383		tRNA-Asp-GTC-2-8	73	53
tRNA-Pro-TGG-2-1	73	1283		tRNA-Arg-CCT-4-1	74	371		tRNA-Gly-CCC-2-2	72	53
tRNA-Asp-GTC-2-10	73	1265		tRNA-Gly-TCC-2-6	73	342		tRNA-Glu-TTC-2-1	73	46
tRNA-Asp-GTC-2-9	73	1241		tRNA-Arg-TCG-6-1	74	339		tRNA-Lys-TTT-6-1	74	44
tRNA-Arg-CCG-1-3	74	1216		tRNA-Lys-TTT-14-1	63	314		tRNA-Lys-CTT-1-1	74	41
tRNA-Lys-CTT-8-1	74	1170		tRNA-Gln-CTG-8-2	73	305		tRNA-Cys-GCA-5-1	74	40
tRNA-Tyr-GTA-2-1	90	1153		tRNA-Lys-CTT-chr7-30	69	271		tRNA-Lys-CTT-2-5	74	36
tRNA-Gly-GCC-2-4	72	1149		tRNA-Lys-TTT-6-1	74	271		tRNA-SeC-TCA-3-1	75	36
tRNA-Gly-GCC-2-1	72	1145		tRNA-Gln-CTG-8-1	73	258		tRNA-Asp-GTC-2-7	73	34
tRNA-Gly-GCC-1-2	72	1138		tRNA-Lys-TTT-4-1	74	239		tRNA-Glu-CTC-1-1	73	34
tRNA-Gln-TTG-3-3	73	1120		tRNA-Thr-AGT-6-1	75	232		tRNA-Asp-GTC-2-6	73	33
tRNA-Ile-AAT-1-1	75	1094		tRNA-Val-AAC-2-1	74	222		tRNA-Gln-CAG-chr9-3	61	33
tRNA-Ile-AAT-5-3	75	1066		tRNA-Lys-CTT-8-1	74	221		tRNA-Gly-GCC-2-6	72	33
tRNA-Gln-CTG-1-3	73	1063		tRNA-Ile-AAT-1-1	75	217		tRNA-Val-AAC-2-1	74	32
tRNA-Leu-TAG-2-1	83	1049		tRNA-Leu-TAG-3-1	83	210		tRNA-Lys-CTT-3-1	74	28
tRNA-Arg-TCG-5-1	74	1044		tRNA-Asp-GTC-2-9	73	207		tRNA-Ala-AGC-4-1	73	27
tRNA-Gly-GCC-1-4	72	1019		tRNA-Tyr-GTA-2-1	90	203		tRNA-Leu-CAG-1-1	84	25
tRNA-Gln-CTG-1-1	73	1007		tRNA-Asn-GTT-2-1	75	198		tRNA-Gly-GCC-1-5	72	24
tRNA-Asp-GTC-2-2	73	988		tRNA-Gly-GCC-2-3	72	196		tRNA-Lys-TTT-14-1	63	24
tRNA-SeC-TCA-1-1	98	969		tRNA-Phe-GAA-4-1	75	193		tRNA-Lys-TTT-3-1	74	24
tRNA-Pro-AGG-2-5	73	959		tRNA-Ser-GCT-3-1	83	193		tRNA-Cys-GCA-7-1	74	23
tRNA-Met-CAT-6-1	74	959		tRNA-Trp-CCA-2-1	73	193		tRNA-Arg-CCT-3-1	74	21
tRNA-Thr-CGT-1-1	75	941		tRNA-Asp-GTC-2-10	73	186		tRNA-Arg-TCT-1-1	86	21
tRNA-Gln-TTG-3-1	73	937		tRNA-Gly-GCC-2-6	72	184		tRNA-Lys-TTT-5-1	74	21
tRNA-Ser-CGA-4-1	83	935		tRNA-Lys-TTT-1-1	74	182		tRNA-Leu-AAG-1-2	83	20
tRNA-Ser-GCT-3-1	83	930		tRNA-Lys-CTT-10-1	77	181		tRNA-Leu-AAG-5-1	74	20
tRNA-Pro-TGG-3-4	73	902		tRNA-His-GTG-1-6	73	176		tRNA-Asn-GTT-2-1	75	19
tRNA-Arg-ACG-2-2	74	901		tRNA-Gly-GCC-1-5	72	172		tRNA-Cys-GCA-17-1	73	19
tRNA-Ile-AAT-7-2	75	858		tRNA-Ser-AGA-1-1	83	168		tRNA-iMet-CAT-1-1	73	17
tRNA-Pro-AGG-2-6	73	847		tRNA-Ile-AAT-8-1	75	162		tRNA-Glu-TTC-1-1	73	16
tRNA-Ser-TGA-2-1	83	839		tRNA-Leu-AAG-5-1	74	162		tRNA-Gly-GCC-2-3	72	16
tRNA-Asp-GTC-2-3	73	815		tRNA-Asp-GTC-2-2	73	158		tRNA-His-GTG-1-9	73	16
tRNA-Thr-CGT-3-1	75	794		tRNA-Leu-TAG-2-1	83	158		tRNA-iMet-CAT-1-5	73	16
tRNA-Asp-GTC-2-1	73	782		tRNA-Ile-AAT-7-2	75	152		tRNA-Val-AAC-1-2	74	16
tRNA-Lys-TTT-4-1	74	779		tRNA-Lys-CTT-2-1	74	152		tRNA-His-GTG-1-5	73	15
tRNA-Lys-CTT-2-4	74	772		tRNA-Leu-TAA-1-1	84	150		tRNA-iMet-CAT-1-2	73	15
tRNA-Gly-GCC-1-1	72	768		tRNA-Leu-TAA-3-1	84	145		tRNA-Arg-TCT-3-2	87	14
tRNA-Gly-GCC-2-2	72	751		tRNA-Pro-CGG-1-1	73	145		tRNA-Leu-TAG-3-1	83	14
tRNA-Thr-AGT-1-1	75	750		tRNA-Tyr-GTA-4-1	95	145		tRNA-Lys-TTT-1-1	74	14
tRNA-Gly-GCC-1-3	72	718		tRNA-Val-AAC-1-2	74	142		tRNA-Ser-GCT-4-2	83	14
tRNA-Asp-GTC-2-5	73	712		tRNA-Asp-GTC-2-1	73	136		tRNA-Trp-CCA-2-1	73	14
tRNA-Lys-CTT-2-5	74	712		tRNA-Glu-TTC-1-1	73	135		tRNA-Trp-CCA-4-1	73	14
tRNA-Arg-CCT-4-1	74	710		tRNA-Ser-AGA-2-4	83	130		tRNA-Gln-CTG-11-1	73	13
tRNA-Lys-CTT-2-1	74	685		tRNA-Lys-TTT-3-1	74	124		tRNA-Leu-TAA-1-1	84	13
tRNA-Thr-AGT-1-2	75	683		tRNA-Lys-CTT-2-4	74	123		tRNA-Trp-CCA-1-1	73	13
tRNA-Gly-GCC-3-1	72	679		tRNA-iMet-CAT-2-1	73	122		tRNA-Cys-GCA-4-1	73	12
tRNA-Val-TAC-3-1	74	669		tRNA-Asp-GTC-2-3	73	121		tRNA-Gly-GCC-2-5	72	12
tRNA-Ala-AGC-3-1	76	655		tRNA-Leu-CAG-1-6	84	120		tRNA-Lys-CTT-1-2	74	12
tRNA-Leu-TAG-3-1	83	650		tRNA-Pro-TGG-3-1	73	119		tRNA-Val-TAC-1-2	74	12
tRNA-Asp-GTC-2-11	73	647		tRNA-Ile-AAT-5-1	75	118		tRNA-Leu-CAA-1-2	106	11
tRNA-Pro-AGG-2-7	73	640		tRNA-Glu-TTC-3-1	73	116		tRNA-Pro-CGG-1-1	73	11
tRNA-Lys-CTT-4-1	74	639		tRNA-Asp-GTC-2-11	73	112		tRNA-Val-CAC-1-2	74	11
tRNA-Thr-AGT-4-1	75	639		tRNA-Lys-CTT-1-2	74	111		tRNA-Ala-AGC-11-1	74	10
tRNA-Thr-AGT-2-1	75	633		tRNA-Thr-AGT-1-3	75	109		tRNA-Asp-GTC-2-10	73	10
tRNA-Lys-TTT-5-1	74	627		tRNA-Asp-GTC-2-5	73	108		tRNA-Cys-GCA-2-2	73	10
tRNA-Met-CAT-1-1	74	619		tRNA-Ile-AAT-5-3	75	108		tRNA-Cys-GCA-6-1	73	10
tRNA-Pro-CGG-1-3	73	583		tRNA-Ala-AGC-11-1	74	107		tRNA-Gly-TCC-2-6	73	10
tRNA-Ile-AAT-8-1	75	578		tRNA-Lys-CTT-4-1	74	104		tRNA-Val-CAC-1-6	74	10
tRNA-Asp-GTC-2-4	73	573		tRNA-Pro-TGG-2-1	73	101		tRNA-Asp-GTC-1-1	73	9
tRNA-Ile-AAT-5-1	75	563		tRNA-Asp-GTC-2-4	73	100		tRNA-Asp-GTC-2-2	73	9
tRNA-Val-TAC-1-2	74	555		tRNA-Ala-AGC-4-1	73	98		tRNA-iMet-CAT-1-7	73	9
tRNA-Phe-GAA-1-4	74	543		tRNA-Val-CAC-2-1	74	98		tRNA-Lys-CTT-2-4	74	9
tRNA-Lys-TTT-14-1	63	540		tRNA-Val-TAC-2-1	74	98		tRNA-Lys-TTT-3-2	74	9
tRNA-Ser-AGA-2-4	83	529		tRNA-Thr-CGT-1-1	75	96		tRNA-Thr-AGT-2-1	75	9
tRNA-Leu-AAG-1-2	83	516		tRNA-Leu-CAA-4-1	107	95		tRNA-Val-AAC-1-3	74	9
tRNA-His-GTG-1-6	73	503		tRNA-Lys-CTT-2-5	74	95		tRNA-Val-CAC-2-1	74	9
tRNA-Gln-CTG-1-2	73	501		tRNA-Ala-AGC-8-1	74	94		tRNA-Val-CAC-3-1	74	9
tRNA-Gly-GCC-5-1	72	500		tRNA-Ile-AAT-5-4	75	94		tRNA-Glu-CTC-1-6	73	8
tRNA-Glu-CTC-1-6	73	496		tRNA-SeC-TCA-1-1	98	94		tRNA-Glu-CTC-1-7	73	8
tRNA-Arg-TCT-1-1	86	495		tRNA-Leu-CAA-2-1	109	93		tRNA-His-GTG-2-1	73	8
tRNA-Gln-CTG-1-5	73	491		tRNA-Thr-AGT-1-1	75	92		tRNA-Lys-CTT-2-1	74	8
tRNA-Gly-CCC-1-1	72	487		tRNA-Thr-CGT-3-1	75	92		tRNA-Lys-TTT-3-4	74	8
tRNA-Cys-GCA-4-1	73	481		tRNA-Ile-AAT-2-1	75	90		tRNA-Pro-AGG-2-1	73	8
tRNA-Arg-ACG-2-4	74	472		tRNA-Tyr-GTA-5-3	95	90		tRNA-Pro-TGG-3-4	73	8
tRNA-Lys-CTT-11-1	72	467		tRNA-Gly-CCC-1-2	72	89		tRNA-Thr-CGT-6-1	73	8
tRNA-Ala-CGC-2-1	73	450		tRNA-Cys-GCA-4-1	73	88		tRNA-Tyr-GTA-2-1	90	8
tRNA-Val-AAC-1-2	74	445		tRNA-Arg-CCT-3-1	74	87		tRNA-Val-CAC-1-1	74	8
tRNA-Thr-TGT-1-1	75	444		tRNA-Thr-AGT-1-2	75	87		tRNA-Ala-AGC-1-1	73	7
tRNA-Gln-CTG-5-1	73	430		tRNA-Val-AAC-3-1	74	87		tRNA-Asp-GTC-2-11	73	7
nmt-tRNA-Gln-TTG-9-1	73	425		tRNA-Ser-TGA-1-1	83	86		tRNA-Glu-TTC-3-1	73	7
tRNA-Ala-AGC-8-2	74	421		tRNA-Pro-AGG-2-5	73	85		tRNA-Gly-CCC-2-1	72	7
tRNA-Asp-GTC-5-1	73	420		tRNA-Lys-CTT-5-1	74	82		tRNA-Ile-AAT-5-3	75	7
tRNA-Leu-CAA-1-2	106	418		tRNA-Val-CAC-1-4	74	82		tRNA-Leu-TAG-2-1	83	7
tRNA-Arg-CCT-3-1	74	417		tRNA-Lys-CTT-11-1	72	80		tRNA-Lys-CTT-4-1	74	7
tRNA-Ile-AAT-7-1	75	416		tRNA-Met-CAT-6-1	74	80		tRNA-Phe-GAA-4-1	75	7
tRNA-Pro-AGG-2-1	73	412		tRNA-Pro-TGG-3-4	73	78		tRNA-Pro-AGG-2-5	73	7
tRNA-Tyr-GTA-4-1	95	409		tRNA-Leu-TAG-1-1	83	76		tRNA-Pro-TGG-3-1	73	7
tRNA-Arg-ACG-1-2	74	408		tRNA-Ser-CGA-4-1	83	76		tRNA-Ser-TGA-1-1	83	7
tRNA-Ile-AAT-2-1	75	403		tRNA-Ala-AGC-8-2	74	73		tRNA-Val-AAC-6-1	73	7
tRNA-Tyr-GTA-5-4	95	402		tRNA-Pro-AGG-2-6	73	73		tRNA-Ala-AGC-8-1	74	6
tRNA-Ala-CGC-3-1	73	396		tRNA-Asp-GTC-5-1	73	70		tRNA-Asn-GTT-1-1	75	6
tRNA-Ser-TGA-1-1	83	394		tRNA-Ile-AAT-3-1	75	70		tRNA-Cys-GCA-1-1	73	6
tRNA-Gln-CTG-3-1	73	378		tRNA-Thr-AGT-4-1	75	70		tRNA-Glu-TTC-8-1	74	6
tRNA-Ile-AAT-5-4	75	378		tRNA-Ser-GCT-1-1	83	68		tRNA-Gly-GCC-5-1	72	6
tRNA-Val-AAC-1-3	74	368		tRNA-Arg-TCT-3-2	87	67		tRNA-Lys-CTT-chr7-30	69	6
tRNA-Pro-TGG-3-5	73	366		tRNA-Glu-TTC-2-1	73	67		tRNA-Lys-TTT-3-3	74	6
tRNA-Lys-CTT-5-1	74	363		tRNA-Ile-AAT-7-1	75	67		tRNA-Pro-CGG-1-3	73	6
tRNA-Thr-TGT-3-1	74	360		tRNA-Ser-CGA-2-1	83	67		tRNA-Pro-TGG-2-1	73	6
tRNA-Val-CAC-1-6	74	348		tRNA-Val-AAC-1-3	74	67		tRNA-Pro-TGG-3-5	73	6
tRNA-Thr-AGT-3-1	75	347		tRNA-Asp-GTC-3-1	73	65		tRNA-Ser-GCT-3-1	83	6
tRNA-Gln-CTG-3-2	73	346		tRNA-His-GTG-1-1	73	64		tRNA-Thr-AGT-6-1	75	6
tRNA-Leu-CAA-4-1	107	346		tRNA-Tyr-GTA-5-4	95	64		tRNA-Tyr-GTA-3-1	90	6
tRNA-Thr-TGT-4-1	74	346		tRNA-Gly-CCC-7-1	62	61		tRNA-Tyr-GTA-5-4	95	6
tRNA-Thr-CGT-2-1	73	345		tRNA-Trp-CCA-5-1	73	60		tRNA-Val-CAC-1-4	74	6
tRNA-Lys-TTT-3-1	74	344		tRNA-Tyr-GTA-8-1	91	60		tRNA-Val-TAC-1-1	74	6
tRNA-Val-CAC-2-1	74	344		tRNA-Ile-AAT-4-1	75	59		tRNA-Arg-TCT-2-1	89	5
tRNA-Pro-TGG-1-1	73	343		tRNA-Cys-GCA-17-1	73	58		tRNA-Asp-GTC-2-1	73	5
tRNA-Tyr-GTA-5-3	95	340		tRNA-Tyr-GTA-3-1	90	58		tRNA-Gly-CCC-1-2	72	5
tRNA-Arg-ACG-2-3	74	336		tRNA-Glu-CTC-1-1	73	57		tRNA-Gly-GCC-2-1	72	5
tRNA-Pro-CGG-2-1	73	334		tRNA-Thr-TGT-1-1	75	57		tRNA-His-GTG-1-3	73	5
tRNA-Ala-AGC-2-2	73	331		tRNA-His-GTG-1-5	73	56		tRNA-His-GTG-1-4	73	5
tRNA-Pro-TGG-3-2	73	329		tRNA-Leu-AAG-1-2	83	54		tRNA-Leu-TAA-3-1	84	5
tRNA-Glu-CTC-1-3	73	325		tRNA-Thr-AGT-3-1	75	54		tRNA-Lys-CTT-2-3	74	5
tRNA-Gln-TTG-4-1	73	319		tRNA-Met-CAT-1-1	74	52		tRNA-Lys-CTT-5-1	74	5
tRNA-Ile-AAT-5-5	75	317		tRNA-Tyr-GTA-5-5	90	52		tRNA-Lys-TTT-2-1	74	5
tRNA-Leu-AAG-3-1	83	312		tRNA-Lys-TTT-3-3	74	50		tRNA-Met-CAT-1-1	74	5
tRNA-Val-CAC-1-2	74	312		tRNA-Val-CAC-3-1	74	50		tRNA-Pro-AGG-2-6	73	5
tRNA-Asn-GTT-1-1	75	301		tRNA-SeC-TCA-3-1	75	49		tRNA-Pro-AGG-2-7	73	5
tRNA-Val-AAC-1-1	74	298		tRNA-Leu-CAA-1-1	107	47		tRNA-Pro-CGG-2-1	73	5
tRNA-Val-CAC-1-5	74	294		tRNA-Pro-CGG-1-3	73	47		tRNA-Ser-AGA-1-1	83	5
tRNA-Leu-TAA-1-1	84	287		tRNA-Ile-GAT-1-3	75	45		tRNA-Thr-CGT-1-1	75	5
tRNA-iMet-CAT-2-1	73	284		tRNA-Ile-AAT-5-2	75	44		tRNA-Thr-TGT-4-1	74	5
tRNA-Ala-AGC-11-1	74	270		tRNA-Ile-AAT-5-5	75	44		nm-tRNA-Tyr-GTA-chr21-2	67	4
tRNA-Ile-GAT-1-3	75	268		tRNA-Pro-AGG-2-7	73	44		tRNA-Ala-AGC-3-1	76	4
tRNA-Tyr-GTA-5-5	90	264		tRNA-Cys-GCA-2-2	73	43		tRNA-Ala-TGC-6-1	73	4
tRNA-Glu-CTC-1-7	73	260		tRNA-Gln-CTG-11-1	73	43		tRNA-Arg-CCT-1-1	74	4
tRNA-Arg-CCT-1-1	74	257		tRNA-Leu-TAA-4-1	84	43		tRNA-Asn-ATT-1-1	75	4
tRNA-Ile-AAT-6-1	75	257		tRNA-Gly-TCC-3-1	73	42		tRNA-Asp-GTC-2-3	73	4
tRNA-Leu-CAG-1-1	84	252		tRNA-Phe-GAA-5-1	74	42		tRNA-Asp-GTC-2-5	73	4
tRNA-Met-CAT-3-1	74	244		tRNA-Glu-CTC-1-6	73	41		tRNA-Asp-GTC-2-9	73	4
tRNA-Glu-CTC-3-1	73	244		tRNA-Thr-AGT-2-1	75	41		tRNA-Cys-GCA-8-1	73	4
tRNA-Ile-AAT-4-1	75	236		tRNA-Gly-TCC-1-1	73	40		tRNA-Glu-CTC-1-2	73	4
tRNA-Pro-AGG-2-8	73	229		tRNA-Lys-TTT-7-1	74	40		tRNA-Glu-CTC-1-4	73	4
tRNA-Ile-AAT-5-2	75	227		tRNA-Val-AAC-1-1	74	40		tRNA-Gly-GCC-1-3	72	4
tRNA-Asp-GTC-3-1	73	217		tRNA-Lys-CTT-16-1	75	39		tRNA-His-GTG-1-7	73	4
tRNA-Glu-TTC-4-1	73	217		tRNA-Lys-CTT-2-3	74	39		tRNA-Ile-AAT-5-1	75	4
tRNA-Ile-GAT-1-1	75	214		tRNA-Ala-CGC-3-1	73	38		tRNA-iMet-CAT-1-6	73	4
tRNA-Pro-AGG-1-1	73	214		tRNA-Arg-TCT-2-1	89	38		tRNA-Leu-AAG-3-1	83	4
tRNA-Ala-TGC-3-1	73	211		tRNA-Trp-CCA-4-1	73	38		tRNA-Leu-CAG-1-6	84	4
tRNA-Lys-CTT-2-3	74	208		tRNA-Lys-TTT-2-1	74	37		tRNA-Lys-CTT-11-1	72	4
tRNA-Ile-TAT-1-1	94	208		tRNA-Ile-GAT-1-1	75	36		tRNA-Lys-CTT-2-2	74	4
tRNA-Cys-GCA-17-1	73	204		tRNA-Arg-TCT-1-1	86	35		tRNA-Pro-TGG-1-1	73	4
tRNA-Trp-CCA-2-1	73	201		tRNA-His-GTG-1-3	73	35		tRNA-Thr-CGT-3-1	75	4
tRNA-Arg-CCT-2-1	74	200		tRNA-Lys-TTT-3-4	74	35		tRNA-Trp-CCA-5-1	73	4
tRNA-Pro-CGG-1-2	73	198		nmt-tRNA-Gln-TTG-9-1	73	34		tRNA-Val-TAC-3-1	74	4
tRNA-Ala-AGC-5-1	73	196		tRNA-Ala-AGC-2-2	73	34		tRNA-Ala-AGC-2-2	73	3
tRNA-Lys-CTT-1-2	74	195		tRNA-Arg-TCT-3-1	92	34		tRNA-Ala-TGC-1-1	73	3
tRNA-Pro-AGG-2-2	73	185		tRNA-Gly-CCC-3-1	72	34		tRNA-Ala-TGC-5-1	73	3
tRNA-Glu-TTC-3-1	73	184		tRNA-Gly-CCC-5-1	72	33		tRNA-Asn-GTT-17-1	75	3
tRNA-Arg-TCT-3-2	87	184		tRNA-Leu-CAG-2-1	84	33		tRNA-Cys-GCA-2-1	73	3
tRNA-Gly-CCC-3-1	72	182		tRNA-Ala-TGC-4-1	73	32		tRNA-Gln-TTG-6-1	74	3
tRNA-Glu-CTC-1-2	73	182		tRNA-Glu-TTC-5-1	73	32		tRNA-Ile-AAT-8-1	75	3
tRNA-Pro-AGG-2-4	73	181		tRNA-Asp-GTC-4-1	73	31		tRNA-Leu-AAG-4-1	83	3
tRNA-Leu-AAG-2-3	83	180		tRNA-Ser-GCT-5-1	83	31		tRNA-Leu-CAA-3-1	108	3
tRNA-Leu-CAA-1-1	107	178		tRNA-Ala-TGC-5-1	73	30		tRNA-Leu-TAG-1-1	83	3
tRNA-Leu-CAG-1-6	84	177		tRNA-Asn-GTT-1-1	75	30		tRNA-Lys-CTT-16-1	75	3
tRNA-Gly-CCC-7-1	62	174		tRNA-Trp-CCA-1-1	73	29		tRNA-Met-CAT-6-1	74	3
tRNA-Tyr-GTA-8-1	91	171		tRNA-Val-TAC-1-2	74	29		tRNA-Pro-AGG-2-4	73	3
tRNA-Gln-CTG-chr19-4	69	165		tRNA-Ala-CGC-2-1	73	28		tRNA-Pro-CGG-1-2	73	3
tRNA-Val-CAC-1-1	74	162		tRNA-Lys-CTT-chr16-1	77	27		tRNA-SeC-TCA-1-1	98	3
tRNA-Thr-AGT-2-2	75	161		nm-tRNA-Tyr-GTA-chr21-2	67	26		tRNA-Ser-AGA-2-4	83	3
tRNA-Val-CAC-3-1	74	156		tRNA-Ala-AGC-6-1	73	26		tRNA-Ser-GCT-4-1	83	3
tRNA-Pro-AGG-2-3	73	155		tRNA-Glu-CTC-1-3	73	26		tRNA-Ser-GCT-5-1	83	3
tRNA-Ala-TGC-3-2	73	154		tRNA-His-GTG-1-9	73	26		tRNA-Ser-TGA-4-1	83	3
tRNA-Ser-CGA-2-1	83	152		tRNA-Pro-CGG-2-1	73	26		tRNA-Thr-AGT-1-3	75	3
tRNA-Thr-AGT-5-1	75	151		tRNA-Val-AAC-6-1	73	26		tRNA-Thr-TGT-1-1	75	3
tRNA-Gly-TCC-2-1	73	151		tRNA-His-GTG-1-8	73	25		tRNA-Val-CAC-1-3	74	3
tRNA-Val-TAC-1-1	74	150		tRNA-Ile-TAT-1-1	94	25		nmt-tRNA-Gln-TTG-3-1	73	2
tRNA-Thr-CGT-4-1	73	148		tRNA-Leu-AAG-3-1	83	25		tRNA-Ala-CGC-1-1	73	2
tRNA-Asn-GTT-5-1	75	141		tRNA-Pro-AGG-2-1	73	25		tRNA-Ala-CGC-3-1	73	2
tRNA-Val-CAC-1-3	74	141		tRNA-Ala-CGC-4-1	73	24		tRNA-Ala-TGC-3-2	73	2
tRNA-Leu-TAG-1-1	83	140		tRNA-His-GTG-1-4	73	24		tRNA-Arg-CCT-2-1	74	2
tRNA-Ala-TGC-4-1	73	140		tRNA-Leu-AAG-2-4	83	24		tRNA-Arg-TCT-5-1	88	2
tRNA-Gln-CTG-9-1	73	139		tRNA-Lys-CTT-14-1	74	24		tRNA-Asn-GTT-16-1	75	2
tRNA-Asn-GTT-3-2	75	135		tRNA-Lys-TTT-3-2	74	24		tRNA-Asn-GTT-16-2	75	2
tRNA-Ser-GCT-4-2	83	135		tRNA-Pro-AGG-2-8	73	24		tRNA-Asn-GTT-2-6	75	2
tRNA-His-GTG-1-1	73	133		tRNA-Thr-TGT-3-1	74	24		tRNA-Asn-GTT-3-2	75	2
nmt-tRNA-Gln-TTG-3-1	73	133		tRNA-Glu-CTC-1-7	73	23		tRNA-Asn-GTT-8-1	75	2
tRNA-Pro-TGG-3-3	73	133		tRNA-Gly-GCC-2-1	72	23		tRNA-Asp-GTC-2-4	73	2
tRNA-Trp-CCA-5-1	73	131		tRNA-Lys-CTT-2-2	74	23		tRNA-Asp-GTC-5-1	73	2
tRNA-Lys-TTT-1-1	74	130		tRNA-Thr-TGT-2-1	74	23		tRNA-Glu-CTC-1-5	73	2
tRNA-Ala-TGC-6-1	73	130		tRNA-Gly-GCC-1-2	72	22		tRNA-Glu-CTC-3-1	73	2
tRNA-Ser-CGA-1-1	83	129		tRNA-Ile-GAT-1-2	75	22		tRNA-Glu-TTC-4-1	73	2
tRNA-Leu-AAG-2-4	83	127		tRNA-iMet-CAT-1-1	73	22		tRNA-Glu-TTC-4-2	73	2
tRNA-His-GTG-1-5	73	126		tRNA-Phe-GAA-2-1	74	22		tRNA-Glu-TTC-5-1	73	2
tRNA-Cys-GCA-2-2	73	126		tRNA-Pro-TGG-3-5	73	22		tRNA-Gly-CCC-1-1	72	2
tRNA-Ile-GAT-1-2	75	126		tRNA-Thr-CGT-2-1	73	22		tRNA-Gly-CCC-3-1	72	2
tRNA-Ile-TAT-2-1	94	126		tRNA-Thr-TGT-4-1	74	22		tRNA-Gly-CCC-6-1	62	2
tRNA-Asn-GTT-6-1	75	126		tRNA-Arg-CCT-1-1	74	21		tRNA-Gly-CCC-7-1	62	2
tRNA-Ser-GCT-1-1	83	123		tRNA-His-GTG-1-7	73	21		tRNA-Gly-GCC-1-4	72	2
tRNA-Glu-CTC-1-4	73	122		tRNA-iMet-CAT-1-5	73	21		tRNA-Gly-GCC-2-2	72	2
tRNA-Met-CAT-5-1	74	121		tRNA-Asn-GTT-17-1	75	20		tRNA-Gly-GCC-2-4	72	2
tRNA-Ser-AGA-3-1	83	121		tRNA-Cys-GCA-2-1	73	20		tRNA-Gly-GCC-3-1	72	2
tRNA-Leu-CAG-2-1	84	120		tRNA-Ile-AAT-6-1	75	20		tRNA-His-GTG-1-8	73	2
tRNA-Lys-CTT-2-2	74	120		tRNA-Leu-CAG-1-5	84	20		tRNA-Ile-GAT-1-1	75	2
tRNA-Met-CAT-2-1	74	119		tRNA-Val-CAC-1-1	74	20		tRNA-Ile-TAT-1-1	94	2
tRNA-Ile-AAT-3-1	75	118		tRNA-Pro-TGG-1-1	73	19		tRNA-iMet-CAT-1-8	73	2
tRNA-Trp-CCA-1-1	73	118		tRNA-Ala-TGC-1-1	73	18		tRNA-Leu-CAA-1-1	107	2
tRNA-His-GTG-1-3	73	116		tRNA-Glu-TTC-4-1	73	18		tRNA-Leu-CAG-1-5	84	2
tRNA-Gly-TCC-3-1	73	108		tRNA-Leu-AAG-2-3	83	18		tRNA-Lys-CTT-6-1	77	2
tRNA-Arg-TCT-3-1	92	108		tRNA-Ser-GCT-6-1	79	17		tRNA-Lys-CTT-8-1	74	2
tRNA-Val-AAC-6-1	73	108		tRNA-Thr-AGT-2-2	75	17		tRNA-Pro-AGG-2-8	73	2
tRNA-iMet-CAT-1-1	73	107		tRNA-Val-AAC-1-5	74	17		tRNA-Pro-TGG-3-3	73	2
tRNA-Val-AAC-2-1	74	102		tRNA-Ala-TGC-6-1	73	16		tRNA-Ser-AGA-2-3	83	2
tRNA-His-GTG-1-8	73	102		tRNA-Met-CAT-5-1	74	16		tRNA-Ser-GCT-1-1	83	2
tRNA-His-GTG-1-9	73	101		tRNA-Thr-CGT-6-1	73	16		tRNA-Thr-AGT-1-1	75	2
tRNA-Phe-GAA-4-1	75	100		tRNA-Val-CAC-8-1	72	16		tRNA-Thr-AGT-4-1	75	2
tRNA-Glu-TTC-9-1	72	100		tRNA-iMet-CAT-1-2	73	15		tRNA-Thr-CGT-2-1	73	2
tRNA-Lys-TTT-3-3	74	96		tRNA-Lys-CTT-6-1	77	15		tRNA-Tyr-GTA-8-1	91	2
tRNA-His-GTG-1-7	73	96		tRNA-Ser-TGA-2-1	83	15		tRNA-Val-AAC-1-1	74	2
tRNA-iMet-CAT-1-5	73	95		tRNA-Val-CAC-1-2	74	15		tRNA-Val-AAC-1-4	74	2
tRNA-Glu-TTC-8-1	74	94		tRNA-Ala-AGC-22-1	74	14		tRNA-Val-CAC-4-1	74	2
tRNA-Arg-TCT-2-1	89	90		tRNA-Glu-TTC-4-2	73	14		tRNA-Ala-AGC-6-1	73	1
tRNA-Lys-TTT-2-1	74	89		tRNA-Gly-CCC-4-1	72	14		tRNA-Ala-AGC-7-1	73	1
tRNA-Gly-CCC-6-1	62	87		tRNA-Gly-GCC-2-5	72	14		tRNA-Ala-CGC-2-1	73	1
tRNA-Gly-CCC-2-1	72	86		tRNA-Gly-GCC-3-1	72	14		tRNA-Ala-CGC-4-1	73	1
tRNA-Ser-AGA-2-1	83	86		tRNA-Ser-ACT-1-1	75	14		tRNA-Arg-CCT-5-1	74	1
tRNA-Ala-CGC-4-1	73	84		tRNA-Thr-AGT-5-1	75	14		tRNA-Arg-TCT-3-1	92	1
tRNA-Ser-ACT-1-1	75	83		tRNA-Arg-CCT-5-1	74	13		tRNA-Arg-TCT-4-1	75	1
tRNA-Val-AAC-1-5	74	82		tRNA-Arg-TCT-5-1	88	13		tRNA-Asn-GTT-16-5	75	1
tRNA-His-GTG-2-1	73	82		tRNA-Cys-GCA-14-1	73	13		tRNA-Asn-GTT-4-1	75	1
tRNA-Cys-ACA-1-1	177	80		tRNA-Gln-CAG-chr9-3	61	13		tRNA-Asp-GTC-3-1	73	1
tRNA-Lys-CTT-chr16-1	77	79		tRNA-Gly-GCC-1-4	72	13		tRNA-Asp-GTC-4-1	73	1
tRNA-Lys-TTT-3-4	74	75		tRNA-Gly-GCC-2-2	72	13		tRNA-Cys-GCA-10-1	73	1
tRNA-Ser-GCT-6-1	79	73		tRNA-Ile-TAT-2-1	94	13		tRNA-Cys-GCA-20-1	73	1
tRNA-Gly-TCC-2-2	73	73		tRNA-Leu-CAG-1-7	84	13		tRNA-Cys-GCA-23-1	73	1
tRNA-Asn-GTT-16-5	75	73		tRNA-Pro-CGG-1-2	73	13		tRNA-Glu-CTC-1-3	73	1
tRNA-Glu-TTC-4-2	73	71		tRNA-Ser-AGA-4-1	83	13		tRNA-Gly-TCC-3-1	73	1
tRNA-Asn-GTT-17-1	75	69		nm-tRNA-Tyr-GTA-chr14-8	67	12		tRNA-Ile-AAT-1-1	75	1
tRNA-Cys-GCA-7-1	74	69		tRNA-Arg-TCT-4-1	75	12		tRNA-Ile-AAT-3-1	75	1
tRNA-Asp-GTC-4-1	73	68		tRNA-His-GTG-2-1	73	12		tRNA-Ile-AAT-4-1	75	1
tRNA-Cys-GCA-3-1	73	68		tRNA-Met-CAT-3-1	74	12		tRNA-Ile-AAT-5-4	75	1
tRNA-Gly-TCC-2-3	73	68		tRNA-Pro-AGG-1-1	73	12		tRNA-Ile-AAT-5-5	75	1
tRNA-Gln-CTG-12-1	74	67		tRNA-Arg-CCT-2-1	74	11		tRNA-Ile-TAT-2-1	94	1
tRNA-Phe-GAA-5-1	74	66		tRNA-Asn-GTT-5-1	75	11		tRNA-Leu-AAG-2-2	83	1
tRNA-Asn-GTT-16-1	75	66		tRNA-Cys-GCA-2-4	73	11		tRNA-Leu-AAG-2-3	83	1
tRNA-Lys-TTT-3-2	74	65		tRNA-Cys-GCA-5-1	74	11		tRNA-Leu-CAG-2-2	84	1
tRNA-Leu-CAG-2-2	84	65		tRNA-Leu-CAG-2-2	84	11		tRNA-Leu-CAG-chr9-7	84	1
tRNA-Ser-CGA-3-1	83	65		tRNA-Phe-GAA-1-5	74	11		tRNA-Lys-CTT-14-1	74	1
tRNA-Leu-AAG-7-1	66	64		tRNA-Pro-AGG-2-2	73	11		tRNA-Lys-CTT-7-1	77	1
tRNA-Leu-CAG-1-5	84	63		tRNA-Pro-TGG-3-2	73	11		tRNA-Met-CAT-3-2	74	1
tRNA-Cys-GCA-5-1	74	63		tRNA-Val-TAC-3-1	74	11		tRNA-Phe-GAA-1-2	74	1
tRNA-iMet-CAT-1-2	73	61		tRNA-Ala-AGC-7-1	73	10		tRNA-Phe-GAA-10-1	63	1
tRNA-Asn-GTT-2-6	75	60		tRNA-Asn-GTT-3-2	75	10		tRNA-Pro-AGG-1-1	73	1
tRNA-Asn-GTT-2-3	75	60		tRNA-Lys-TTT-8-1	74	10		tRNA-Pro-AGG-2-2	73	1
tRNA-Trp-CCA-4-1	73	58		tRNA-Pro-AGG-2-3	73	10		tRNA-Pro-AGG-3-1	96	1
tRNA-Leu-TAA-4-1	84	57		tRNA-Val-CAC-1-5	74	10		tRNA-Pro-TGG-3-2	73	1
tRNA-Ala-TGC-2-1	73	57		tRNA-Val-CAC-1-6	74	10		tRNA-Ser-AGA-3-1	83	1
tRNA-Asn-ATT-1-1	75	56		tRNA-Gly-CCC-2-1	72	9		tRNA-Ser-CGA-1-1	83	1
tRNA-Lys-CTT-12-1	71	55		tRNA-Gly-CCC-6-1	62	9		tRNA-Ser-CGA-2-1	83	1
tRNA-Val-AAC-1-4	74	54		tRNA-Gly-GCC-1-1	72	9		tRNA-Ser-TGA-3-1	83	1
tRNA-His-GTG-1-4	73	53		tRNA-Leu-CAA-3-1	108	9		tRNA-Thr-AGT-1-2	75	1
tRNA-Ser-TGA-4-1	83	53		tRNA-Met-CAT-2-1	74	9		tRNA-Thr-AGT-3-1	75	1
tRNA-Ala-AGC-22-1	74	52		tRNA-Met-CAT-3-2	74	9		tRNA-Thr-AGT-5-1	75	1
tRNA-Lys-TTT-13-1	75	51		tRNA-Tyr-GTA-6-1	90	9		tRNA-Thr-TGT-2-1	74	1
tRNA-Ser-GCT-2-1	83	50		tRNA-Val-AAC-1-4	74	9		tRNA-Thr-TGT-3-1	74	1
tRNA-Pro-AGG-3-1	96	50		tRNA-Val-CAC-6-1	74	9		tRNA-Tyr-GTA-1-1	92	1
tRNA-Ala-TGC-5-1	73	49		tRNA-Glu-CTC-3-1	73	8		tRNA-Tyr-GTA-7-1	95	1
tRNA-Glu-CTC-1-5	73	49		tRNA-Leu-AAG-2-1	83	8		tRNA-Val-AAC-1-5	74	1
tRNA-Leu-AAG-2-1	83	48		tRNA-Leu-AAG-7-1	66	8		tRNA-Val-AAC-3-1	74	1
tRNA-Phe-GAA-10-1	63	48		tRNA-Ser-CGA-1-1	83	8		tRNA-Val-AAC-5-1	74	1
tRNA-Thr-TGT-2-1	74	46		tRNA-Ala-AGC-1-1	73	7		tRNA-Val-CAC-1-5	74	1
tRNA-Asn-GTT-16-4	75	46		tRNA-Ala-TGC-7-1	72	7		tRNA-Val-CAC-6-1	74	1
tRNA-Cys-GCA-2-1	73	45		tRNA-Asn-GTT-6-1	75	7		nm-tRNA-SerTGA-AGA-chr11-8	71	0
tRNA-Asn-GTT-4-1	75	45		tRNA-Cys-GCA-12-1	73	7		nm-tRNA-Tyr-GTA-chr1-125	67	0
tRNA-Cys-GCA-6-1	73	45		tRNA-Ser-AGA-2-1	83	7		nm-tRNA-Tyr-GTA-chr14-8	67	0
tRNA-Arg-TCG-6-1	74	44		tRNA-Ser-AGA-3-1	83	7		nm-tRNA-Tyr-GTA-chr9-10	67	0
tRNA-Ser-AGA-4-1	83	44		tRNA-Ser-GCT-4-2	83	7		nmt-tRNA-Gln-TTG-7-1	73	0
tRNA-Lys-CTT-7-1	77	44		tRNA-Ser-TGA-4-1	83	7		nmt-tRNA-Gln-TTG-9-1	73	0
tRNA-Ala-CGC-1-1	73	43		tRNA-Thr-CGT-4-1	73	7		tRNA-Ala-AGC-10-1	74	0
tRNA-Cys-GCA-10-1	73	43		tRNA-Val-AAC-5-1	74	7		tRNA-Ala-AGC-12-1	74	0
tRNA-Ser-AGA-2-3	83	39		tRNA-Val-CAC-1-3	74	7		tRNA-Ala-AGC-17-1	74	0
tRNA-Val-AAC-3-1	74	37		tRNA-Ala-CGC-1-1	73	6		tRNA-Ala-AGC-2-1	73	0
tRNA-Val-AAC-5-1	74	37		tRNA-Asn-GTT-2-5	75	6		tRNA-Ala-AGC-22-1	74	0
tRNA-Glu-TTC-10-1	74	37		tRNA-Cys-ACA-1-1	177	6		tRNA-Ala-AGC-5-1	73	0
tRNA-Ala-AGC-7-1	73	36		tRNA-Cys-GCA-7-1	74	6		tRNA-Ala-AGC-8-2	74	0
tRNA-Ser-AGA-2-6	83	35		tRNA-Glu-CTC-1-2	73	6		tRNA-Ala-AGC-9-2	74	0
tRNA-Asn-GTT-8-1	75	35		tRNA-Gly-GCC-1-3	72	6		tRNA-Ala-ATC-chr6-102	73	0
tRNA-Val-TAC-4-1	74	34		tRNA-Gly-TCC-2-1	73	6		tRNA-Ala-CGC-5-1	73	0
tRNA-Lys-CTT-16-1	75	31		tRNA-Leu-CAG-1-4	84	6		tRNA-Ala-TGC-2-1	73	0
tRNA-Thr-TGT-5-1	74	31		tRNA-Leu-CAG-chr9-7	84	6		tRNA-Ala-TGC-3-1	73	0
tRNA-Arg-TCT-4-1	75	30		tRNA-Lys-CTT-12-1	71	6		tRNA-Ala-TGC-4-1	73	0
tRNA-Gly-TCC-2-4	73	30		tRNA-Lys-CTT-7-1	77	6		tRNA-Ala-TGC-7-1	72	0
tRNA-Ala-AGC-1-1	73	27		tRNA-Phe-GAA-3-1	74	6		tRNA-Ala-TGC-8-1	73	0
tRNA-iMet-CAT-1-6	73	27		tRNA-Thr-TGT-6-1	73	6		tRNA-Asn-GTT-16-4	75	0
tRNA-Ser-TGA-3-1	83	27		tRNA-Trp-CCA-3-3	73	6		tRNA-Asn-GTT-2-2	75	0
tRNA-Ala-ATC-chr6-102	73	27		tRNA-Tyr-GTA-5-1	94	6		tRNA-Asn-GTT-2-3	75	0
tRNA-Gly-CCC-4-1	72	26		tRNA-Val-CAC-4-1	74	6		tRNA-Asn-GTT-2-5	75	0
tRNA-Lys-TTT-8-1	74	26		tRNA-Ala-TGC-2-1	73	5		tRNA-Asn-GTT-5-1	75	0
tRNA-Val-CAC-5-1	75	26		tRNA-Asn-GTT-2-6	75	5		tRNA-Asn-GTT-6-1	75	0
tRNA-Gln-CTG-8-1	73	25		tRNA-Gly-CCC-1-1	72	5		tRNA-Asn-GTT-7-1	75	0
tRNA-Phe-GAA-2-1	74	25		tRNA-Gly-GCC-5-1	72	5		tRNA-Asp-GTC-6-1	72	0
tRNA-Val-CAC-8-1	72	25		tRNA-iMet-CAT-1-3	73	5		tRNA-Cys-ACA-1-1	177	0
tRNA-Leu-AAG-4-1	83	25		tRNA-Leu-AAG-4-1	83	5		tRNA-Cys-GCA-12-1	73	0
tRNA-Lys-CTT-14-1	74	24		tRNA-Leu-TAA-5-1	84	5		tRNA-Cys-GCA-14-1	73	0
tRNA-Lys-CTT-6-1	77	24		tRNA-Phe-GAA-1-1	74	5		tRNA-Cys-GCA-16-1	73	0
tRNA-Leu-CAG-1-4	84	23		tRNA-Phe-GAA-1-6	74	5		tRNA-Cys-GCA-18-1	73	0
tRNA-Cys-GCA-8-1	73	23		tRNA-Ser-GCT-2-1	83	5		tRNA-Cys-GCA-2-4	73	0
tRNA-Gly-CCC-chr1-18	72	23		tRNA-Sup-TTA-1-1	72	5		tRNA-Cys-GCA-24-1	73	0
tRNA-Asn-GTT-16-2	75	23		tRNA-Thr-TGT-5-1	74	5		tRNA-Cys-GCA-3-1	73	0
tRNA-Ser-GCT-5-1	83	21		nm-tRNA-Tyr-GTA-chr1-125	67	4		tRNA-Cys-GCA-9-2	73	0
tRNA-Gly-CCC-chr1-15	72	21		nmt-tRNA-Gln-TTG-3-1	73	4		tRNA-Cys-GCA-chr11-21	57	0
tRNA-Thr-TGT-6-1	73	20		tRNA-Ala-CGC-5-1	73	4		tRNA-Glu-TTC-10-1	74	0
tRNA-Gly-CCC-5-1	72	19		tRNA-Ala-TGC-3-2	73	4		tRNA-Glu-TTC-6-1	73	0
tRNA-Tyr-GTA-1-1	92	19		tRNA-Asp-GTC-6-1	72	4		tRNA-Glu-TTC-7-1	73	0
tRNA-Leu-CAG-1-2	84	18		tRNA-Gly-GCC-2-4	72	4		tRNA-Glu-TTC-9-1	72	0
tRNA-Gln-CTG-10-1	73	17		tRNA-Ile-TAT-2-3	95	4		tRNA-Gly-CCC-4-1	72	0
tRNA-Gln-CTG-8-2	73	17		tRNA-Met-CAT-4-3	74	4		tRNA-Gly-CCC-5-1	72	0
tRNA-Leu-CAG-1-7	84	17		tRNA-Pro-AGG-2-4	73	4		tRNA-Gly-CCC-chr1-15	72	0
tRNA-Cys-GCA-2-4	73	17		tRNA-Ser-AGA-2-3	83	4		tRNA-Gly-CCC-chr1-18	72	0
tRNA-Phe-GAA-1-5	74	17		tRNA-Ser-GCT-4-3	83	4		tRNA-Gly-GCC-1-1	72	0
tRNA-Asn-GTT-2-5	75	16		tRNA-Und-NNN-2-1	70	4		tRNA-Gly-GCC-1-2	72	0
tRNA-Leu-CAG-chr9-7	84	16		tRNA-Ala-TGC-3-1	73	3		tRNA-Gly-GCC-4-1	72	0
tRNA-Ala-AGC-9-2	74	16		tRNA-Ala-TGC-8-1	73	3		tRNA-Gly-TCC-1-1	73	0
tRNA-Leu-AAG-5-1	74	14		tRNA-Asn-GTT-16-1	75	3		tRNA-Gly-TCC-2-1	73	0
tRNA-Ala-TGC-1-1	73	14		tRNA-Cys-GCA-3-1	73	3		tRNA-Gly-TCC-2-2	73	0
tRNA-Leu-CAA-3-1	108	14		tRNA-Cys-GCA-8-1	73	3		tRNA-Gly-TCC-2-3	73	0
tRNA-Lys-TTT-9-1	74	14		tRNA-Gln-TTG-6-1	74	3		tRNA-Gly-TCC-2-4	73	0
tRNA-Val-CAC-4-1	74	13		tRNA-Glu-CTC-1-4	73	3		tRNA-His-GTG-1-1	73	0
tRNA-Ala-AGC-2-1	73	13		tRNA-Glu-TTC-7-1	73	3		tRNA-Ile-AAT-11-1	76	0
tRNA-Leu-CAG-1-3	84	13		tRNA-Glu-TTC-9-1	72	3		tRNA-Ile-AAT-2-1	75	0
tRNA-Tyr-GTA-7-1	95	13		tRNA-iMet-CAT-1-6	73	3		tRNA-Ile-AAT-5-2	75	0
tRNA-Tyr-GTA-5-1	94	12		tRNA-Leu-AAG-2-2	83	3		tRNA-Ile-AAT-6-1	75	0
tRNA-Ala-AGC-17-1	74	12		tRNA-Met-CAT-4-1	74	3		tRNA-Ile-AAT-7-1	75	0
tRNA-Leu-TAA-3-1	84	11		tRNA-Met-CAT-4-2	74	3		tRNA-Ile-AAT-7-2	75	0
tRNA-Ala-AGC-12-1	74	11		tRNA-Ser-TGA-3-1	83	3		tRNA-Ile-AAT-9-1	75	0
tRNA-Met-CAT-3-2	74	10		tRNA-Tyr-GTA-5-2	90	3		tRNA-Ile-GAT-1-2	75	0
tRNA-Val-CAC-6-1	74	10		tRNA-Val-TAC-4-1	74	3		tRNA-Ile-GAT-1-3	75	0
tRNA-Phe-GAA-1-6	74	10		tRNA-Ala-AGC-10-1	74	2		tRNA-Ile-TAT-2-2	95	0
tRNA-Ala-TGC-8-1	73	10		tRNA-Ala-AGC-12-1	74	2		tRNA-Ile-TAT-2-3	95	0
tRNA-Trp-CCA-3-2	73	10		tRNA-Ala-AGC-17-1	74	2		tRNA-iMet-CAT-1-3	73	0
tRNA-Phe-GAA-3-1	74	9		tRNA-Ala-AGC-2-1	73	2		tRNA-Leu-AAG-2-1	83	0
tRNA-Trp-CCA-3-3	73	9		tRNA-Ala-AGC-5-1	73	2		tRNA-Leu-AAG-2-4	83	0
tRNA-Leu-AAG-2-2	83	8		tRNA-Ala-AGC-9-2	74	2		tRNA-Leu-AAG-6-1	83	0
tRNA-Asn-GTT-7-1	75	8		tRNA-Asn-GTT-2-3	75	2		tRNA-Leu-AAG-7-1	66	0
tRNA-Cys-GCA-24-1	73	8		tRNA-Asn-GTT-4-1	75	2		tRNA-Leu-CAA-2-1	109	0
tRNA-Lys-TTT-7-1	74	7		tRNA-Cys-GCA-10-1	73	2		tRNA-Leu-CAA-4-1	107	0
tRNA-Ala-AGC-6-1	73	7		tRNA-Cys-GCA-1-1	73	2		tRNA-Leu-CAG-1-2	84	0
tRNA-Arg-CCT-5-1	74	7		tRNA-Cys-GCA-16-1	73	2		tRNA-Leu-CAG-1-3	84	0
tRNA-Met-CAT-4-2	74	7		tRNA-Cys-GCA-9-2	73	2		tRNA-Leu-CAG-1-4	84	0
tRNA-Gln-CTG-11-1	73	6		tRNA-Glu-CTC-1-5	73	2		tRNA-Leu-CAG-1-7	84	0
tRNA-Tyr-GTA-6-1	90	6		tRNA-Glu-TTC-8-1	74	2		tRNA-Leu-CAG-2-1	84	0
tRNA-Ile-TAT-2-3	95	6		tRNA-Gly-CCC-chr1-18	72	2		tRNA-Leu-TAA-4-1	84	0
tRNA-Ser-GCT-4-1	83	6		tRNA-Gly-GCC-4-1	72	2		tRNA-Leu-TAA-5-1	84	0
tRNA-Asn-GTT-2-2	75	6		tRNA-Gly-TCC-2-2	73	2		tRNA-Lys-CTT-12-1	71	0
tRNA-Phe-GAA-1-2	74	6		tRNA-Gly-TCC-2-3	73	2		tRNA-Lys-CTT-9-1	77	0
tRNA-Leu-CAA-2-1	109	5		tRNA-Ile-AAT-9-1	75	2		tRNA-Lys-CTT-chr16-1	77	0
tRNA-Cys-GCA-14-1	73	5		tRNA-Ile-TAT-2-2	95	2		tRNA-Lys-TTT-10-1	74	0
tRNA-Gln-CAG-chr9-3	61	5		tRNA-iMet-CAT-1-8	73	2		tRNA-Lys-TTT-11-1	74	0
tRNA-Met-CAT-4-1	74	5		tRNA-Leu-CAG-1-3	84	2		tRNA-Lys-TTT-13-1	75	0
tRNA-Cys-GCA-1-1	73	5		tRNA-Lys-TTT-10-1	74	2		tRNA-Lys-TTT-7-1	74	0
tRNA-Lys-TTT-11-1	74	5		tRNA-Lys-TTT-11-1	74	2		tRNA-Lys-TTT-8-1	74	0
tRNA-Cys-GCA-23-1	73	5		tRNA-Lys-TTT-13-1	75	2		tRNA-Lys-TTT-9-1	74	0
tRNA-SeC-TCA-3-1	75	4		tRNA-Lys-TTT-9-1	74	2		tRNA-Lys-TTT-chr3-2	77	0
tRNA-Phe-GAA-1-1	74	4		tRNA-Lys-TTT-chr3-2	77	2		tRNA-Met-CAT-2-1	74	0
tRNA-Met-CAT-4-3	74	4		tRNA-Met-CAT-7-1	74	2		tRNA-Met-CAT-3-1	74	0
tRNA-Cys-GCA-20-1	73	4		tRNA-Ser-AGA-2-6	83	2		tRNA-Met-CAT-4-1	74	0
tRNA-Leu-AAG-6-1	83	4		tRNA-Ser-CGA-3-1	83	2		tRNA-Met-CAT-4-2	74	0
tRNA-Thr-CGT-5-1	75	4		tRNA-Ser-GCT-4-1	83	2		tRNA-Met-CAT-4-3	74	0
tRNA-Leu-TAA-5-1	84	3		tRNA-Tyr-ATA-1-1	94	2		tRNA-Met-CAT-5-1	74	0
tRNA-Asp-GTC-6-1	72	3		tRNA-Val-CAC-5-1	75	2		tRNA-Met-CAT-7-1	74	0
tRNA-Ala-AGC-10-1	74	3		tRNA-Val-TAC-1-1	74	2		tRNA-Phe-GAA-1-1	74	0
tRNA-Cys-GCA-9-2	73	3		nm-tRNA-SerTGA-AGA-chr11-8	71	1		tRNA-Phe-GAA-1-3	74	0
tRNA-Gly-GCC-4-1	72	3		nm-tRNA-Tyr-GTA-chr9-10	67	1		tRNA-Phe-GAA-1-5	74	0
tRNA-iMet-CAT-1-8	73	3		nmt-tRNA-Gln-TTG-7-1	73	1		tRNA-Phe-GAA-1-6	74	0
tRNA-Cys-GCA-18-1	73	3		tRNA-Ala-ATC-chr6-102	73	1		tRNA-Phe-GAA-2-1	74	0
tRNA-Und-NNN-3-1	74	3		tRNA-Asn-ATT-1-1	75	1		tRNA-Phe-GAA-3-1	74	0
tRNA-Thr-CGT-6-1	73	2		tRNA-Asn-GTT-16-2	75	1		tRNA-Pro-AGG-2-3	73	0
tRNA-Arg-TCT-5-1	88	2		tRNA-Asn-GTT-16-4	75	1		tRNA-Ser-ACT-1-1	75	0
tRNA-Ala-TGC-7-1	72	2		tRNA-Asn-GTT-16-5	75	1		tRNA-Ser-AGA-2-1	83	0
tRNA-Sup-TTA-1-1	72	2		tRNA-Asn-GTT-2-2	75	1		tRNA-Ser-AGA-2-6	83	0
tRNA-Ser-GCT-4-3	83	2		tRNA-Asn-GTT-7-1	75	1		tRNA-Ser-AGA-4-1	83	0
tRNA-Gln-TTG-6-1	74	2		tRNA-Asn-GTT-8-1	75	1		tRNA-Ser-AGA-5-1	73	0
tRNA-Tyr-GTA-5-2	90	2		tRNA-Cys-GCA-18-1	73	1		tRNA-Ser-CGA-3-1	83	0
tRNA-Cys-GCA-16-1	73	2		tRNA-Cys-GCA-20-1	73	1		tRNA-Ser-CGA-4-1	83	0
tRNA-Ile-AAT-9-1	75	2		tRNA-Cys-GCA-23-1	73	1		tRNA-Ser-GCT-2-1	83	0
tRNA-Ile-TAT-2-2	95	2		tRNA-Cys-GCA-24-1	73	1		tRNA-Ser-GCT-4-3	83	0
tRNA-Lys-TTT-10-1	74	2		tRNA-Cys-GCA-6-1	73	1		tRNA-Ser-GCT-6-1	79	0
tRNA-Phe-GAA-1-3	74	2		tRNA-Cys-GCA-chr11-21	57	1		tRNA-Ser-TGA-2-1	83	0
tRNA-Ser-AGA-5-1	73	2		tRNA-Glu-TTC-10-1	74	1		tRNA-Sup-TTA-1-1	72	0
tRNA-Glu-TTC-5-1	73	1		tRNA-Glu-TTC-6-1	73	1		tRNA-Thr-AGT-2-2	75	0
nm-tRNA-Tyr-GTA-chr14-8	67	1		tRNA-Gly-CCC-chr1-15	72	1		tRNA-Thr-AGT-7-1	75	0
tRNA-Cys-GCA-12-1	73	1		tRNA-Gly-TCC-2-4	73	1		tRNA-Thr-CGT-4-1	73	0
tRNA-iMet-CAT-1-3	73	1		tRNA-Ile-AAT-11-1	76	1		tRNA-Thr-CGT-5-1	75	0
tRNA-Glu-TTC-7-1	73	1		tRNA-iMet-CAT-1-7	73	1		tRNA-Thr-TGT-5-1	74	0
tRNA-Tyr-ATA-1-1	94	1		tRNA-Leu-AAG-6-1	83	1		tRNA-Thr-TGT-6-1	73	0
nm-tRNA-SerTGA-AGA-chr11-8	71	1		tRNA-Leu-CAG-1-2	84	1		tRNA-Trp-CCA-3-2	73	0
tRNA-Glu-TTC-6-1	73	1		tRNA-Lys-CTT-9-1	77	1		tRNA-Trp-CCA-3-3	73	0
tRNA-iMet-CAT-1-7	73	1		tRNA-Phe-GAA-10-1	63	1		tRNA-Tyr-ATA-1-1	94	0
tRNA-Lys-CTT-9-1	77	1		tRNA-Phe-GAA-1-2	74	1		tRNA-Tyr-GTA-4-1	95	0
tRNA-Thr-AGT-7-1	75	1		tRNA-Phe-GAA-1-3	74	1		tRNA-Tyr-GTA-5-1	94	0
nm-tRNA-Tyr-GTA-chr21-2	67	0		tRNA-Pro-AGG-3-1	96	1		tRNA-Tyr-GTA-5-2	90	0
nm-tRNA-Tyr-GTA-chr1-125	67	0		tRNA-Pro-TGG-3-3	73	1		tRNA-Tyr-GTA-5-3	95	0
tRNA-Ala-CGC-5-1	73	0		tRNA-Ser-AGA-5-1	73	1		tRNA-Tyr-GTA-5-5	90	0
tRNA-Und-NNN-2-1	70	0		tRNA-Thr-AGT-7-1	75	1		tRNA-Tyr-GTA-6-1	90	0
tRNA-Lys-TTT-chr3-2	77	0		tRNA-Thr-CGT-5-1	75	1		tRNA-Und-NNN-2-1	70	0
tRNA-Met-CAT-7-1	74	0		tRNA-Trp-CCA-3-2	73	1		tRNA-Und-NNN-3-1	74	0
nmt-tRNA-Gln-TTG-7-1	73	0		tRNA-Tyr-GTA-1-1	92	1		tRNA-Val-CAC-11-1	74	0
tRNA-Cys-GCA-chr11-21	57	0		tRNA-Tyr-GTA-7-1	95	1		tRNA-Val-CAC-5-1	75	0
tRNA-Ile-AAT-11-1	76	0		tRNA-Und-NNN-3-1	74	1		tRNA-Val-CAC-8-1	72	0
tRNA-Val-CAC-11-1	74	0		tRNA-Val-CAC-11-1	74	1		tRNA-Val-TAC-4-1	74	0
		538226				3733042				1571546

## Sheet: Tabelle2
tRNA from virion				complete vRNAP tRNA				complete vRNAP tRNA treated with RNAse T/A1
tRNA-Gln-TTG-2-1	73	67177		tRNA-Gln-TTG-2-1	73	1279882		tRNA-Gln-TTG-2-1	73	912156
tRNA-Gly-GCC-1-5	72	45935		tRNA-Arg-ACG-2-1	74	598016		tRNA-Gln-CTG-1-4	73	147442
tRNA-Arg-ACG-2-1	74	38076		tRNA-Gln-TTG-1-1	73	426044		tRNA-Arg-TCG-1-1	74	134066
tRNA-Arg-ACG-1-3	74	23541		tRNA-Arg-ACG-1-3	74	231525		tRNA-Arg-ACG-2-1	74	62214
tRNA-Gln-TTG-1-1	73	20026		tRNA-Gln-TTG-3-2	73	204003		tRNA-Gln-TTG-3-2	73	41215
tRNA-Gly-GCC-2-3	72	16205		tRNA-Gln-CTG-1-4	73	182375		tRNA-Arg-ACG-1-3	74	39962
tRNA-Gln-CTG-1-4	73	14382		tRNA-Arg-ACG-1-1	74	144080		tRNA-Gln-TTG-1-1	73	37309
tRNA-Arg-TCG-3-1	74	13633		tRNA-Arg-TCG-1-1	74	130723		tRNA-Gln-CTG-2-1	73	36097
tRNA-Gln-TTG-3-2	73	13066		tRNA-Arg-TCG-3-1	74	88206		tRNA-Gln-CTG-6-1	73	28115		TOP 20 reads
tRNA-Gly-GCC-2-6	72	12926		tRNA-Gln-CTG-2-1	73	77548		tRNA-Gln-TTG-3-3	73	18099
tRNA-His-GTG-1-2	73	12325		tRNA-Gln-CTG-6-1	73	54013		tRNA-Gln-TTG-3-1	73	16060
tRNA-Arg-TCG-1-1	74	12021		tRNA-Gln-CTG-4-1	73	29896		tRNA-Gln-CTG-1-3	73	11273
tRNA-Arg-ACG-1-1	74	11063		tRNA-Gln-CTG-4-2	73	25163		tRNA-Gln-CTG-1-1	73	10979
tRNA-Asp-GTC-2-6	73	10369		tRNA-Gln-CTG-1-1	73	22817		tRNA-Gln-CTG-4-2	73	9938
tRNA-Asp-GTC-2-8	73	9744		tRNA-Arg-TCG-2-1	74	22661		tRNA-Gln-CTG-1-2	73	9147
tRNA-Asp-GTC-2-7	73	9433		tRNA-Gln-CTG-1-3	73	19083		tRNA-Gln-CTG-1-5	73	7850
tRNA-Gly-CCC-2-2	72	8605		tRNA-Gln-TTG-3-3	73	18206		tRNA-Gln-TTG-4-1	73	7168
tRNA-Glu-TTC-2-1	73	8086		tRNA-Gln-TTG-3-1	73	16717		tRNA-Arg-TCG-2-1	74	6816
tRNA-Gly-TCC-2-6	73	7079		tRNA-Arg-CCG-1-1	74	12577		tRNA-Gln-CTG-5-1	73	5525
tRNA-iMet-CAT-1-4	73	5241		tRNA-Arg-CCG-1-2	74	12017		tRNA-Arg-TCG-4-1	74	3954
tRNA-Gln-CTG-6-1	73	5007		tRNA-Gln-CTG-1-5	73	11723		tRNA-Gln-CTG-3-1	73	3029
tRNA-Arg-CCG-2-1	74	4639		tRNA-Gln-CTG-1-2	73	10632		tRNA-Arg-ACG-1-1	74	2866
		368579				3617907				1551280
		reads	rel.reads			reads	rel.reads			reads	rel.reads
tRNA Gln		128263	0.347993	tRNA Gln		2378102	0.657314	tRNA Gln		1301402	0.838921
tRNA Arg		102973	0.279378	tRNA Arg		1239805	0.342686	tRNA Arg		249878	0.161079
tRNA Gly		82145	0.222869	tRNA Gly		0		tRNA Gly		0
tRNA Asp		29546	0.0801619	tRNA Asp		0		tRNA Asp		0
tRNA His		12325	0.0334392	tRNA His		0		tRNA His		0
Meti		5241	0.0142195	Meti		0		Meti		0
tRNA Glu		8086	0.0219383	tRNA Glu		0		tRNA Glu		0
		368579				3617907				1551280

## Sheet: Tabelle3
Top 40 reads
vv tRNA				tRNA cII				RNAse
tRNA-Gln-TTG-2-1	73	67177		tRNA-Gln-TTG-2-1	73	1279882		tRNA-Gln-TTG-2-1	73	912156
tRNA-Gly-GCC-1-5	72	45935		tRNA-Arg-ACG-2-1	74	598016		tRNA-Gln-CTG-1-4	73	147442
tRNA-Arg-ACG-2-1	74	38076		tRNA-Gln-TTG-1-1	73	426044		tRNA-Arg-TCG-1-1	74	134066
tRNA-Arg-ACG-1-3	74	23541		tRNA-Arg-ACG-1-3	74	231525		tRNA-Arg-ACG-2-1	74	62214
tRNA-Gln-TTG-1-1	73	20026		tRNA-Gln-TTG-3-2	73	204003		tRNA-Gln-TTG-3-2	73	41215
tRNA-Gly-GCC-2-3	72	16205		tRNA-Gln-CTG-1-4	73	182375		tRNA-Arg-ACG-1-3	74	39962
tRNA-Gln-CTG-1-4	73	14382		tRNA-Arg-ACG-1-1	74	144080		tRNA-Gln-TTG-1-1	73	37309
tRNA-Arg-TCG-3-1	74	13633		tRNA-Arg-TCG-1-1	74	130723		tRNA-Gln-CTG-2-1	73	36097
tRNA-Gln-TTG-3-2	73	13066		tRNA-Arg-TCG-3-1	74	88206		tRNA-Gln-CTG-6-1	73	28115
tRNA-Gly-GCC-2-6	72	12926		tRNA-Gln-CTG-2-1	73	77548		tRNA-Gln-TTG-3-3	73	18099
tRNA-His-GTG-1-2	73	12325		tRNA-Gln-CTG-6-1	73	54013		tRNA-Gln-TTG-3-1	73	16060
tRNA-Arg-TCG-1-1	74	12021		tRNA-Gln-CTG-4-1	73	29896		tRNA-Gln-CTG-1-3	73	11273
tRNA-Arg-ACG-1-1	74	11063		tRNA-Gln-CTG-4-2	73	25163		tRNA-Gln-CTG-1-1	73	10979
tRNA-Asp-GTC-2-6	73	10369		tRNA-Gln-CTG-1-1	73	22817		tRNA-Gln-CTG-4-2	73	9938
tRNA-Asp-GTC-2-8	73	9744		tRNA-Arg-TCG-2-1	74	22661		tRNA-Gln-CTG-1-2	73	9147
tRNA-Asp-GTC-2-7	73	9433		tRNA-Gln-CTG-1-3	73	19083		tRNA-Gln-CTG-1-5	73	7850
tRNA-Gly-CCC-2-2	72	8605		tRNA-Gln-TTG-3-3	73	18206		tRNA-Gln-TTG-4-1	73	7168
tRNA-Glu-TTC-2-1	73	8086		tRNA-Gln-TTG-3-1	73	16717		tRNA-Arg-TCG-2-1	74	6816
tRNA-Gly-TCC-2-6	73	7079		tRNA-Arg-CCG-1-1	74	12577		tRNA-Gln-CTG-5-1	73	5525
tRNA-iMet-CAT-1-4	73	5241		tRNA-Arg-CCG-1-2	74	12017		tRNA-Arg-TCG-4-1	74	3954
tRNA-Gln-CTG-6-1	73	5007		tRNA-Gln-CTG-1-5	73	11723		tRNA-Gln-CTG-3-1	73	3029
tRNA-Arg-CCG-2-1	74	4639		tRNA-Gln-CTG-1-2	73	10632		tRNA-Arg-ACG-1-1	74	2866
tRNA-Lys-TTT-3-5	74	4526		tRNA-Arg-CCG-1-3	74	9206		tRNA-Arg-CCG-2-1	74	2638
tRNA-Ser-AGA-1-1	83	3902		tRNA-Arg-CCG-2-1	74	8948		tRNA-Gln-CTG-3-2	73	2486
tRNA-Asp-GTC-1-1	73	3579		tRNA-Arg-TCG-4-1	74	7959		tRNA-Arg-CCG-1-1	74	1625
tRNA-Lys-CTT-3-1	74	3408		tRNA-Arg-TCG-5-1	74	7347		tRNA-Arg-ACG-2-2	74	1366
tRNA-Ala-AGC-4-1	73	3141		tRNA-Gln-TTG-4-1	73	5551		tRNA-Gln-CTG-9-1	73	1118
tRNA-Lys-CTT-1-1	74	2932		tRNA-His-GTG-1-2	73	5144		tRNA-Arg-TCG-3-1	74	1091
tRNA-Arg-TCG-2-1	74	2849		tRNA-Gln-CTG-9-1	73	4906		tRNA-Arg-ACG-2-4	74	1043
tRNA-Glu-CTC-2-1	73	2742		tRNA-Lys-TTT-3-5	74	4455		tRNA-Gln-CTG-4-1	73	823
tRNA-Glu-TTC-1-1	73	2629		tRNA-Arg-ACG-2-2	74	4005		tRNA-Arg-ACG-1-2	74	780
tRNA-Arg-TCG-4-1	74	2578		tRNA-Gln-CTG-3-2	73	3678		tRNA-Lys-CTT-10-1	77	774
tRNA-Gln-CTG-4-2	73	2484		tRNA-Gln-CTG-5-1	73	3574		tRNA-iMet-CAT-1-4	73	731
tRNA-Arg-CCG-1-1	74	2362		tRNA-Lys-CTT-chr15-5	61	3042		tRNA-His-GTG-1-2	73	701
tRNA-Pro-TGG-3-1	73	2331		tRNA-Gln-CTG-3-1	73	2934		tRNA-Arg-TCG-5-1	74	467
tRNA-Gln-CTG-2-1	73	2302		tRNA-Arg-ACG-1-2	74	2903		tRNA-Arg-TCG-6-1	74	277
nm-tRNA-Tyr-GTA-chr9-10	67	2019		tRNA-Asp-GTC-2-6	73	2658		tRNA-iMet-CAT-2-1	73	211
tRNA-Val-TAC-2-1	74	1987		tRNA-iMet-CAT-1-4	73	2582		tRNA-Gln-CTG-12-1	74	203
tRNA-Tyr-GTA-3-1	90	1883		tRNA-Asp-GTC-2-8	73	2429		tRNA-Lys-TTT-4-1	74	200
tRNA-Asn-GTT-2-1	75	1839		tRNA-Arg-ACG-2-4	74	2278		tRNA-Lys-TTT-3-5	74	193
		418072				3701506				1568007
Name		reads		Name		reads		Name		reads
tRNA Gln		121960		tRNA Gln		2399385		tRNA Gln		1306032
tRNA Arg		110762		tRNA Arg		1282451		tRNA Arg		259165
tRNA Gly		90750		tRNA Gly		0		tRNA Gly		0
tRNA Asp		33125		tRNA Asp		5087		tRNA Asp		0
tRNA His		12325		tRNA His		5144		tRNA His		701
tRNA Glu		13457		tRNA Glu		0		tRNA Glu		0
tRNA lys		10866		tRNA lys		7497		tRNA lys		393
tRNA meti		5241		tRNA meti		2582		tRNA meti		942
tRNA Ser		3902		tRNA Ser		0		tRNA Ser		0
tRNA Ala		3141		tRNA Ala		0		tRNA Ala		0
tRNA Pro		2331		tRNA Pro		0		tRNA Pro		0
tRNATyr		4350		tRNATyr		0		tRNATyr		0
tRNA Val		1987		tRNA Val		0		tRNA Val		0
