# Supplementary material for: tRNA as an assembly chaperone for a macromolecular transcription-processing complex
Source: Nat Struct Mol Biol. 2025 Sep 4;32(11):2349–58. doi: 10.1038/s41594-025-01653-y (PMC12618233; doi:10.1038/s41594-025-01653-y)
Supplement: Supplementary file 7 — Statistical source data. [file 41594_2025_1653_MOESM7_ESM.xlsx]

## Sheet: Statistical Data Figure 1
Schift assay Replication 1 (Fig. 1C)
uper band:	lower band:	total 1:
81320.6	69860.2	151181
101223	45543	146766
Schift assay Replication 2 (Fig.1C)
upper band:	upper band:	upper band:	upper band:	upper band:	upper band:	upper band:	upper band:	upper band:	upper band:
83872.6	81579	165452
108609	41597	150206
schift assay Replication 3 (Fig. 1C)
upper band:	lower band:	total 3:
84926.7	58800.7	143727
88110	46179.8	134290
Schift assay Replication (Fig.1C)
upper band:	lower band:	total 4: Upper band
66143.8	54347.1	120491
Quantification :
upper band ( 1ul of CI)	totral (1ug)				tRNAGln/Arg-bounded to Core vRNAP/E11/NPH1	Ratio (upper band over total)	Average (1ug)	Standart deviation (uppet band)
81320.6	151181				tRNAGln/Arg-bounded to Core vRNAP/E11/NPH1	53.7903	54.6168	3.47149
83872.6	165452				tRNAGln/Arg-bounded to Core vRNAP/E11/NPH1	50.6931
84926.7	143727				tRNAGln/Arg-bounded to Core vRNAP/E11/NPH1	59.0887
66143.8	120491				tRNAGln/Arg-bounded to Core vRNAP/E11/NPH1	54.8952
lower band:	total (2ug)					Ratio (( upper band 2ug)	Average (2ug)	Standart deviation (2 ug)
101223	146766				tRNAGln/Arg-bounded to Core vRNAP/E11/NPH1	68.9689	68.9481	3.32585
108609	150296				tRNAGln/Arg-bounded to Core vRNAP/E11/NPH1	72.2635
88110	134290				tRNAGln/Arg-bounded to Core vRNAP/E11/NPH1	65.6119
	Average	STD
vRNAP-bounded tRN (1µg of Core vRNAP)	54.6168	3.47149
vRNAP-bounded tRN (2µg of Core vRNAP)	68.9481	3.32585
Core vRNAP bindings with tRNAgln/Arg (Fig.1B)
	Fractions count 1	total 1:	Ration Fr/total		Fractions counts 2:	Total 2:	Ration Fr2/ Total 2		Fraction counts 3:	Total3	Ratio Fr3/total 3
	4171.1	716895	0.581829		2478.45	801709	0.309145		87.192	209154	0.0416879
	64992.8		9.06587		53747.7	801709	6.70414		5765.18	209154	2.75642
	104448		14.5695		92706.4	801709	11.5636		43037.3	209154	20.5768
	108537		15.1399		98206.6	801709	12.2497		55879.9	209154	26.7171
	94197.6		13.1397		89496.7	801709	11.1632		30934.4	209154	14.7902
	70533.9		9.8388		70780.8	801709	8.82873		11768.1	209154	5.62651
	48762		6.80183		51759	801709	6.45608		7899.39	209154	3.77682
	29877		4.16756		34770	801709	4.33699		4133.52	209154	1.9763
	23308.2		3.25127		22162.6	801709	2.76442		1850.31	209154	0.884661
	14073.3		1.96309		12976.7	801709	1.61863		1283.55	209154	0.613685
	12430.6		1.73394		10045.3	801709	1.25299		970.234	209154	0.463884
	28915.9		4.0335		24407.7	801709	3.04445		3564.1	209154	1.70406
	48525.7		6.76887		62827.8	801709	7.83673		10454.1	209154	4.99827
	37944		5.29283		75733.6	801709	9.44652		21144.3	209154	10.1094
	20703.5		2.88794		60855.9	801709	7.59077		8971.72	209154	4.28952
	4159.62		0.580227		29526.4	801709	3.68293		917.305	209154	0.438578
	1011.16		0.141048		8697.7	801709	1.08489		46.95	209154	0.0224475
	63.95		0.00892041		1712.72	801709	0.213633		121.95	209154	0.0583063
	209.607		0.0292382		391.92	801709	0.0488855		212.435	209154	0.101569
	29.563		0.00412375		903.719	801709	0.112724		112.364	209154	0.053723
Ration Fr/total	Ration Fr2/ Total 2	Ratio Fr3/total 3		Average Frs	STD
0.581829	0.309145	0.0416879		0.310887	0.270075
9.06587	6.70414	2.75642		6.17548	3.18777
14.5695	11.5636	20.5768		15.57	4.58916
15.1399	12.2497	26.7171		18.0355	7.65604
13.1397	11.1632	14.7902		13.031	1.81594
9.8388	8.82873	5.62651		8.09801	2.19916
6.80183	6.45608	3.77682		5.67825	1.65573
4.16756	4.33699	1.9763		3.49362	1.31676
3.25127	2.76442	0.884661		2.30012	1.24976
1.96309	1.61863	0.613685		1.39847	0.701125
1.73394	1.25299	0.463884		1.15027	0.641229
4.0335	3.04445	1.70406		2.92733	1.16913
6.76887	7.83673	4.99827		6.53462	1.43366
5.29283	9.44652	10.1094		8.28292	2.61063
2.88794	7.59077	4.28952		4.92275	2.41451
0.580227	3.68293	0.438578		1.56725	1.83361
0.141048	1.08489	0.0224476		0.41613	0.582195
0.00892041	0.213633	0.0583062		0.09362	0.106828
0.0292382	0.0488855	0.101569		0.0598974	0.0374015
0.00412375	0.112724	0.053723		0.0568569	0.0543679

## Sheet: Statistical Data Ext. Fig. 9
165.607	49.364			6632.44	4764		0	0
6798.05	4813.36			15437.1	19233.1		19441	2699
15602.8	19282.5			24829.1	33180.9		27148.7	14792.6
24994.7	33230.3			19441	2699		40867.4	47964.9			y=1,38134154X-2080,6656
19606.6	2748.37			27148.7	14792.6
27314.3	14842			40867.4	47964.9
41033	48014.2
colum A - WB without substrcted background
columB -NB without substracted background
colum E - WB with substracted background)
colum F - NB with substracted background
	E1-E3; F1-F3 Virion
	E4-E6; F4-F6 Complete vRNAP
0	0
6632.44	4763.99
15437.1	19233.1
24829.1	33180
	y=1,38130702x-1901,0948
